# Supplementary material for: Unraveling the structure and chemical mechanisms of highly oxygenated intermediates in oxidation of organic compounds
Source: PubMed Central journal article supplement — Proc Natl Acad Sci U S A. 2017 Nov 28;114(50):13102–7. doi: 10.1073/pnas.1707564114 (PMC5740676; doi:10.1073/pnas.1707564114), 2017-11-28
Supplement: pnas.1707564114.sapp.pdf [file pnas.1707564114.sapp.pdf]

# Supporting Information for

## Unraveling the structure and chemical mechanisms of highly oxygenated intermediates in oxidation of organic compounds

Zhandong Wang<sup>a,\*</sup>, Denisia M. Popolan-Vaida<sup>b,c,d,e</sup>, Bingjie Chen<sup>a</sup>, Kai Moshhammer<sup>f,g</sup>, Samah Y. Mohamed<sup>a</sup>, Heng Wang<sup>a</sup>, Salim Sioud<sup>h</sup>, Misjudeen A. Raji<sup>h</sup>, Katharina Kohse-Höinghaus<sup>i</sup>, Nils Hansen<sup>f</sup>, Philippe Dagaut<sup>j</sup>, Stephen R. Leone<sup>b,c,d</sup>, S. Mani Sarathy<sup>a,\*</sup>

<sup>a</sup>King Abdullah University of Science and Technology (KAUST), Clean Combustion Research Center (CCRC), Thuwal 23955-6900, Saudi Arabia

<sup>b</sup>Department of Chemistry, University of California, Berkeley, CA 94720, USA

<sup>c</sup>Department of Physics, University of California, Berkeley, CA 94720, USA

<sup>d</sup>Chemical Sciences Division, Lawrence Berkeley National Laboratory, Berkeley, CA 94720, USA

<sup>e</sup>Department of Chemistry, University of Central Florida, Orlando, FL 32816-2450, USA

<sup>f</sup>Combustion Research Facility, Sandia National Laboratories, Livermore, CA 94551, USA

<sup>g</sup>Physikalisch-Technische Bundesanstalt, Bundesallee 100, 38116 Braunschweig, Germany

<sup>h</sup>King Abdullah University of Science and Technology (KAUST), Analytical Core Lab (ACL), Thuwal 23955-6900, Saudi Arabia

<sup>i</sup>Department of Chemistry, Bielefeld University, D-33615 Bielefeld, Germany

<sup>j</sup>Centre National de la Recherche Scientifique (CNRS), Institut National des Sciences de l'Ingénierie et des Systèmes (INSIS), Institut de Combustion, Aérothermique, Réactivité et Environnement (ICARE), 1C ave recherche scientifique, 45071, Orléans, cedex 2, France

## S1: Experimental

### S1.1: Details of experimental method

The majority of measurements were obtained using SVUV-PI-MBMS, which freezes the reaction upon molecular beam sampling and enables the detection of reactive intermediates (e.g., peroxides) (1, 2). The diagram of the JSR-1 experimental setup is presented in Fig. S1A. The mass spectrometer has a sensitivity range of 1 ppm, a mass resolving power of ~3500, and a dynamic range of six orders of magnitude. The photoionization spectra at 9.5 or 9.6 eV were measured at varying reactor temperatures to obtain the distribution of auto-oxidation products.

The photoionization efficiency spectra (PIE) of the auto-oxidation products and their fragments were measured from 8.5 to 10.5 eV.

SVUV-PI-MBMS experiments were performed at Terminal 3 of the Chemical Dynamics Beamline of the Advanced Light Source at the Lawrence Berkeley National Laboratory. The photon beam has a high flux ( $10^{14}$  photons/s) and very good energy resolution [ $E/\Delta E(\text{fwhm}) \sim 250\text{--}400$ ] in the chemically interesting region from 7.4 to 30 eV. It is an important assumption that only singly charged ions are formed. The JSR, with a volume of about  $33.5 \text{ cm}^3$ , was composed of quartz; a K-type thermocouple, coated with Inconel alloy 600 (Thermocoax), was fixed at the vicinity of the sampling cone to measure the reactor temperature. Experiments conducted without the thermocouple in place detected similar species' distributions in the reactor, indicating that the thermocouple did not catalyze the oxidation reaction under the conditions studied here. Uncertainty in the reactor temperature was  $\pm 20 \text{ K}$ , obtained by measuring the temperature distribution inside the JSR with a movable thermocouple. Gas streams of fuels and oxygen (diluted with argon) were guided through two concentric tubes, mixing at their outlets. The mixed gases then entered the reactor through four injectors, with exit nozzles located in the center of the JSR. The four nozzles, each with an inner diameter of about 1 mm, created gas jets at their outlets and induced turbulent mixing. The fuel flow rate was measured by a syringe pump, mixed with Ar flow, controlled by calibrating (against  $\text{N}_2$ ) mass flow controllers (MKS), and vaporized in a simple vaporizer at a temperature  $\sim 30 \text{ K}$  higher than the fuel's boiling point. The gas flows of  $\text{O}_2$  and the remaining Ar were also regulated by calibrating (against  $\text{N}_2$ ) mass flow controllers (MKS). The reactor was completely enclosed by an oven that allowed for adjusting temperature over the desired range. The oven and the reactor were surrounded by a water-cooled stainless steel chamber. Exhaust gases were continuously removed to maintain pressure constant at 700 Torr. The reaction gases were from the reactor and guided into the molecular-beam mass spectrometer through a quartz nozzle with a  $40^\circ$  cone angle and a  $\sim 50 \text{ }\mu\text{m}$  orifice diameter at the tip.

Details of the MBMS section of the instrument are described elsewhere (1). The apparatus consisted of a two-stage differentially-pumped vacuum chamber that hosted the ion source of the mass spectrometer. A reduction from near atmospheric pressure in the reactor to  $\sim 10^{-3}$  mbar in the first pumping stage led to the formation of a molecular beam and precluded further reactions.

The beam then passed through a skimmer into the ionization region of the mass spectrometer, held at  $10^{-6}$  mbar.

For the APCI-OTMS experiment, the mass scan range was set to cover the  $m/z$  range 50–300 and the analytes were detected in the Orbitrap at a mass resolving power of 100000, a sensitivity range of 1-5 ppm, and mass accuracy  $< 5$  ppm. The diagram of JSR-2 combined with APCI-OTMS is presented in Fig. S1B (3). APCI-OTMS experiments were performed at the Analytical Core Lab of King Abdullah University of Science & Technology (KAUST). The volume of the jet-stirred reactor was about  $76 \text{ cm}^3$ . Similar to the JSR for the SVUV-PI-MBMS experiment, gas streams of fuels and oxygen (diluted with argon) were guided through two concentric tubes, mixing at their outlets. The mixed gases then entered the reactor through four injectors, with exit nozzles located in the center of the JSR. The four nozzles, each with an inner diameter of about 0.3 mm, created gas jets at their outlets and induced turbulent mixing. The reactor was covered by an oven, and temperatures of the oven and the reactor were measured by a K-type thermocouple. The pressure of the reactor was maintained at atmospheric pressure. The flow rate of the fuel was measured by a syringe pump and mixed with Ar in a simple vaporizer at a temperature  $\sim 30$  K higher than the boiling point of the fuel. The flow of Ar and  $\text{O}_2$  was controlled by calibrating (against  $\text{N}_2$ ) mass flow controllers (MKS). The JSR and the sampling method was similar to that used by Dagaut *et al.* (4). The products were sampled using a quartz tube at the outlet of the reactor and ionized by the APCI; the ions were then sucked into the system using a skimmer with a positive mode for analysis. In the analysis, the Orbitrap automated gain control (AGC) target was set to  $1 \times 10^6$  charges for full scan and the micro scan was set to 500 ms. The vaporizer temperature of the APCI source was 430 K, the sheath gas flow rate was 50 (arb. unit), the Aux gas flow rate was 20 (arb. unit), and the sweep gas flow rate was 10 (arb. unit). The temperature of the capillary was 548 K. The signal of the intermediate was recorded for a minute and an average signal was obtained from the scans. The calibration of the LTQ-Orbitrap mass analyzer was performed in positive ESI ionization mode, according to manufacturer's guidelines. The Orbitrap mass spectrometer was operated using XCalibur software.

Tunable synchrotron vacuum ultraviolet light was used in a single photon ionization technique. A neutral species was ionized when the photon energy was higher than its ionization energy, resulting in a molecular peak ( $\text{M}^+$ ) and/or its fragments. The APCI is a soft ionization

method with low fragmentation risk, mainly used with polar and relatively nonpolar compounds, and generally producing mono-charged ions. The analyte was in the gaseous form in this work; its ionization was accomplished using an atmospheric pressure corona discharge (5-7  $\mu\text{A}$ ). APCI spectra provide an easily identifiable protonated molecular ion peak  $[\text{M}+\text{H}]^+$ , which allows the determination of the molecular mass (5).

This work investigated the auto-oxidation of ten non-oxygenated organic compounds and five organic compounds with oxygen-containing functional groups. The experimental conditions for the SVUV-PI-MBMS and APCI-OTMS experiments are shown in Table S1. Most of the procedure was performed by the SVUV-PI-MBMS; the auto-oxidation of methylcyclohexane and 4-methylheptane was investigated by APCI-OTMS; while the auto-oxidation of 2,7-dimethyloctane and cyclohexane was studied in both set-ups.

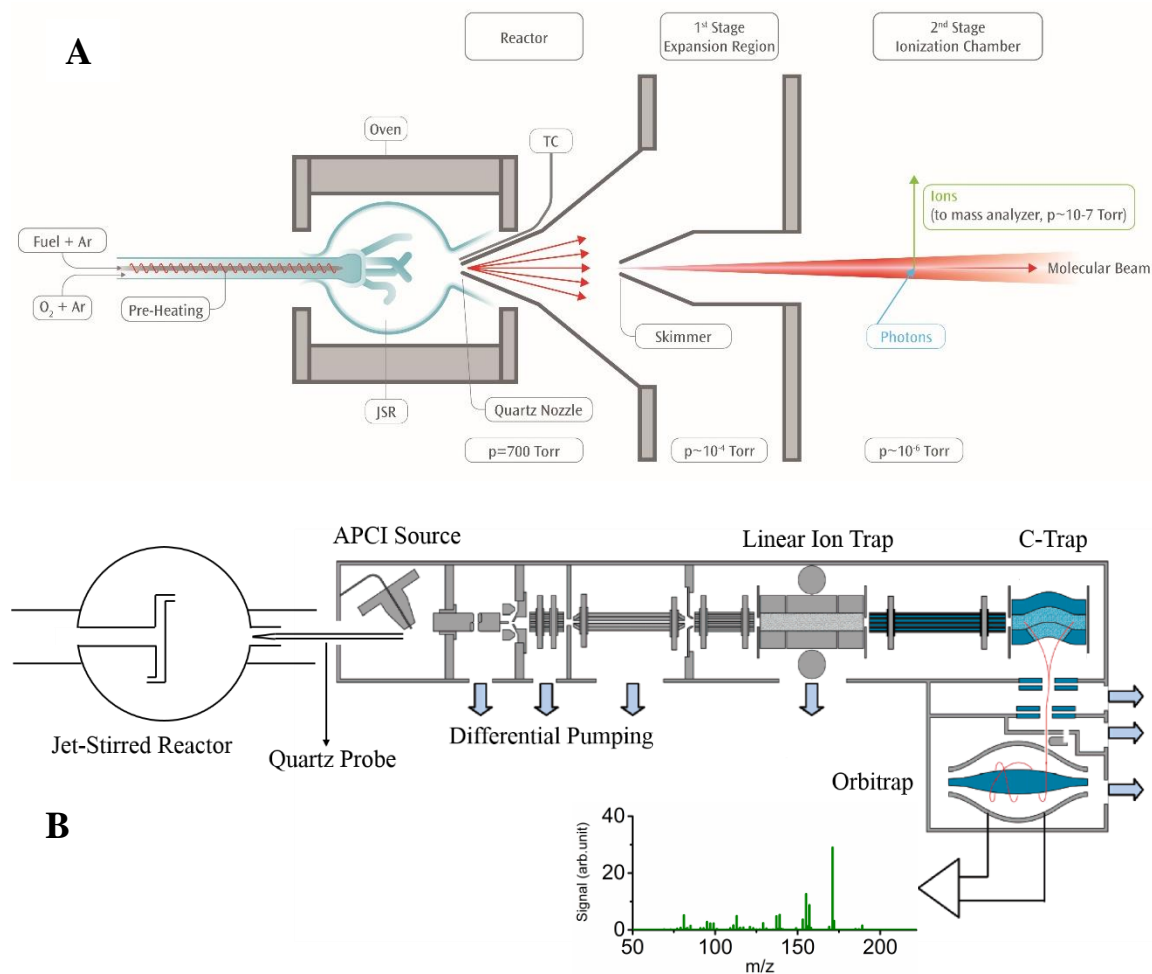

**Figure S1:** Schematic representation of experimental model for JSR experiment at ALS (A) and KAUST (B). Figure S1A courtesy of ref. 27 [Moshhammer, et al.] from the main-text, copyright 2016 American Chemical Society, with permission from Journal of Physical Chemistry. Figure S1B courtesy of ref. 30 [Wang, et al.] from the main-text, copyright 2017, with permission from Elsevier.

**Table S1:** Experimental conditions for organic compound auto-oxidation and H/D exchange reactions in this work

| Diagnostics      | Reactant                                               | Composition                                                                     | $\phi$ | Residence time (s) | Pressure (Torr) |
|------------------|--------------------------------------------------------|---------------------------------------------------------------------------------|--------|--------------------|-----------------|
| SVUV-PI-MBMS     | <i>n</i> -heptane                                      | 1% fuel/11% <sup>16</sup> O <sub>2</sub> /88% Ar                                | 1      | 2                  | 700             |
|                  | cyclohexane                                            | 1% fuel/18% <sup>16</sup> O <sub>2</sub> /81% Ar                                | 0.5    | 2                  | 700             |
|                  | cyclohexane                                            | 1% fuel/9% <sup>18</sup> O <sub>2</sub> /90% Ar                                 | 1      | 2                  | 700             |
|                  | cycloheptane                                           | 1.5% fuel/15.75% <sup>16</sup> O <sub>2</sub> /82.75% Ar                        | 1      | 2                  | 700             |
|                  | <i>n</i> -decane                                       | 0.8% fuel/12.4% <sup>16</sup> O <sub>2</sub> /86.8% Ar                          | 1      | 2                  | 700             |
|                  | <i>n</i> -dodecane                                     | 0.6% fuel/11.1% <sup>16</sup> O <sub>2</sub> /88.3% Ar                          | 1      | 2                  | 700             |
|                  | 2-methylnonane                                         | 0.8% fuel/12.4% <sup>16</sup> O <sub>2</sub> /86.8% Ar                          | 1      | 2                  | 700             |
|                  | 2,7-dimethyloctane                                     | 0.8% fuel/12.4% <sup>16</sup> O <sub>2</sub> /86.8% Ar                          | 1      | 2                  | 700             |
|                  | 2,7-dimethyloctane                                     | 0.8% fuel/12.4% <sup>18</sup> O <sub>2</sub> /86.8% Ar                          | 1      | 2                  | 700             |
|                  | 2,7-dimethyloctane/D <sub>2</sub> O                    | 0.76% fuel/11.8% <sup>16</sup> O <sub>2</sub> /82.68% Ar/4.76% D <sub>2</sub> O | 1      | 1.9                | 700             |
|                  | <i>n</i> -butylcyclohexane                             | 0.8% fuel/12% <sup>16</sup> O <sub>2</sub> /87.2% Ar                            | 1      | 2                  | 700             |
|                  | <i>n</i> -decanol                                      | 0.8% fuel/12% <sup>16</sup> O <sub>2</sub> /87.2% Ar                            | 1      | 2                  | 700             |
|                  | decanal                                                | 0.8% fuel/11.6% <sup>16</sup> O <sub>2</sub> /87.6% Ar                          | 1      | 2                  | 700             |
|                  | 2-decanone                                             | 0.8% fuel/11.6% <sup>16</sup> O <sub>2</sub> /87.6% Ar                          | 1      | 2                  | 700             |
|                  | dipentyl ether                                         | 0.8% fuel/12% <sup>16</sup> O <sub>2</sub> /87.2% Ar                            | 1      | 2                  | 700             |
| methyl decanoate | 0.8% fuel/12.4% <sup>16</sup> O <sub>2</sub> /86.8% Ar | 1                                                                               | 2      | 700                |                 |
| APCI-OTMS        | cyclohexane                                            | 1% fuel/9% <sup>16</sup> O <sub>2</sub> /90% Ar                                 | 1      | 2                  | 760             |
|                  | methylcyclohexane                                      | 1.5% fuel/15.75% <sup>16</sup> O <sub>2</sub> /82.75% Ar                        | 1      | 2                  | 760             |
|                  | 4-methylheptane                                        | 1% fuel/12.5% <sup>16</sup> O <sub>2</sub> /86.5% Ar                            | 1      | 2                  | 760             |
|                  | 2,7-dimethyloctane                                     | 0.8% fuel/12.4% <sup>16</sup> O <sub>2</sub> /86.8% Ar                          | 1      | 2                  | 760             |
| SVUV-PI-MBMS     | 2,7-dimethyloctane/D <sub>2</sub> O                    | 0.76% fuel/94.48% Ar/4.76% D <sub>2</sub> O                                     |        | 1.9                | 700             |
|                  | ethanol/D <sub>2</sub> O                               | 0.76% fuel/94.48% Ar/4.76% D <sub>2</sub> O                                     |        | 1.9                | 700             |
|                  | acetone/D <sub>2</sub> O                               | 0.76% fuel/94.48% Ar/4.76% D <sub>2</sub> O                                     |        | 1.9                | 700             |
|                  | propanal/D <sub>2</sub> O                              | 0.76% fuel/94.48% Ar/4.76% D <sub>2</sub> O                                     |        | 1.9                | 700             |
|                  | acetic acid/D <sub>2</sub> O                           | 0.76% fuel/94.48% Ar/4.76% D <sub>2</sub> O                                     |        | 1.9                | 700             |
|                  | tetrahydrofuran/D <sub>2</sub> O                       | 0.76% fuel/94.48% Ar/4.76% D <sub>2</sub> O                                     |        | 1.9                | 700             |

**S1.2: Mass spectra of  $C_xH_{y-2}O_{z+n}$  ( $n=0-5$ ) and  $C_xH_{y-4}O_{z+n}$  ( $n=4$ ) in the 15 VOCs auto-oxidation**

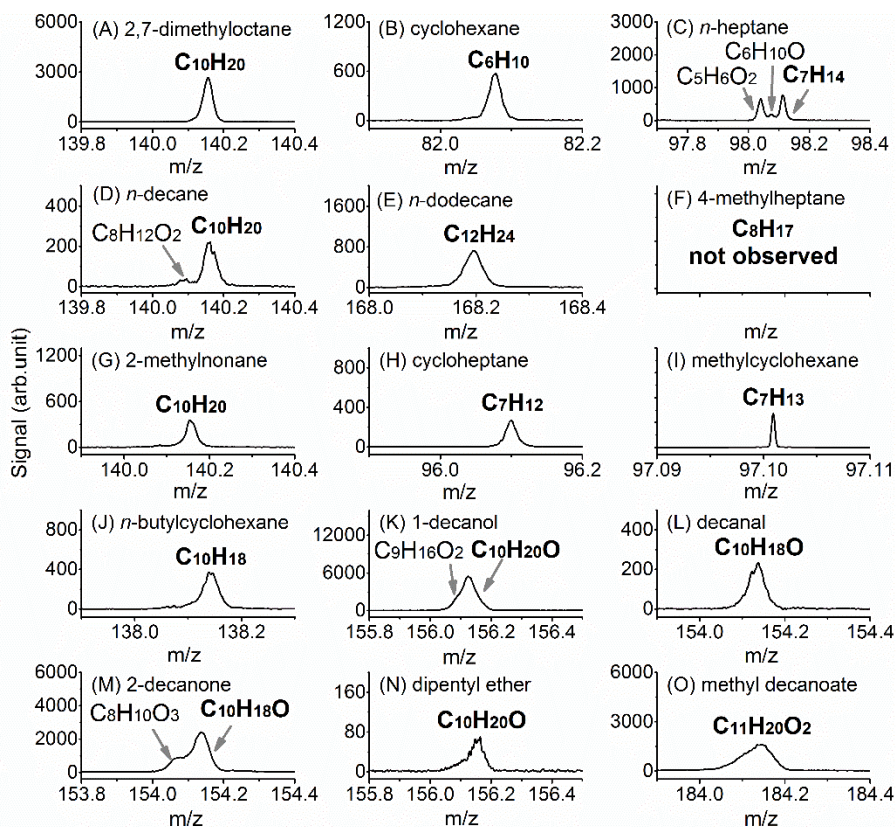

**Figure S2:** Mass spectrum recorded in oxidation of 15 organic compounds highlighting species with molecular formula of  $C_xH_{y-2}O_z$ . Data in (F) for 4-methylheptane and (I) for methylcyclohexane obtained from APCI-OTMS experiments, remainder are from SVUV-PI-MBMS experiments.  $x$  equals to the carbon number of the organic compounds;  $y$  is equal to  $2x+2$  for alkanes, alcohols, and ethers,  $2x$  for cycloalkanes, aldehydes, ketone compounds, and esters;  $z$  is equal to 0 for hydrocarbons, 1 for alcohols, aldehydes, ketone compounds, and ethers, and 2 for esters.

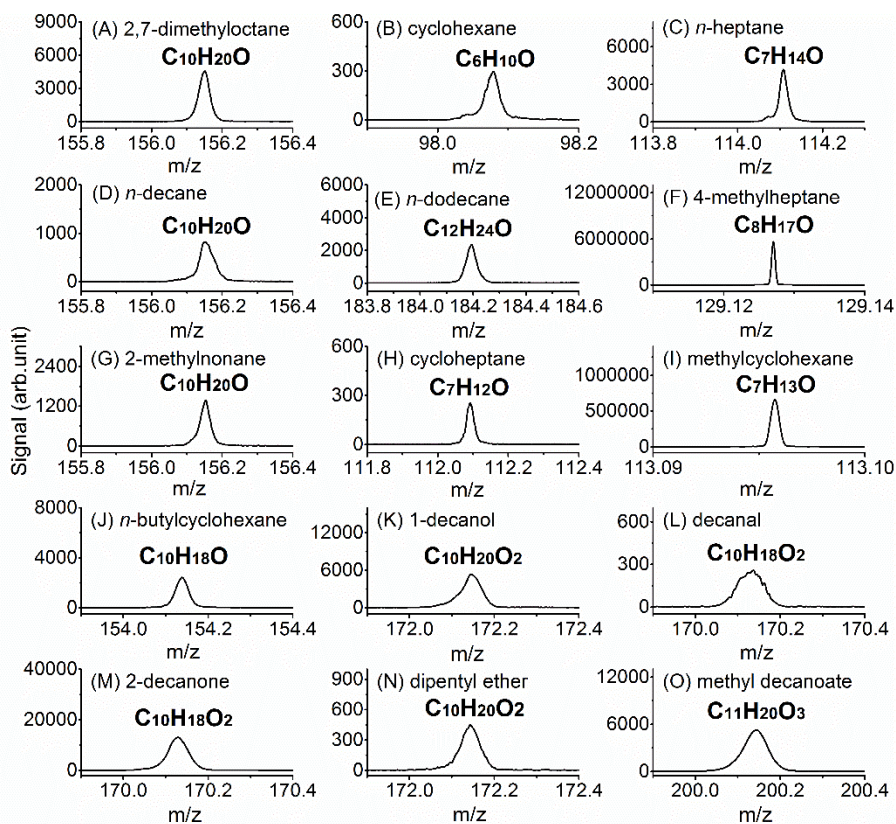

**Figure S3:** Mass spectrum recorded in oxidation of 15 organic compounds highlighting species with molecular formula of  $C_xH_{y-2}O_{z+1}$ . Data in (F) for 4-methylheptane and (I) for methylcyclohexane obtained from APCI-OTMS experiments, remainder are from SVUV-PI-MBMS experiments.  $x$  equals to the carbon number of the organic compounds;  $y$  is equal to  $2x+2$  for alkanes, alcohols, and ethers,  $2x$  for cycloalkanes, aldehydes, ketone compounds, and esters;  $z$  is equal to 0 for hydrocarbons, 1 for alcohols, aldehydes, ketone compounds, and ethers, and 2 for esters.



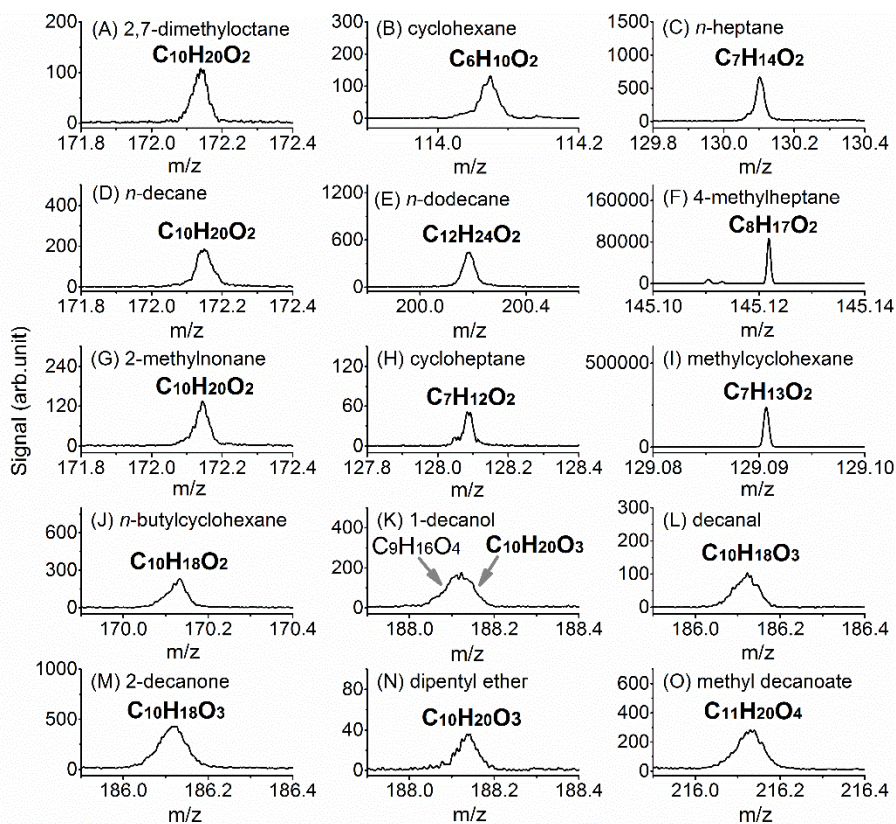

**Figure S4:** Mass spectrum recorded in oxidation of 15 organic compounds highlighting species with molecular formula of  $C_xH_{y-2}O_{z+2}$ . Data in (F) for 4-methylheptane and (I) for methylcyclohexane obtained from APCI-OTMS experiments, remainder are from SVUV-PI-MBMS experiments.  $x$  equals to the carbon number of the organic compounds;  $y$  is equal to  $2x+2$  for alkanes, alcohols, and ethers,  $2x$  for cycloalkanes, aldehydes, ketone compounds, and esters;  $z$  is equal to 0 for hydrocarbons, 1 for alcohols, aldehydes, ketone compounds, and ethers, and 2 for esters.

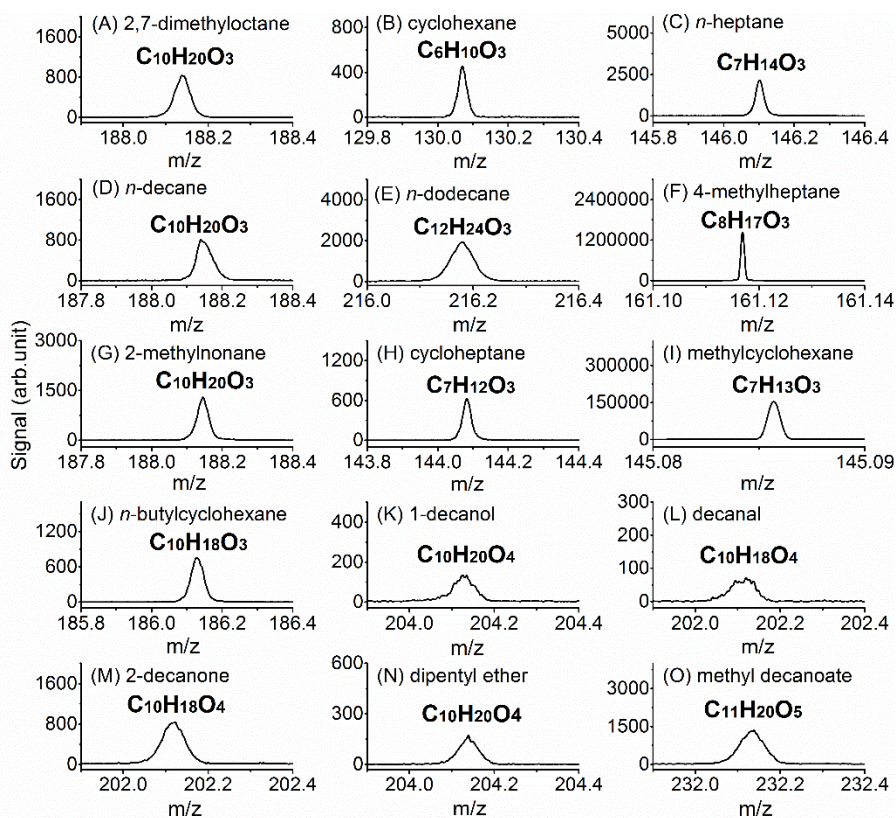

**Figure S5:** Mass spectrum recorded in oxidation of 15 organic compounds highlighting species with molecular formula of  $C_xH_{y-2}O_{z+3}$ . Data in (F) for 4-methylheptane and (I) for methylcyclohexane obtained from APCI-OTMS experiments, remainder are from SVUV-PI-MBMS experiments.  $x$  equals to the carbon number of the organic compounds;  $y$  is equal to  $2x+2$  for alkanes, alcohols, and ethers,  $2x$  for cycloalkanes, aldehydes, ketone compounds, and esters;  $z$  is equal to 0 for hydrocarbons, 1 for alcohols, aldehydes, ketone compounds, and ethers, and 2 for esters.

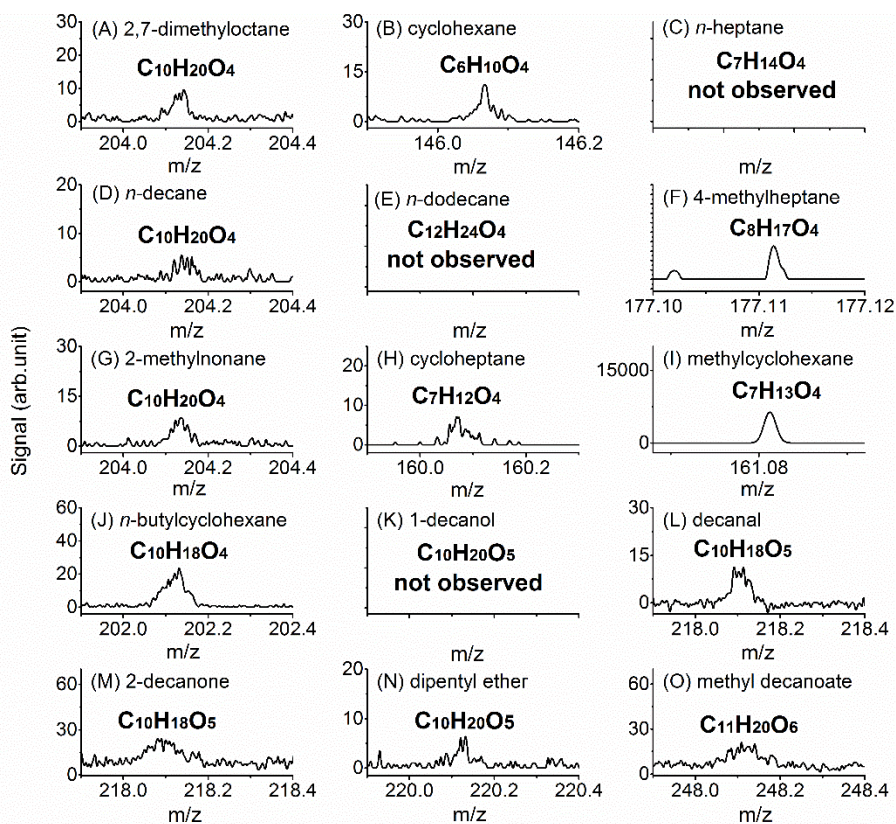

**Figure S6:** Mass spectrum recorded in oxidation of 15 organic compounds highlighting species with molecular formula of  $C_xH_{y-2}O_{z+4}$ . Data in (F) for 4-methylheptane and (I) for methylcyclohexane obtained from APCI-OTMS experiments, remainder are from SVUV-PI-MBMS experiments.  $x$  equals to the carbon number of the organic compounds;  $y$  is equal to  $2x+2$  for alkanes, alcohols, and ethers,  $2x$  for cycloalkanes, aldehydes, ketone compounds, and esters;  $z$  is equal to 0 for hydrocarbons, 1 for alcohols, aldehydes, ketone compounds, and ethers, and 2 for esters.

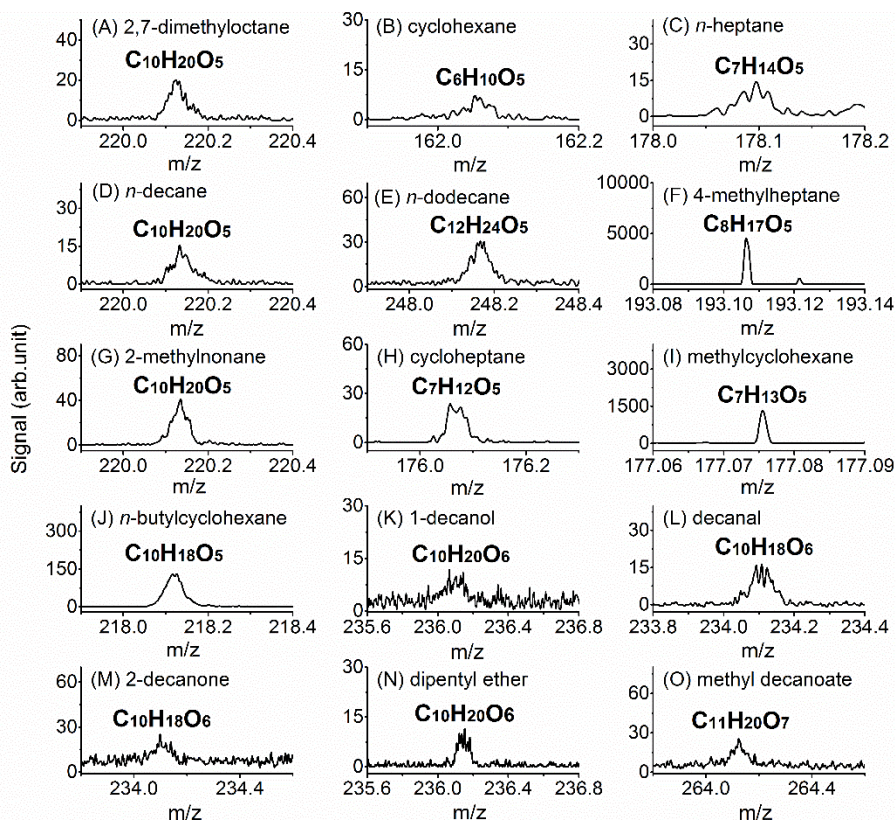

**Figure S7:** Mass spectrum recorded in oxidation of 15 organic compounds highlighting species with molecular formula of  $C_xH_{y-2}O_{z+5}$ . Data in (F) for 4-methylheptane and (I) for methylcyclohexane obtained from APCI-OTMS experiments, remainder are from SVUV-PI-MBMS experiments.  $x$  equals to the carbon number of the organic compounds;  $y$  is equal to  $2x+2$  for alkanes, alcohols, and ethers,  $2x$  for cycloalkanes, aldehydes, ketone compounds, and esters;  $z$  is equal to 0 for hydrocarbons, 1 for alcohols, aldehydes, ketone compounds, and ethers, and 2 for esters.

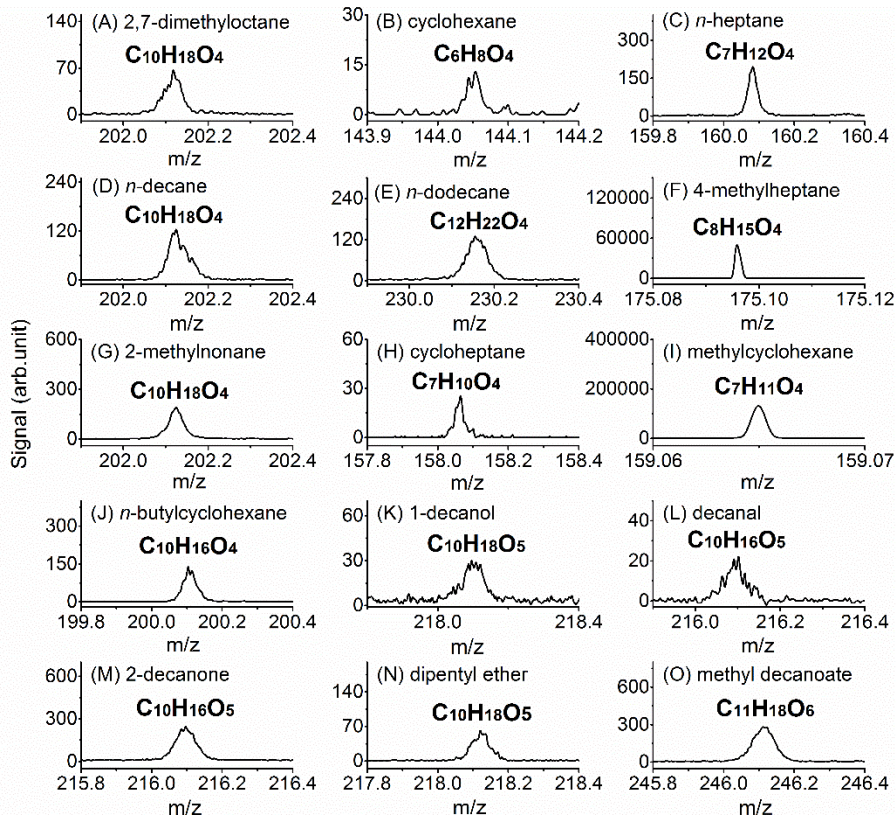

**Figure S8:** Mass spectrum recorded in oxidation of 15 organic compounds highlighting species with molecular formula of  $C_xH_{y-4}O_{z+4}$ . Data in (F) for 4-methylheptane and (I) for methylcyclohexane obtained from APCI-OTMS experiments, remainder are from SVUV-PI-MBMS experiments. x equals to the carbon number of the organic compounds; y is equal to  $2x+2$  for alkanes, alcohols, and ethers,  $2x$  for cycloalkanes, aldehydes, ketone compounds, and esters; z is equal to 0 for hydrocarbons, 1 for alcohols, aldehydes, ketone compounds, and ethers, and 2 for esters.

### S1.3: Glossary of species mentioned in the text

| Molecules            | Note                                                                                                                                                          | Example           | Structure |
|----------------------|---------------------------------------------------------------------------------------------------------------------------------------------------------------|-------------------|-----------|
| $C_xH_yO_z$          | VOC, x, y, z are the carbon, oxygen, and hydrogen number, respectively. The same for the following                                                            | $C_{10}H_{22}$    |           |
| $C_xH_{y-2}O_{z+0}$  | Olefins with the same carbon skeleton of VOC                                                                                                                  | $C_{10}H_{20}$    |           |
| $C_xH_{y-2}O_{z+1}$  | Cyclic ethers with the same carbon skeleton of VOC                                                                                                            | $C_{10}H_{20}O$   |           |
| $C_xH_{y-2}O_{z+2}$  | Olefinic hydroperoxides with the same carbon skeleton of VOC                                                                                                  | $C_{10}H_{20}O_2$ |           |
| $C_xH_{y-2}O_{z+3}$  | Keto-hydroperoxides and/or hydroperoxy cyclic ethers with the same carbon skeleton of VOC                                                                     | $C_{10}H_{20}O_3$ |           |
| $C_xH_{y-2}O_{z+4}$  | Olefinic dihydroperoxides with the same carbon skeleton of VOC                                                                                                | $C_{10}H_{20}O_4$ |           |
| $C_xH_{y-2}O_{z+5}$  | Keto-dihydroperoxides and/or dihydroperoxy cyclic ethers with the same carbon skeleton of VOC                                                                 | $C_{10}H_{20}O_5$ |           |
| $C_xH_{y-4}O_{z+4}$  | Diketo-hydroperoxides and/or keto-hydroperoxy cyclic ethers and/or dihydroperoxy dienes with the same carbon skeleton of VOC                                  | $C_{10}H_{18}O_4$ |           |
| $C_{10}H_{19}DO_3$   | Keto-hydroperoxides and/or hydroperoxy cyclic ethers with the same carbon skeleton of VOC. The H-atom in -OOH functional group was replaced by D atom         |                   |           |
| $C_{10}H_{17}DO_4$   | Diketo-hydroperoxides and/or keto-hydroperoxy cyclic ethers with the same carbon skeleton of VOC. The H-atom in -OOH functional group was replaced by D atom  |                   |           |
| $C_{10}H_{16}D_2O_4$ | Dihydroperoxy dienes with the same carbon skeleton of VOC. The H-atoms in -OOHs functional group were replaced by D atoms                                     |                   |           |
| $C_{10}H_{19}DO_5$   | Keto-dihydroperoxides and/or dihydroperoxy cyclic ethers with the same carbon skeleton of VOC. The H-atom in one -OOH functional group was replaced by D atom |                   |           |

|                      |                                                                                                                                                               |                         |                                                                                       |
|----------------------|---------------------------------------------------------------------------------------------------------------------------------------------------------------|-------------------------|---------------------------------------------------------------------------------------|
| $C_{10}H_{18}D_2O_5$ | Keto-dihydroperoxides and/or dihydroperoxy cyclic ethers with the same carbon skeleton of VOC. The H-atoms in –OOHs functional group were replaced by D atoms |                         | 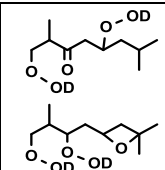   |
| $C_{10}H_{19}O^+$    | The plausible fragments of the primary ion $C_{10}H_{20}O_3^+$ after elimination of –OOH                                                                      |                         |    |
| $C_{10}H_{19}O_2^+$  | The plausible fragments of the primary ion $C_{10}H_{20}O_3^+$ through dissociation of the O–OH bond in the hydroperoxy group                                 |                         |    |
| $C_{10}H_{17}O_2^+$  | The plausible fragments of the primary ion $C_{10}H_{18}O_4^+$ after elimination of –OOH                                                                      |                         |    |
| $C_{10}H_{19}O_3^+$  | The plausible fragments of the primary ion $C_{10}H_{20}O_5^+$ after elimination of –OOH                                                                      |                         |    |
| $C_xH_{y-1}O_z$      | R radical, produced from the H-atom abstraction of VOC molecule $C_xH_yO_z$                                                                                   | $C_{10}H_{21}$          |   |
| $C_xH_{y-1}O_{z+2}$  | ROO radical--peroxy radical--, produced from the $O_2$ addition to R radical                                                                                  | $C_{10}H_{21}OO$        |  |
| $C_xH_{y-1}O_{z+2}$  | QOOH radical--hydroperoxyalkyl radical--, produced from the isomerization of ROO radical                                                                      | $C_{10}H_{20}OOH$       |  |
| $C_xH_{y-1}O_{z+4}$  | OOQOOH radical--hydroperoxyalkyl peroxy radical--, produced from the $O_2$ addition to QOOH radical                                                           | $OOC_{10}H_{20}OOH$     |  |
| $C_xH_{y-1}O_{z+4}$  | P(OOH) <sub>2</sub> radical--dihydroperoxyalkyl radical--, produced from the isomerization of OOQOOH radical                                                  | $HOOC_{10}H_{19}OOH$    |  |
| $C_xH_{y-1}O_{z+6}$  | OOP(OOH) <sub>2</sub> radical--dihydroperoxyalkyl peroxy radical--, produced from the $O_2$ addition to P(OOH) <sub>2</sub> radical                           | $OOC_{10}H_{19}(OOH)_2$ |  |
| $C_xH_{y-1}O_{z+6}$  | T(OOH) <sub>3</sub> radical--trihydroperoxyalkyl peroxy radical--, produced from the isomerization of OOP(OOH) <sub>2</sub> radical                           | $C_{10}H_{18}(OOH)_3$   |  |

### S1.4: Specific mechanism diagrams of 2,7-dimethyloctane and *n*-butylcyclohexane

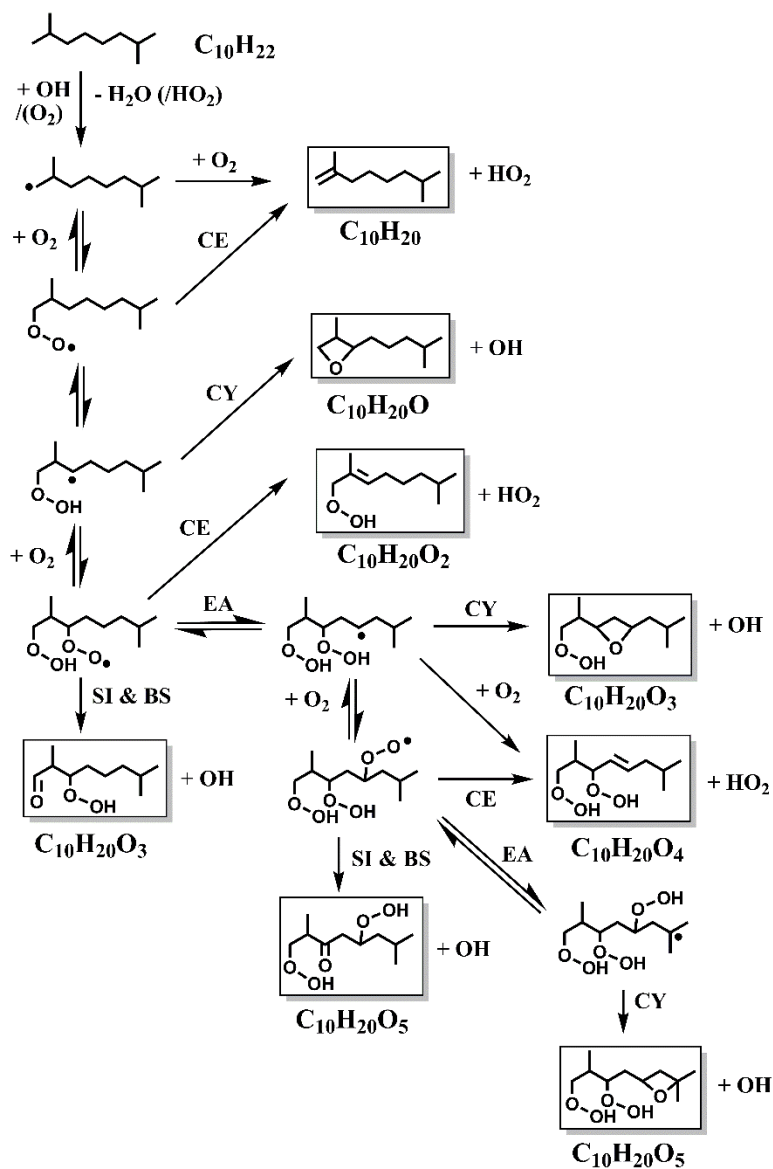

**Scheme S1:** Auto-oxidation mechanism of 2,7-dimethyloctane, leading to formation of intermediates with molecular formula of  $C_{10}H_{20}O_n$  ( $n=0-5$ , labeled in boxed). The structures of probable intermediates for auto-oxidation of 2,7-dimethyloctane radical at the primary carbon are presented. CE: concerted elimination, BS:  $\beta$ -scission, CY: cyclization, SI: standard isomerization, EA: extensive auto-oxidation.



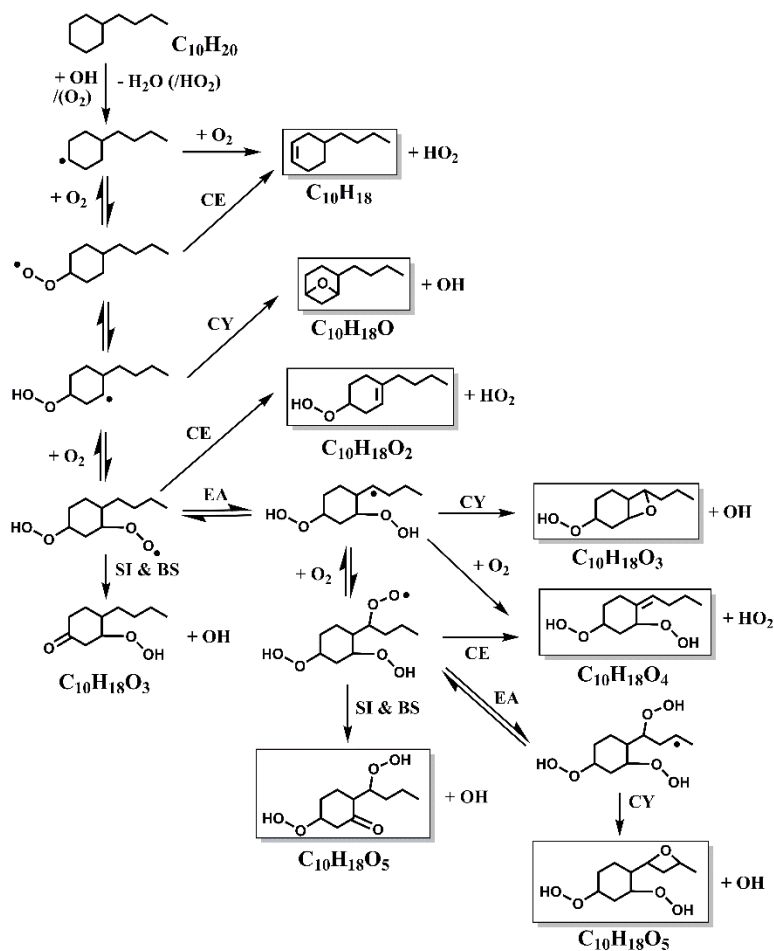

**Scheme S2:** Auto-oxidation mechanism of *n*-butylcyclohexane, leading to formation of intermediates with molecular formula of  $C_{10}H_{18}O_n$  ( $n=0-5$ , labeled in boxed). The structures of probable intermediates for auto-oxidation of *n*-butylcyclohexane radical at a second carbon are presented. CE: concerted elimination, BS:  $\beta$ -scission, CY: cyclization, SI: standard isomerization, EA: extensive auto-oxidation.

**S1.5: Mass spectra of highly oxygenated intermediates recorded in cyclohexane auto-oxidation**

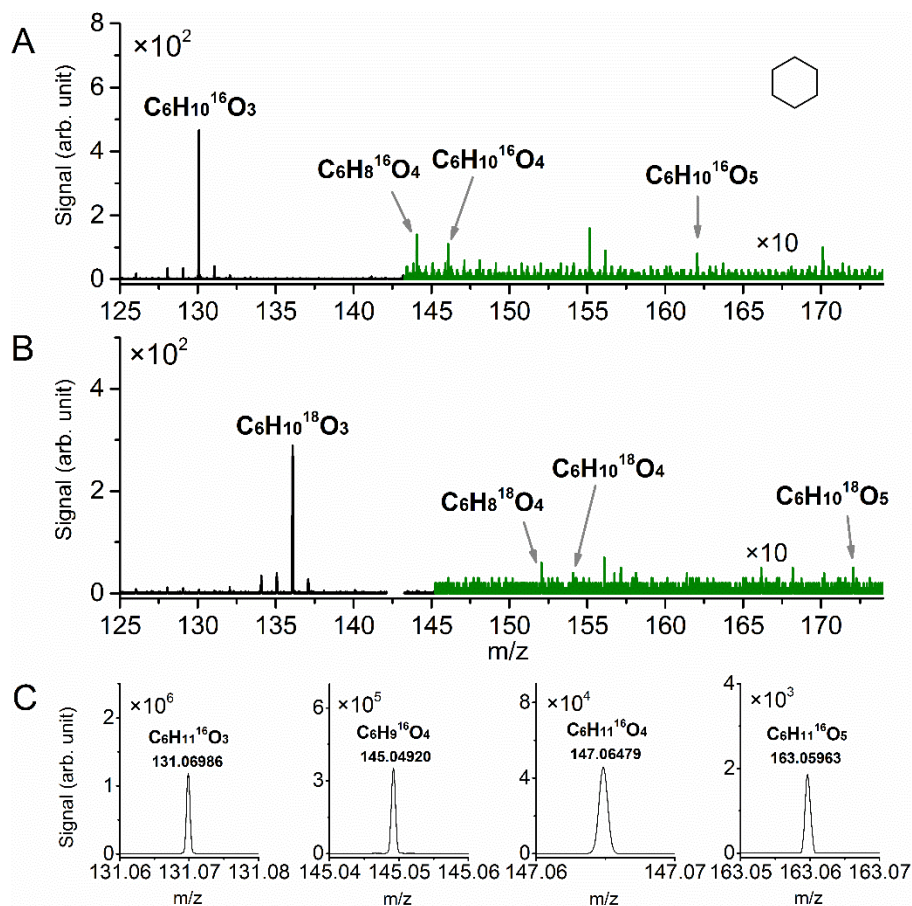

**Figure S9:** Mass spectra recorded in cyclohexane auto-oxidation. A, SVUV-PI-MBMS results at photon energy of 10.5 eV,  $^{16}\text{O}_2$  as the oxidizer, and equivalence ratio is 0.5. B, SVUV-PI-MBMS results at photon energy of 10.5 eV,  $^{18}\text{O}_2$  as the oxidizer, and equivalence ratio is 1.0. Mass zone (green in A and B) multiplied by ten for clarity, respectively. C, APCI-OTMS results with  $^{16}\text{O}_2$  as oxidizer. The protonated molecular ion peaks of highly oxygenated intermediates with three to five oxygens labeled with molecular formula and exact mass (accuracy < 5 ppm).

**S1.6: Temperature profiles of highly oxygenated intermediates and their fragments in 2,7-dimethyloctane oxidation.**

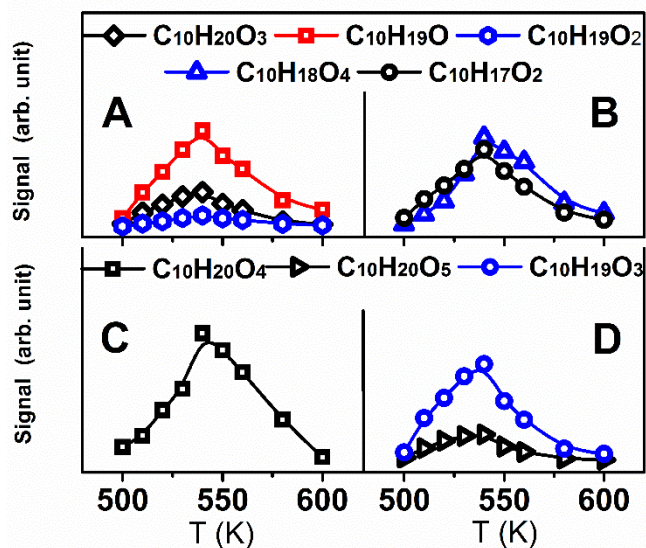

**Figure S10** Temperature-dependent signal profiles of  $C_{10}H_{20}O_3$  and fragments ( $C_{10}H_{19}O^+$  and  $C_{10}H_{19}O_2^+$ ),  $C_{10}H_{18}O_4$  and fragment ( $C_{10}H_{17}O_2^+$ ),  $C_{10}H_{20}O_4$ ,  $C_{10}H_{20}O_5$  and fragment ( $C_{10}H_{19}O_3^+$ ) measured in SVUV-PI-MBMS experiment of 2,7-dimethyloctane oxidation.

### S1.7: H/D exchange reactions

The experimental conditions for the H/D exchange reactions of D<sub>2</sub>O with 2,7-dimethyloctane, ethanol, propanal, acetone, tetrahydrofuran, methyl peroxide and hydrogen peroxide are shown in Table S1. The mass spectra in Figs. S11A-F show that only the *m/z* of ethanol and acetic acid is increased by one, after reacting with D<sub>2</sub>O. Fig. S11G presents the mass peak of CH<sub>3</sub>OOH and CH<sub>3</sub>OOD, and Fig. S11H presents the mass peaks of H<sub>2</sub>O<sub>2</sub>, HDO<sub>2</sub> and D<sub>2</sub>O<sub>2</sub>. The measured photoionization efficiency spectra of CH<sub>3</sub>OOD and CH<sub>3</sub>OOH are very close to those measured in the literature (6). Similarly, the photoionization efficiency spectra of H<sub>2</sub>O<sub>2</sub>, HDO<sub>2</sub>, and D<sub>2</sub>O<sub>2</sub> are very similar to those of pure H<sub>2</sub>O<sub>2</sub> (7).

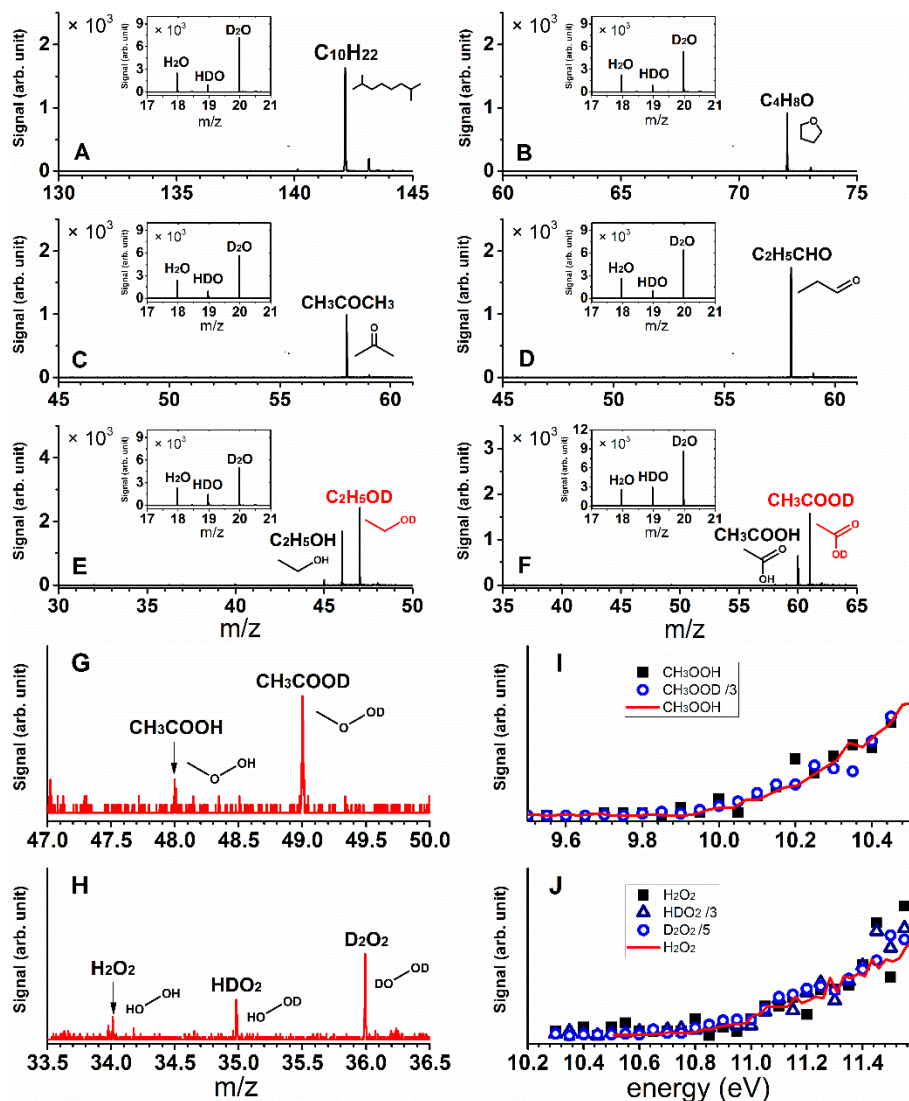

**Figure S11:** H/D exchange of alkane (A), cyclic ether (B), ketone (C), aldehyde (D), alcohol (E), acid (F), methylperoxide (G), and hydrogen peroxide (H) with D<sub>2</sub>O at 530 K. Inset in A-F shows H/D exchange of H<sub>2</sub>O and D<sub>2</sub>O during each measurement. H<sub>2</sub>O from background of reactor chamber. Methylperoxide and hydrogen peroxide produced during 2,7-dimethyloctane auto-oxidation (Table S1). Signal of CH<sub>3</sub>OOD, HDO<sub>2</sub>, and D<sub>2</sub>O<sub>2</sub> in (I) and (J) divided by 3, 3, and 5, respectively. Lines in (I) and (J) are PIE curves of methylperoxide (6) and hydrogen peroxide (7) in the literature.

## S1.8: Fragments analysis of highly oxygenated intermediates

**Table S2:** Fragments from highly oxygenated intermediates in SVUV-PI-MBMS experiments with auto-oxidation of 13 organic compounds. Ions formed by elimination of -OOH, or through dissociation of the O-OH bond in the hydroperoxy group.

| Organic compounds (C <sub>x</sub> H <sub>y</sub> O <sub>z</sub> ) <sup>a</sup> | C <sub>x</sub> H <sub>y-2</sub> O <sub>z+3</sub>                                     | C <sub>x</sub> H <sub>y-2</sub> O <sub>z+3</sub>                              | C <sub>x</sub> H <sub>y-4</sub> O <sub>z+4</sub>                              | C <sub>x</sub> H <sub>y-2</sub> O <sub>z+5</sub>                              |
|--------------------------------------------------------------------------------|--------------------------------------------------------------------------------------|-------------------------------------------------------------------------------|-------------------------------------------------------------------------------|-------------------------------------------------------------------------------|
| Fragment pattern                                                               | break of -O-OH bond<br>C <sub>x</sub> H <sub>y-3</sub> O <sub>z+2</sub> <sup>+</sup> | loss of -OOH<br>C <sub>x</sub> H <sub>y-3</sub> O <sub>z+1</sub> <sup>+</sup> | loss of -OOH<br>C <sub>x</sub> H <sub>y-5</sub> O <sub>z+2</sub> <sup>+</sup> | loss of -OOH<br>C <sub>x</sub> H <sub>y-3</sub> O <sub>z+3</sub> <sup>+</sup> |
| 2,7-dimethyloctane (C <sub>10</sub> H <sub>24</sub> )                          | C <sub>10</sub> H <sub>19</sub> O <sub>2</sub> <sup>+</sup>                          | C <sub>10</sub> H <sub>19</sub> O <sup>+</sup>                                | C <sub>10</sub> H <sub>17</sub> O <sub>2</sub> <sup>+</sup>                   | C <sub>10</sub> H <sub>19</sub> O <sub>3</sub> <sup>+</sup>                   |
| cyclohexane (C <sub>6</sub> H <sub>12</sub> )                                  | C <sub>6</sub> H <sub>9</sub> O <sub>2</sub> <sup>+</sup>                            | C <sub>6</sub> H <sub>9</sub> O <sup>+</sup>                                  | C <sub>6</sub> H <sub>7</sub> O <sub>2</sub> <sup>+</sup>                     | C <sub>6</sub> H <sub>9</sub> O <sub>3</sub> <sup>+</sup>                     |
| <i>n</i> -heptane (C <sub>7</sub> H <sub>16</sub> )                            | C <sub>7</sub> H <sub>13</sub> O <sub>2</sub> <sup>+</sup>                           | C <sub>7</sub> H <sub>13</sub> O <sup>+</sup>                                 | C <sub>7</sub> H <sub>11</sub> O <sub>2</sub> <sup>+</sup>                    | C <sub>7</sub> H <sub>13</sub> O <sub>3</sub> <sup>+</sup>                    |
| <i>n</i> -decane (C <sub>10</sub> H <sub>22</sub> )                            | C <sub>10</sub> H <sub>19</sub> O <sub>2</sub> <sup>+</sup>                          | C <sub>10</sub> H <sub>19</sub> O <sup>+</sup>                                | C <sub>10</sub> H <sub>17</sub> O <sub>2</sub> <sup>+</sup>                   | C <sub>10</sub> H <sub>19</sub> O <sub>3</sub> <sup>+</sup>                   |
| <i>n</i> -dodecane (C <sub>12</sub> H <sub>26</sub> )                          | C <sub>12</sub> H <sub>23</sub> O <sub>2</sub> <sup>+</sup>                          | C <sub>12</sub> H <sub>23</sub> O <sup>+</sup>                                | C <sub>12</sub> H <sub>21</sub> O <sub>2</sub> <sup>+</sup>                   | C <sub>12</sub> H <sub>23</sub> O <sub>3</sub> <sup>+</sup>                   |
| 2-methylnonane (C <sub>10</sub> H <sub>22</sub> )                              | C <sub>10</sub> H <sub>19</sub> O <sub>2</sub> <sup>+</sup>                          | C <sub>10</sub> H <sub>19</sub> O <sup>+</sup>                                | C <sub>10</sub> H <sub>17</sub> O <sub>2</sub> <sup>+</sup>                   | C <sub>10</sub> H <sub>19</sub> O <sub>3</sub> <sup>+</sup>                   |
| cycloheptane (C <sub>7</sub> H <sub>14</sub> )                                 | C <sub>7</sub> H <sub>11</sub> O <sub>2</sub> <sup>+</sup>                           | C <sub>7</sub> H <sub>11</sub> O <sup>+</sup>                                 | C <sub>7</sub> H <sub>9</sub> O <sub>2</sub> <sup>+</sup>                     | C <sub>7</sub> H <sub>11</sub> O <sub>3</sub> <sup>+</sup>                    |
| <i>n</i> -butylcyclohexane (C <sub>10</sub> H <sub>20</sub> )                  | C <sub>10</sub> H <sub>17</sub> O <sub>2</sub> <sup>+</sup>                          | C <sub>10</sub> H <sub>17</sub> O <sup>+</sup>                                | C <sub>10</sub> H <sub>15</sub> O <sub>2</sub> <sup>+</sup>                   | C <sub>10</sub> H <sub>17</sub> O <sub>3</sub> <sup>+</sup>                   |
| 1-decanol (C <sub>10</sub> H <sub>22</sub> O)                                  | C <sub>10</sub> H <sub>19</sub> O <sub>3</sub> <sup>+</sup>                          | C <sub>10</sub> H <sub>19</sub> O <sub>2</sub> <sup>+</sup>                   | C <sub>10</sub> H <sub>17</sub> O <sub>3</sub> <sup>+</sup>                   | C <sub>10</sub> H <sub>19</sub> O <sub>4</sub> <sup>+</sup>                   |
| decanal (C <sub>10</sub> H <sub>20</sub> O)                                    | C <sub>10</sub> H <sub>17</sub> O <sub>3</sub> <sup>+</sup>                          | C <sub>10</sub> H <sub>17</sub> O <sub>2</sub> <sup>+</sup>                   | C <sub>10</sub> H <sub>15</sub> O <sub>3</sub> <sup>+</sup>                   | C <sub>10</sub> H <sub>17</sub> O <sub>4</sub> <sup>+</sup>                   |
| 2-decanone (C <sub>10</sub> H <sub>20</sub> O)                                 | C <sub>10</sub> H <sub>17</sub> O <sub>3</sub> <sup>+</sup>                          | C <sub>10</sub> H <sub>17</sub> O <sub>2</sub> <sup>+</sup>                   | C <sub>10</sub> H <sub>15</sub> O <sub>3</sub> <sup>+</sup>                   | C <sub>10</sub> H <sub>17</sub> O <sub>4</sub> <sup>+</sup>                   |
| dipentyl ether (C <sub>10</sub> H <sub>22</sub> O)                             | C <sub>10</sub> H <sub>19</sub> O <sub>3</sub> <sup>+</sup>                          | C <sub>10</sub> H <sub>19</sub> O <sub>2</sub> <sup>+</sup>                   | C <sub>10</sub> H <sub>17</sub> O <sub>3</sub> <sup>+</sup>                   | C <sub>10</sub> H <sub>19</sub> O <sub>4</sub> <sup>+</sup>                   |
| methyl decanoate (C <sub>11</sub> H <sub>22</sub> O <sub>2</sub> )             | C <sub>11</sub> H <sub>19</sub> O <sub>4</sub> <sup>+</sup>                          | C <sub>11</sub> H <sub>19</sub> O <sub>3</sub> <sup>+</sup>                   | C <sub>11</sub> H <sub>17</sub> O <sub>4</sub> <sup>+</sup>                   | C <sub>11</sub> H <sub>19</sub> O <sub>5</sub> <sup>+</sup>                   |

Note: <sup>a</sup> x equals to carbon number of organic compounds; y is equal to 2x+2 for alkanes, alcohols, and ethers, 2x for cycloalkanes, aldehydes, ketone compounds, and esters; z is equal to 0 for hydrocarbons, 1 for alcohols, aldehydes, ketone compounds, and ethers, and 2 for esters.

### S1.9: Relative ratio of $C_xH_{y-2}O_5$ to $C_xH_{y-2}O_3$

The total photoionization efficiency curve of  $C_xH_{y-2}O_5$  and  $C_xH_{y-2}O_3$  was obtained by including the signals of the parent ion and their fragments. Previous work of 2,5-dimethylhexane (8) shows that the dominant fragments are those occurring from the loss of  $-OOH$ , and the contribution from other fragments is less important at 9.5 eV. Here, focus was on the fragments from the loss of  $-OOH$  and the dissociation of O-OH bond in the hydroperoxy functional group. Neglecting the smaller fragments may increase the uncertainty of the relative ratios, but it will not affect our conclusions. For  $C_xH_{y-2}O_3$  intermediates specifically, its total photoionization efficiency curve is the summation of the signal of  $C_xH_{y-2}O_3$ ,  $C_xH_{y-3}O$  (from the loss of  $-OOH$ ), and  $C_xH_{y-3}O_2$  (from the dissociation of O-OH bond in the hydroperoxy functional group). For the total photoionization efficiency curve of  $C_xH_{y-2}O_5$  intermediates, only the summation of the signal of  $C_xH_{y-2}O_5$  and  $C_xH_{y-3}O_3$  (from the loss of  $-OOH$ ) is considered. In most cases, the signal intensity of  $C_xH_{y-3}O_4$  (from the dissociation of O-OH bond in the hydroperoxy functional group) is very low.

As shown in Fig. S12, the photoionization efficiency from 8.75 eV to 9.75 eV is very similar for  $C_xH_{y-2}O_5$  and  $C_xH_{y-2}O_3$ , highly oxygenated intermediates produced from the oxidation of eight hydrocarbons. Note that loss of the ionized  $C_xH_{y-2}O_3$  from the H atoms could also contribute to the signal of  $C_xH_{y-3}O_3$ , as well as the fragment of  $C_xH_{y-2}O_5$  from the loss of  $-OOH$ . However, previous work on 2,5-dimethylhexane oxidation shows that the appearance energy of the dissociation products from the loss of the ionized  $C_xH_{y-2}O_3$  in the H atoms is in the range of 10.3-12.7 eV (8), so it is unlikely that they contribute to the signal of  $C_xH_{y-3}O_3$  below 9.75 eV.

Given the similar photoionization efficiency curve of  $C_nH_{2n-2}O_5$  and  $C_nH_{2n-2}O_3$ , it is assumed that the ratio of the total photoionization cross section of  $C_xH_{y-2}O_5$  to  $C_xH_{y-2}O_3$  is the same at 9.5, or 9.6 eV, for all the hydrocarbons studied here. The relative ratios of  $C_xH_{y-2}O_5$  to  $C_xH_{y-2}O_3$  were then calculated from the total signal intensity of  $C_xH_{y-2}O_5$  to  $C_xH_{y-2}O_3$  at the temperature corresponding to their maximum formation. The total signal intensity of  $C_xH_{y-2}O_5$  and  $C_xH_{y-2}O_3$  was acquired using the same method used to determine the total photoionization efficiency curve. The photon energy was 9.5 eV for 2-methylhexane, 2-methylnonane, *n*-decane, 2,5-dimethylhexane, 2,7-dimethyloctane, cycloheptane, and *n*-butylcyclohexane auto-oxidation. In the case of *n*-heptane, the photon energy was 9.6 eV.

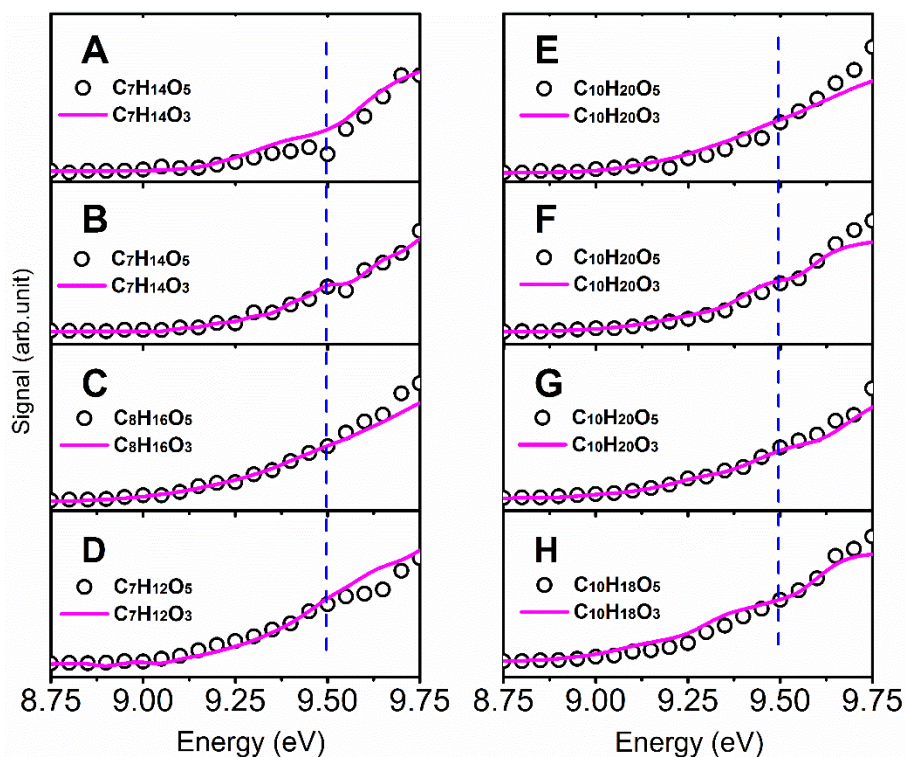

**A:** *n*-heptane; **B:** 2-methylhexane; **C:** 2,5-dimethylhexane  
**D:** cycloheptane; **E:** *n*-decane; **F:** 2-methylnonane  
**G:** 2,7-dimethyloctane; **H:** *n*-butylcyclohexane

**Figure S12:** Total photoionization efficiency curves of  $C_xH_{y-2}O_5$  and  $C_xH_{y-2}O_3$  from 8.75 to 9.75 eV for eight hydrocarbons. Blue lines mark signals at 9.5 eV. Data of 2-methylhexane and 2,5-dimethylhexane from Wang *et al.* (8, 9)



## Section 2: Quantum chemistry calculation

### S2.1: Detailed kinetic analysis of $\alpha,\beta$ -OOQOOH radical (A, B, and C in Figure 5) from *n*-decane and 2-methylnonane auto-oxidation

In this section, the kinetics for the EA and standard isomerization of  $\alpha,\beta$ -OOQOOH radical was investigated (A, B, C in Fig. 5). The geometry of the reactants, products, and transition states were optimized at the B3LYP/6-31+G(d,p) level of theory and the total energy of all species were calculated at the same level of theory. The B3LYP/6-31+G(d,p) level of theory is a computationally affordable and economical method for the very large system (i.e., 14 or more heavy atoms) investigated in this work. The purpose of this kinetic analysis was to provide general insight into the effect of the type of C-H bond (e.g., primary, secondary, and tertiary) on the EA pathways. All values were calculated at standard state of 298 K and 1 bar. All calculations were performed using the Gaussian 09 software package (10). “j” stands for the radical site in the species. Figures S18-S20 show the lowest energy conformer of the three target reactants and their derived transition states (TS) and products. Detailed geometry parameters and frequencies are listed in Tables S5 and S6.

The standard enthalpies of formation for the TS structures in the ketohydroperoxide + OH pathways were calculated from those of the corresponding reactant and the energy difference between the TS structure and the reactant. The standard enthalpies of formation of the TS structures in the isomerization pathways were taken as an average from the energy difference between the TS and the reactant and the energy difference between the TS and the product. The enthalpy of formation for reactants (A, B, and C) and products (AP1, AP2, BP1, BP2, CP1, and CP2) were determined using the group additivity method (11). Tables S7 and S8 list the groups and their corresponding thermodynamic property values for target species.

Entropy and heat capacity contributions as a function of temperature were determined from the calculated structures; moments of inertia, vibrational frequencies, symmetry, electron degeneracy, number of optical isomers, and the known mass of each species were considered. The calculations used standard formulas from statistical mechanics for the contributions of translation, external rotation, and vibrations by using the SMCPS program (12). Contributions from internal rotors using Rotator (13) were substituted for contributions from the corresponding internal rotor torsion frequencies. Rotator is a program for the calculation of thermodynamic

functions from hindered rotations, with arbitrary potentials based on a method developed by Lay *et al.* This technique employs the expansion of the hindrance potential in the Fourier series, calculation of the Hamiltonian matrix based on wave functions of free internal rotation, and subsequent calculation of energy levels by direct diagonalization of the Hamiltonian matrix. Rotation barriers higher than 7 kcal/mol were treated as harmonic oscillators. Rotation barriers less than 7 kcal/mol, but higher than 0.5 kcal/mol, were treated as anharmonic oscillators. Rotation barriers less than 0.5 kcal/mol were treated as free rotors. Table S9 summarizes the considered reactions along with the corresponding energy barrier for each pathway.

The calculated  $\Delta H^\ddagger$  and  $\Delta S^\ddagger$  at 298 K for the EA and standard isomerization reactions of the A, B and C structures of the OOQOOH radical are presented in Fig. 5. First, for molecules A, B, and C, the activation energy difference between the EA channel and standard isomerization channel was -1.5, 1.0, and -3.0 kcal/mol, respectively. The activation energy differences from 300 to 800 K were close to those at 298 K (Figs. S13A, B, and C). Based on the calculated energy barriers, EA was favorable for molecules A and C, while standard isomerization was favorable for molecule B. In addition, for molecules A, B, and C, the entropy difference between the EA channel and standard isomerization channel was -0.7, 0.6, and 4.4 cal/mol/K, respectively. The entropy differences from 300 to 800 K were also close to those at 298 K (Figs. S13A', 2B', and 2C'). The entropy calculations indicated that EA was favorable for molecules B and C, while standard isomerization was favorable for molecule A. However, the entropy differences for molecules A and B were small and not expected to have a substantial effect on the rate constant. In summary: (1) EA of OOQOOH radicals A, B and C were feasible, and (2) EA of OOQOOH, by abstracting the tertiary C-H, were more favorable than EA by abstracting the primary and secondary C-Hs, because of the lower energy barrier and higher entropy difference of the transition state in the former.

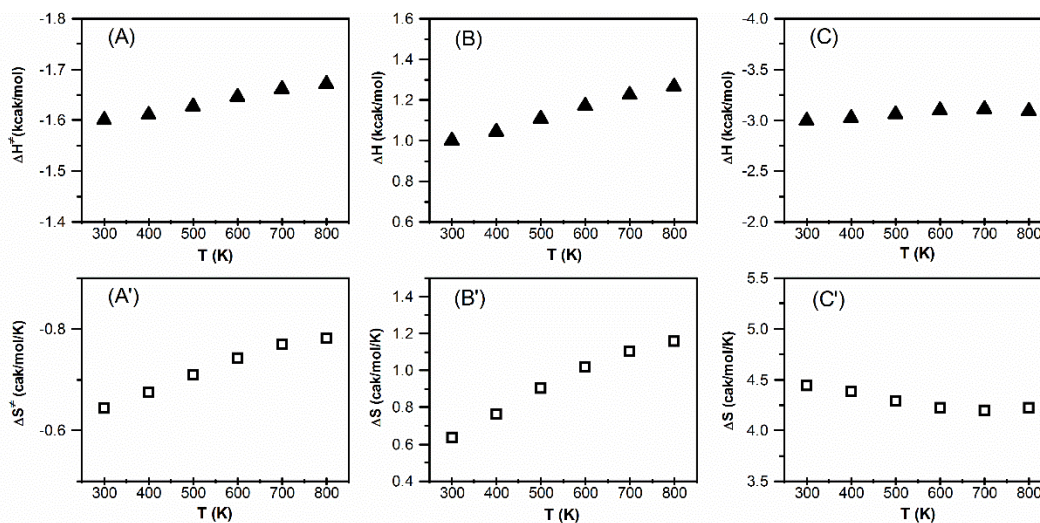

**Figure S13:** (A-C) activation energy difference between extensive auto-oxidation and standard isomerization for molecules A, B, and C in Fig. 5. The unit is kcal/mol. (A'-C') entropy difference between extensive auto-oxidation and standard isomerization for molecules A, B, and C in Fig. 5. The unit is cal/mol/K. The temperature range is 300-800 K.

Conversely, the equilibrium constant of the EA of the OOQOOH radical by abstracting at the tertiary C-H (molecule C in Fig. 5) is higher than that for secondary C-H (molecule A and B in Fig. 5), as shown in Fig. S14. The reason for this behavior is the higher stability of the P(OOH)<sub>2</sub> radical from the EA of OOQOOH by abstracting the tertiary C-H than that the P(OOH)<sub>2</sub> radicals with the radical site at primary and secondary carbons. Thus, in addition to kinetic favorability, the EA by abstracting the tertiary C-H of the OOQOOH radical is also thermodynamically favorable compared to its EA by abstracting the primary and secondary C-Hs. The aforementioned analysis is agreement with experimental observations in Fig. 4 of the manuscript. Kinetic analysis with pressure dependence was not performed in this work because pressure dependence was expected to be minimal for the very large system in Fig. 5, as a result of the large number of degrees of freedom. For example, the pressure dependence of the rate constant for the RO<sub>2</sub> isomerization in cyclohexane oxidation changed only within a factor of two between the high-pressure limit and the value at 1 bar in the temperature range of 500-800 K (14).

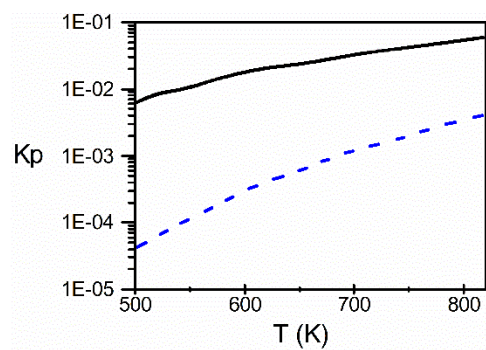

**Fig. S14:** Equilibrium constant of  $\alpha,\beta$ -OOQOOH radical's extensive auto-oxidation by abstracting a tertiary C-H (molecule C in Fig. 5, solid line) and secondary C-H (molecule B in Fig. 5, dashed line).

## S2.2: Potential energy surface of $\alpha,\beta$ -OOQOOH radical (E in Figure 5) in cyclohexane auto-oxidation

In this section, the potential energy surface for the  $\alpha,\beta$ -OOQOOH radical was calculated ( $\alpha$  is the position of the  $-\text{OO}$  group while  $\gamma$  is the position of the  $-\text{OOH}$  group), the most important OOQOOH radical in cyclohexane oxidation. Geometries and frequencies of reactant, products, and transition states of hydroperoxy-cyclohexylperoxy were characterized at the B3LYP/6-311++G(d,p) level of theory. The absence of imaginary frequencies verified that all stable structures were true minima at their respective levels of theory. Transition states are characterized as having only one negative eigenvalue of Hessian (force constant) matrices. Optimized geometries and calculated frequencies are presented in Tables S10 and S11. Single point energies of the optimized structures were calculated using the composite CBS-QB3 method (15). All calculations were performed using the Gaussian 09 software package (10).

Standard enthalpies of formation for each species in the potential energy diagram were determined by building isodesmic work reactions. Detailed information regarding work reactions and standard enthalpy of formation for the reference species are presented in Table S12.

Because it is the lowest among other cyclic conformers (16), the chair conformer was used here. Hydroperoxy and peroxy groups in hydroperoxy-cyclohexylperoxy can be in four different conformers: axial-axial, axial-equatorial, equatorial-axial and equatorial-equatorial, respectively. Theoretically, stereochemistry predicts the eq-eq conformer; it is the most stable conformer since the bulky groups point away from each other to avoid a steric effect. However, in this case, the ax-ax conformer was determined to be the most stable, the result of the hydrogen bonding effect between the hydroperoxy and peroxy group.

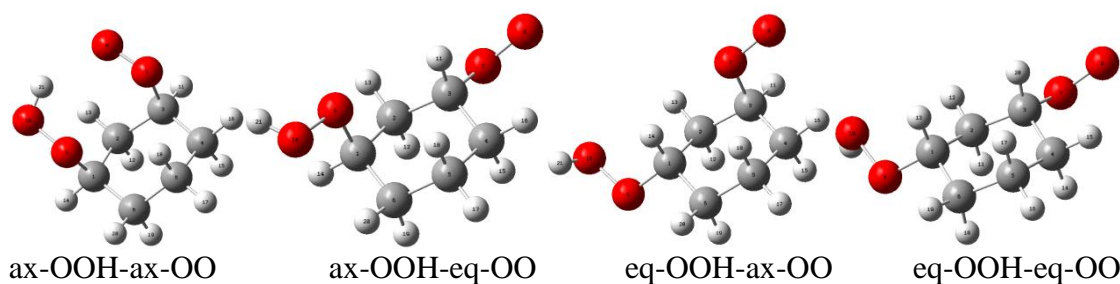

**Figure S15:** Optimized structures of four hydroperoxy-cyclohexylperoxy ( $\alpha,\gamma$ -OOQOOH) conformers in cyclohexane auto-oxidation

**Table S3:** Relative total energies of hydroperoxy-cyclohexylperoxy ( $\alpha,\gamma$ -OOQOOH) for different conformers in cyclohexane auto-oxidation at the CBS-QB3 level of theory

| Conformers              | Relative total energy in kcal mol <sup>-1</sup> |
|-------------------------|-------------------------------------------------|
| ax-OOH-cyclohexyl-ax-OO | 0                                               |
| ax-OOH-cyclohexyl-eq-OO | 0.9                                             |
| eq-OOH-cyclohexyl-ax-OO | 1.0                                             |
| eq-OOH-cyclohexyl-eq-OO | 1.5                                             |

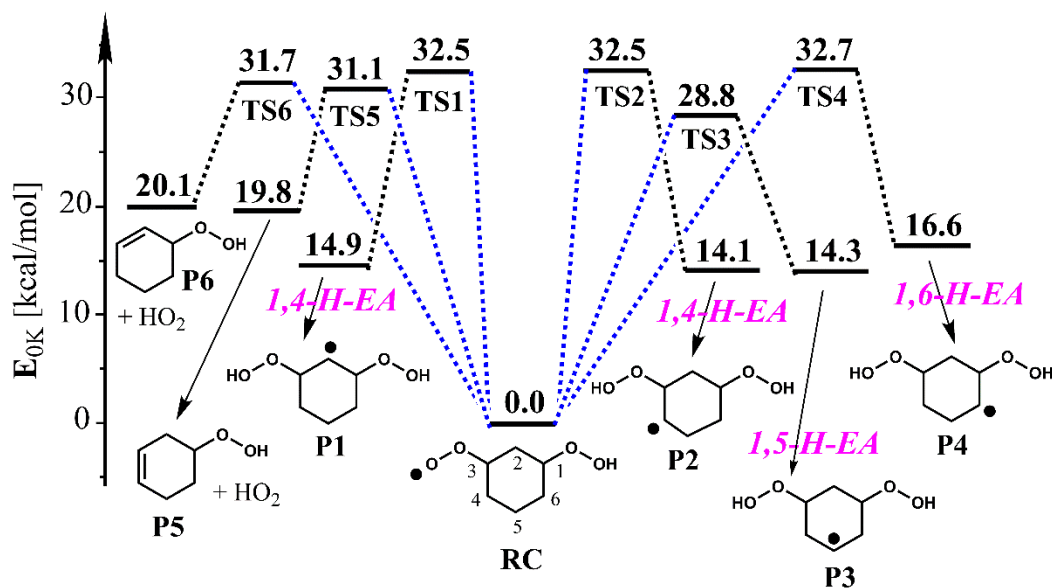

**Figure S16:** Potential energy surface of ax-hydroperoxy-cyclohexyl-ax-peroxy (ax-OOH-ax-OO) from cyclohexane auto-oxidation. (EA: extensive auto-oxidation)

### Section 3: Kinetic modeling for third O<sub>2</sub> addition pathways

Third O<sub>2</sub> addition pathways, and subsequent reactions leading to C<sub>7</sub>H<sub>14</sub>O<sub>5</sub> (keto-dihydroperoxide and dihydroperoxy cyclic ether), were incorporated with C<sub>7</sub>H<sub>12</sub>O<sub>4</sub> (diketo-hydroperoxide and keto-hydroperoxy cyclic ether) species, into a recent *n*-heptane kinetic model (17). The rate rules utilized for the third O<sub>2</sub> addition reaction mechanism (9) are shown in Table S4. Simulations were performed at 1 bar and 50 bar, equivalence ratio of 0.5, and in a temperature range from 575 K-800 K with the homogenous batch reactor in the CHEMKIN PRO software (18). The composition of the unburnt mixture was 0.02 heptane/ 0.44 O<sub>2</sub>/ 0.54 N<sub>2</sub>. The addition of third O<sub>2</sub> addition pathways in the *n*-heptane model decreased ignition delay times. Results in Fig. S17 reveal that (i) the effect of third O<sub>2</sub> addition pathways on the ignition delay time was more evident at lower temperatures; (ii) the effect of third O<sub>2</sub> addition pathways on the ignition delay time was more apparent at higher pressures; correspondingly, the ratio of 5O to 3O species was higher at higher pressure. For example, a reduction of the ignition delay time of about 20% was noted at 1 bar, and of 60% at 50 bar, at a temperature of 600 K.

**Table S4:** Rate rules utilized for the third O<sub>2</sub> addition reaction mechanism in *n*-heptane kinetic model.

| Reactions                                        | Reaction type             | Analogous Reaction            | Example                                                                               |
|--------------------------------------------------|---------------------------|-------------------------------|---------------------------------------------------------------------------------------|
| $O_2 + P(OOH)_2 = OOP(OOH)_2$                    | O <sub>2</sub> addition   | $O_2 + QOOH = OOQOOH$         | 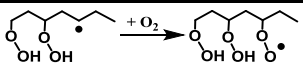 |
| $OOP(OOH)_2 = ODHP + HO_2$                       | Concerted elimination     | $OOQOOH = OHP + HO_2$         |  |
| $OOP(OOH)_2 = KDHP + OH$                         | H-migration, β-scission   | $OOQOOH = KHP + OH$           |  |
| $OOP(OOH)_2 = T(OOH)_3$                          | H-migration               | $OOQOOH = P(OOH)_2$           |  |
| $T(OOH)_3 = DHPCE + OH$                          | Cyclization               | $P(OOH)_2 = HPCE + OH$        |  |
| $T(OOH)_3 = ODHP + HO_2$                         | C-O β-scission            | $P(OOH)_2 = OHP + HO_2$       |  |
| $KDHP + OH = H_2O + OH + DKHP$                   | H-abstraction, β-scission | $KHP + OH = H_2O + OH + DKET$ |  |
| $DHPCE + OH = H_2O + OH + KHPCE$                 | H-abstraction, β-scission | $KHP + OH = H_2O + OH + DKET$ |  |
| ODHP, KDHP, DHPCE, DKHP, and KHPCE decomposition | -OOH dissociation         | KHP = products                |  |

Note: ODHP: olefinic dihydroperoxide; KDHP: keto-dihydroperoxide; DHPCE: dihydroperoxy cyclic ether; DKHP: diketo-hydroperoxide; KHPCE: keto-hydroperoxy cyclic ether; KHP: keto-hydroperoxide; DKET: diketo compound

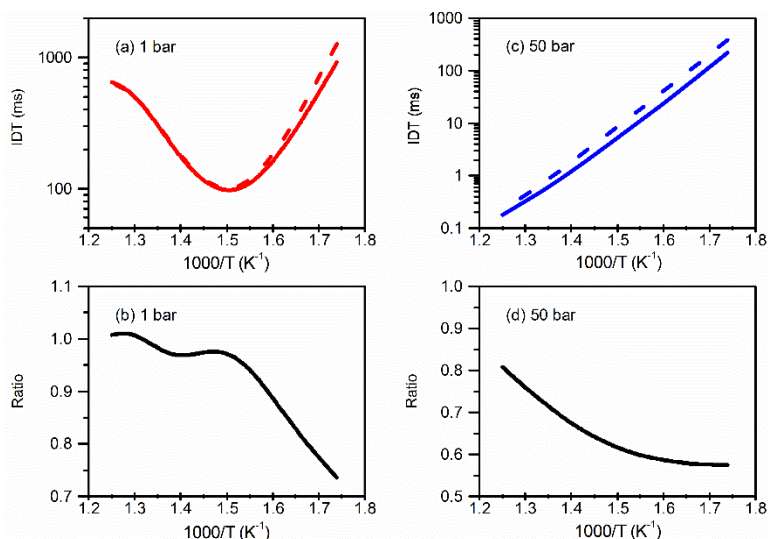

**Figure S17:** Ignition delay times for *n*-heptane/ $O_2$ / $N_2$  mixtures at  $\phi = 0.5$  and 50 bar. (a) Red dashed line and red solid line indicate ignition delay times obtained by simulation without third  $O_2$  addition reactions and simulation with third  $O_2$  addition reactions at 1 bar, respectively; (b) ratio of ignition delay time with third  $O_2$  addition reactions to ignition delay time without third  $O_2$  addition reactions at 1 bar. (c) Blue dashed line and blue solid line indicate ignition delay times obtained by simulation without third  $O_2$  addition reactions and simulation with third  $O_2$  addition reactions at 50 bar, respectively; (d) ratio of ignition delay time with third  $O_2$  addition reactions to ignition delay time without third  $O_2$  addition reactions at 50 bar.



## Section 4: Supporting information for quantum chemistry calculation

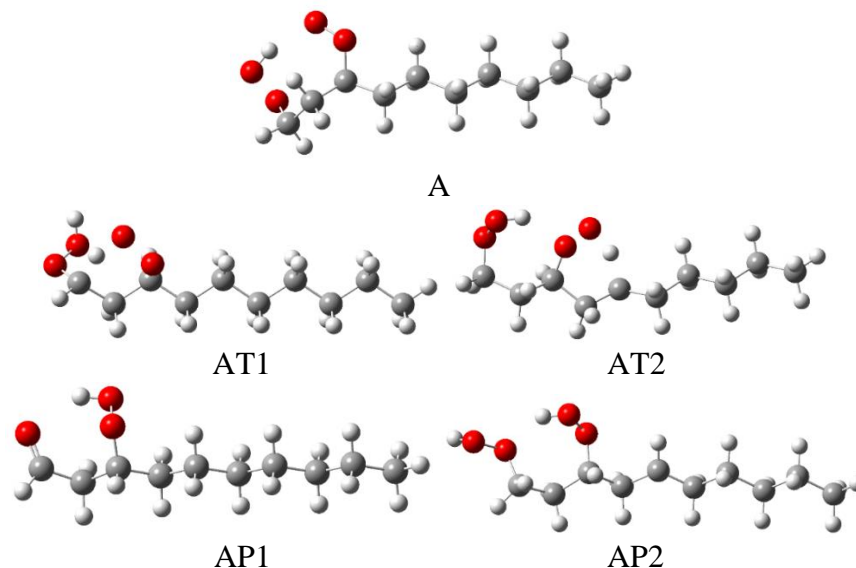

**Figure S18:** Lowest energy conformer of target species A ( $C_{10}H_{21}O_4$ , 1-OOH-3-OOj-decane), AT1 ( $C_{10}H_{21}O_4$ ), AT2 ( $C_{10}H_{21}O_4$ ), AP1 ( $C_{10}H_{20}O_3$ , 1-CHO-3-OOH-decane), and AP2 ( $C_{10}H_{21}O_4$ , 1-OOH-3-OOH-5j-decane). A $\rightarrow$ AT1 $\rightarrow$ AP1 is standard isomerization; A $\rightarrow$ AT2 $\rightarrow$ AP2 is extensive auto-oxidation.

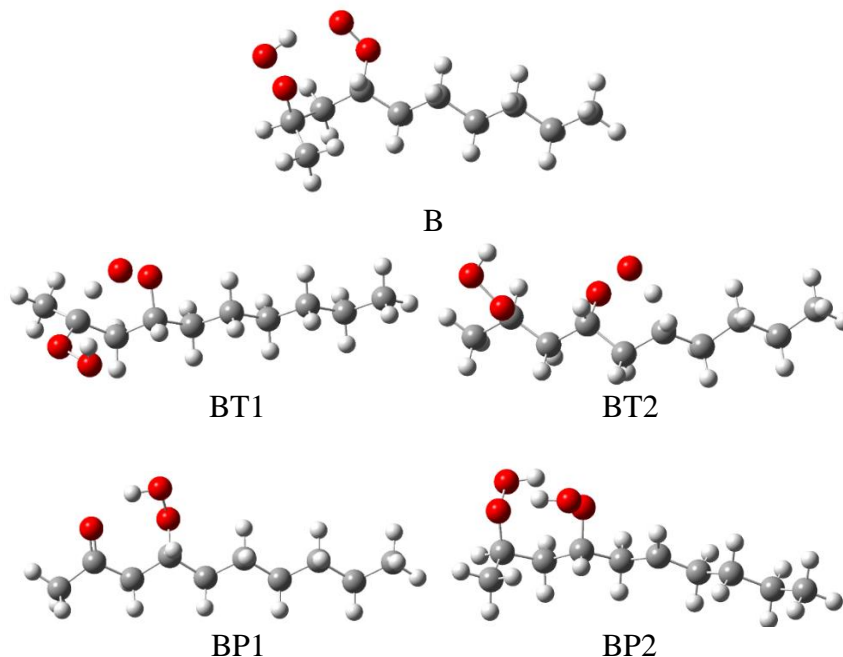

**Figure S19:** Lowest energy conformer of target species B ( $C_{10}H_{21}O_4$ , 2-OOH-4-OOj-decane), BT1 ( $C_{10}H_{21}O_4$ ), BT2 ( $C_{10}H_{21}O_4$ ), BP1 ( $C_{10}H_{20}O_3$ , 2-CO-4-OOH-decane), BP2 ( $C_{10}H_{21}O_4$ , 2-OOH-4-OOH-6j-decane). B $\rightarrow$ BT1 $\rightarrow$ BP1 is standard isomerization; B $\rightarrow$ BT2 $\rightarrow$ BP2 is extensive auto-oxidation.

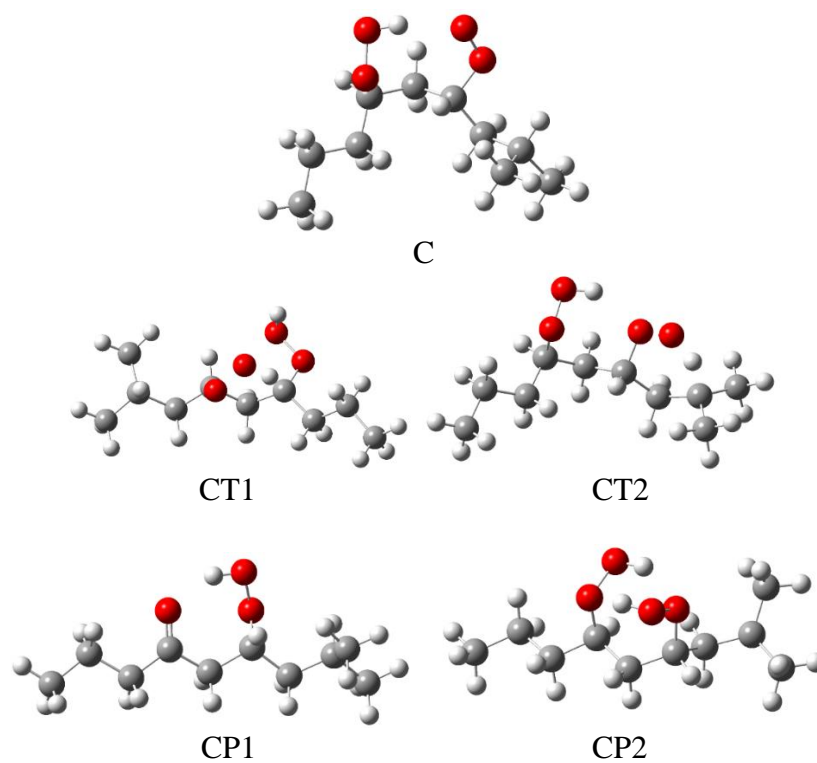

**Figure S20:** Lowest energy conformer of target species C ( $C_{10}H_{21}O_4$ , 4-OOj-6-OOH-isodecane), CT1 ( $C_{10}H_{21}O_4$ ), CT2 ( $C_{10}H_{21}O_4$ ), CP1 ( $C_{10}H_{20}O_3$ , 4-OOH-6-CO-isodecane), CP2 ( $C_{10}H_{21}O_4$ , 2j-4-OOH-6-OOH-isodecane).  $C \rightarrow CT1 \rightarrow CP1$  is standard isomerization;  $C \rightarrow CT2 \rightarrow CP2$  is extensive auto-oxidation.

**Table S5:** Cartesian coordinates for  $\alpha,\gamma$ -OOQOOH radical A, B, and C in Fig. 5, and derived transition states and products at the B3LYP/6-31+G(d,p) level of theory.

| Compound | Atom        | x           | y           | z           |
|----------|-------------|-------------|-------------|-------------|
| A        | C           | -3.93733300 | -1.51290800 | -0.09038000 |
|          | H           | -4.81841900 | -1.94380600 | 0.40081100  |
|          | H           | -3.36629400 | -2.32375900 | -0.56030300 |
|          | C           | -3.08718300 | -0.73577500 | 0.92235700  |
|          | H           | -3.72426700 | -0.00252000 | 1.42417000  |
|          | H           | -2.73745100 | -1.42990200 | 1.69599400  |
|          | C           | -1.89575600 | -0.01056100 | 0.27221000  |
|          | H           | -1.99208000 | -0.02161300 | -0.81833000 |
|          | C           | -0.52210000 | -0.50281900 | 0.71314100  |
|          | H           | -0.51122100 | -1.59130100 | 0.56502400  |
|          | H           | -0.42045700 | -0.33910900 | 1.79482400  |
|          | C           | 0.65605600  | 0.13233200  | -0.03745300 |
|          | H           | 0.63075600  | 1.22052500  | 0.09834500  |
|          | H           | 0.53555900  | -0.04772600 | -1.11524700 |
|          | C           | 2.01772700  | -0.40706600 | 0.42000900  |
|          | H           | 2.04352100  | -1.49818300 | 0.28316000  |
|          | H           | 2.13235300  | -0.23191100 | 1.49951300  |
|          | C           | 3.20231800  | 0.22474700  | -0.32289800 |
|          | H           | 3.17261400  | 1.31550100  | -0.18761100 |
|          | H           | 3.08876800  | 0.04853900  | -1.40240700 |
|          | C           | 4.56763400  | -0.30476900 | 0.13491600  |
|          | H           | 4.59933400  | -1.39575800 | -0.00181700 |
|          | H           | 4.68104200  | -0.13001800 | 1.21493100  |
|          | C           | 5.75234400  | 0.33036200  | -0.60524500 |
|          | H           | 5.71993300  | 1.42026600  | -0.46927100 |
|          | H           | 5.64021000  | 0.15476300  | -1.68418000 |
|          | C           | 7.11299800  | -0.20160700 | -0.14083200 |
|          | H           | 7.18997100  | -1.28410200 | -0.29824500 |
|          | H           | 7.93565400  | 0.27283400  | -0.68667700 |
|          | H           | 7.26896700  | -0.01107200 | 0.92768900  |
| O        | -4.33838100 | -0.72692600 | -1.20906000 |             |
| O        | -5.22982100 | 0.31505500  | -0.72728100 |             |
| H        | -4.60204500 | 1.06110000  | -0.63307600 |             |
| O        | -1.93199500 | 1.43017600  | 0.63235000  |             |
| O        | -2.95813800 | 2.06739900  | 0.09871000  |             |
| AP1      | C           | -4.81080400 | -0.64194400 | 0.23438800  |
|          | H           | -5.28696900 | -1.29969900 | 0.99044200  |
|          | C           | -3.48675000 | -1.08833200 | -0.33743000 |
|          | H           | -3.38373400 | -2.17496800 | -0.24644700 |
|          | H           | -3.45678100 | -0.81780700 | -1.39744200 |
|          | C           | -2.28749300 | -0.41516400 | 0.38475500  |
|          | H           | -2.22284600 | -0.78943900 | 1.41647300  |
|          | C           | -0.96583900 | -0.67560600 | -0.34489700 |
|          | H           | -1.02068200 | -0.19948400 | -1.33111100 |
|          | H           | -0.87635600 | -1.75729700 | -0.51768100 |
|          | C           | 0.26377000  | -0.16762200 | 0.41823000  |
|          | H           | 0.31072900  | -0.65877300 | 1.40144000  |
|          | H           | 0.14459100  | 0.90462200  | 0.61320400  |
|          | C           | 1.57882400  | -0.41367100 | -0.33317300 |
|          | H           | 1.53528800  | 0.08671400  | -1.31115900 |
|          | H           | 1.68478600  | -1.48818500 | -0.54429200 |
|          | C           | 2.81724600  | 0.07460600  | 0.43017300  |

|            |   |             |             |             |
|------------|---|-------------|-------------|-------------|
|            | H | 2.85889600  | -0.42439800 | 1.40942300  |
|            | H | 2.71177400  | 1.14865600  | 0.64009000  |
|            | C | 4.13523900  | -0.16847400 | -0.31677100 |
|            | H | 4.09564800  | 0.33225800  | -1.29524600 |
|            | H | 4.23996400  | -1.24278200 | -0.52898500 |
|            | C | 5.37447300  | 0.31682900  | 0.44731600  |
|            | H | 5.41408900  | -0.18278700 | 1.42529500  |
|            | H | 5.27076000  | 1.39026900  | 0.65799100  |
|            | C | 6.68694800  | 0.06931200  | -0.30527200 |
|            | H | 6.69145600  | 0.58442600  | -1.27328100 |
|            | H | 7.55014500  | 0.42790000  | 0.26598300  |
|            | H | 6.83703400  | -0.99953900 | -0.49921500 |
|            | O | -5.35202800 | 0.40366500  | -0.07854400 |
|            | O | -2.52702100 | 0.97740100  | 0.62075600  |
|            | O | -2.76889500 | 1.64125900  | -0.65235700 |
|            | H | -3.74792500 | 1.64211200  | -0.65824500 |
| <b>AP2</b> | C | -4.13586000 | -0.85448200 | 0.68272100  |
|            | H | -3.99750700 | -0.35160000 | 1.64703400  |
|            | H | -4.80289500 | -1.71385600 | 0.81872800  |
|            | C | -2.80404000 | -1.29757800 | 0.07737400  |
|            | H | -2.49261700 | -2.18174300 | 0.64907500  |
|            | H | -2.96921400 | -1.63114000 | -0.95498100 |
|            | C | -1.64328400 | -0.28722400 | 0.10816500  |
|            | H | -1.47744100 | 0.07142000  | 1.13215000  |
|            | C | -0.34758000 | -0.90786100 | -0.43955500 |
|            | H | -0.51139000 | -1.13538600 | -1.51047000 |
|            | H | -0.19670700 | -1.88426500 | 0.04421900  |
|            | C | 0.86351400  | -0.05184000 | -0.25565000 |
|            | H | 0.72872600  | 1.02734800  | -0.26989900 |
|            | C | 2.23818300  | -0.61614800 | -0.41375200 |
|            | H | 2.43041500  | -0.84970100 | -1.47988000 |
|            | H | 2.30248700  | -1.58892300 | 0.10080900  |
|            | C | 3.35789200  | 0.30721600  | 0.09236200  |
|            | H | 3.18592200  | 0.52916800  | 1.15447300  |
|            | H | 3.29495400  | 1.26879000  | -0.43606500 |
|            | C | 4.76248200  | -0.28196500 | -0.08665000 |
|            | H | 4.93132700  | -0.50456500 | -1.15065600 |
|            | H | 4.82132300  | -1.24675700 | 0.43872300  |
|            | C | 5.88377200  | 0.63488400  | 0.41998000  |
|            | H | 5.71287400  | 0.86130400  | 1.48160300  |
|            | H | 5.83038800  | 1.59665900  | -0.10865900 |
|            | C | 7.28338500  | 0.03386500  | 0.24597900  |
|            | H | 7.49794500  | -0.17182300 | -0.80958200 |
|            | H | 8.05958300  | 0.71211100  | 0.61684600  |
|            | H | 7.37881900  | -0.91188500 | 0.79280100  |
|            | O | -4.75757100 | 0.06040700  | -0.23643400 |
|            | O | -5.99056200 | 0.51656500  | 0.39733200  |
|            | H | -6.63699700 | 0.26318600  | -0.28238400 |
|            | O | -1.88299600 | 0.86039900  | -0.72019800 |
|            | O | -2.65331100 | 1.83901800  | 0.02612300  |
|            | H | -3.56526800 | 1.55734800  | -0.19431600 |
| <b>AT1</b> | C | -4.23815200 | 0.38097300  | -0.40633400 |
|            | H | -3.82230700 | -0.91160600 | -0.48505200 |
|            | H | -4.99655800 | 0.52786900  | -1.18019900 |
|            | C | -2.89948700 | 1.06666400  | -0.55807800 |
|            | H | -2.75878500 | 1.32978800  | -1.61151900 |

|            |   |             |             |             |
|------------|---|-------------|-------------|-------------|
|            | H | -2.87627900 | 1.99308400  | 0.03104800  |
|            | C | -1.72538600 | 0.15153900  | -0.11783400 |
|            | H | -1.80972300 | -0.06598200 | 0.95543700  |
|            | C | -0.35414800 | 0.73331500  | -0.45155800 |
|            | H | -0.31170600 | 1.74609200  | -0.02846200 |
|            | H | -0.27645800 | 0.84606000  | -1.54136100 |
|            | C | 0.82253800  | -0.09874100 | 0.07661200  |
|            | H | 0.76896900  | -1.10809600 | -0.34805700 |
|            | H | 0.72210300  | -0.21517500 | 1.16512200  |
|            | C | 2.18712700  | 0.52525500  | -0.24350000 |
|            | H | 2.23700000  | 1.53606900  | 0.18780700  |
|            | H | 2.28160600  | 0.65300800  | -1.33165600 |
|            | C | 3.37175000  | -0.30313700 | 0.27139200  |
|            | H | 3.32553200  | -1.31026000 | -0.16722400 |
|            | H | 3.27295400  | -0.43955800 | 1.35815600  |
|            | C | 4.73888900  | 0.32143500  | -0.03705900 |
|            | H | 4.78659800  | 1.32755900  | 0.40504300  |
|            | H | 4.83748200  | 0.46164700  | -1.12354000 |
|            | C | 5.92416300  | -0.50922500 | 0.47284600  |
|            | H | 5.87895600  | -1.51319100 | 0.02849100  |
|            | H | 5.82452000  | -0.65194100 | 1.55788300  |
|            | C | 7.28610400  | 0.12360000  | 0.16478400  |
|            | H | 7.37585800  | 1.11488200  | 0.62502500  |
|            | H | 8.10884500  | -0.49355500 | 0.54190900  |
|            | H | 7.43067600  | 0.24656700  | -0.91524400 |
|            | O | -4.73418000 | 0.58564700  | 0.87555700  |
|            | O | -6.03173900 | -0.06214100 | 0.97249900  |
|            | H | -5.82156000 | -0.79118900 | 1.58187500  |
|            | O | -1.84658100 | -1.08500200 | -0.83440900 |
|            | O | -2.99476400 | -1.76752000 | -0.35528500 |
| <b>AT2</b> | C | 4.58956900  | 0.61308400  | 0.00446700  |
|            | H | 5.38170000  | 0.80394100  | 0.74021400  |
|            | H | 4.83128800  | 1.15521000  | -0.91848700 |
|            | C | 3.23208500  | 1.06475200  | 0.56063700  |
|            | H | 3.10707900  | 0.71429800  | 1.59126400  |
|            | H | 3.23550500  | 2.16107300  | 0.60258200  |
|            | C | 2.02374300  | 0.60049100  | -0.25365900 |
|            | H | 2.25123500  | 0.55752600  | -1.32638200 |
|            | C | 0.75000200  | 1.44475700  | -0.00279700 |
|            | H | 0.92307300  | 2.44575500  | -0.42521100 |
|            | H | 0.62628500  | 1.56001900  | 1.08091800  |
|            | C | -0.49363000 | 0.82044100  | -0.60689100 |
|            | H | -0.05102300 | -0.46625500 | -0.69356500 |
|            | H | -0.62620600 | 1.03103400  | -1.67389700 |
|            | C | -1.77366600 | 0.84230200  | 0.19730900  |
|            | H | -2.06130600 | 1.89537900  | 0.36828200  |
|            | H | -1.58126800 | 0.42426300  | 1.19548100  |
|            | C | -2.94593700 | 0.10349700  | -0.46316000 |
|            | H | -2.66305100 | -0.94490000 | -0.62958700 |
|            | H | -3.13070200 | 0.53455400  | -1.45752600 |
|            | C | -4.23791600 | 0.15710800  | 0.36230400  |
|            | H | -4.51526600 | 1.20705700  | 0.53767600  |
|            | H | -4.05200300 | -0.27903900 | 1.35455300  |
|            | C | -5.41675400 | -0.57223200 | -0.29568000 |
|            | H | -5.13847900 | -1.61991800 | -0.47434000 |
|            | H | -5.60594100 | -0.13382400 | -1.28538600 |

|            |   |             |             |             |
|------------|---|-------------|-------------|-------------|
|            | C | -6.70161200 | -0.52060800 | 0.53886000  |
|            | H | -7.02491000 | 0.51386800  | 0.70560700  |
|            | H | -7.52217800 | -1.04926600 | 0.04202000  |
|            | H | -6.55449400 | -0.98372600 | 1.52175600  |
|            | O | 4.63569400  | -0.74311700 | -0.42253600 |
|            | O | 4.41295700  | -1.58960300 | 0.73836500  |
|            | H | 3.45889400  | -1.77399500 | 0.63121900  |
|            | O | 1.73012900  | -0.74279000 | 0.18384400  |
|            | O | 0.79077800  | -1.30881500 | -0.71661400 |
| <b>B</b>   | C | -2.67847900 | 2.44855800  | -0.29040000 |
|            | H | -1.77891100 | 2.28315600  | -0.89224600 |
|            | H | -2.40875300 | 3.06362400  | 0.57392300  |
|            | H | -3.39609800 | 3.00283200  | -0.90090300 |
|            | C | -3.29245500 | 1.13143700  | 0.18022800  |
|            | H | -4.20726200 | 1.33378900  | 0.75285200  |
|            | C | -2.35997000 | 0.26696500  | 1.05170100  |
|            | H | -2.94034700 | -0.57240600 | 1.44354700  |
|            | H | -2.03938000 | 0.85673600  | 1.91849800  |
|            | C | -1.13712700 | -0.28315500 | 0.29670100  |
|            | H | -1.25073300 | -0.13008900 | -0.78125800 |
|            | C | 0.21306500  | 0.22300600  | 0.79331300  |
|            | H | 0.33989800  | -0.08746000 | 1.83963500  |
|            | H | 0.15876600  | 1.31950500  | 0.80402500  |
|            | C | 1.41553100  | -0.22723800 | -0.04709600 |
|            | H | 1.26988600  | 0.09729200  | -1.08737900 |
|            | H | 1.45647100  | -1.32316000 | -0.06874200 |
|            | C | 2.74870800  | 0.32365600  | 0.47606900  |
|            | H | 2.89032300  | 0.00027200  | 1.51747900  |
|            | H | 2.70465700  | 1.42249000  | 0.50094300  |
|            | C | 3.95960400  | -0.11504700 | -0.35777700 |
|            | H | 3.81913500  | 0.20762300  | -1.39973100 |
|            | H | 4.00359000  | -1.21346500 | -0.38260400 |
|            | C | 5.29518500  | 0.43185800  | 0.16361400  |
|            | H | 5.43619200  | 0.10857900  | 1.20435700  |
|            | H | 5.25093000  | 1.52962900  | 0.18877000  |
|            | C | 6.49954200  | -0.01074200 | -0.67521700 |
|            | H | 6.40382600  | 0.32566000  | -1.71442700 |
|            | H | 7.43506800  | 0.39792100  | -0.27830300 |
|            | H | 6.59291400  | -1.10311500 | -0.68873200 |
|            | O | -3.66145900 | 0.45658900  | -1.03029400 |
|            | O | -4.44617900 | -0.71550400 | -0.68470400 |
|            | H | -3.75655800 | -1.41084600 | -0.70889100 |
|            | O | -1.07783900 | -1.75983900 | 0.45606300  |
|            | O | -2.06017800 | -2.38679000 | -0.16452000 |
| <b>BP1</b> | C | 5.04999500  | -1.35917300 | -0.15930300 |
|            | H | 4.98428000  | -1.97346500 | -1.06626900 |
|            | H | 4.99099000  | -2.04203500 | 0.69501300  |
|            | H | 6.00495500  | -0.83168300 | -0.15611700 |
|            | C | 3.90784100  | -0.36435400 | -0.14691900 |
|            | C | 2.52888400  | -0.92863800 | 0.15704100  |
|            | H | 2.53973100  | -1.22519000 | 1.21679900  |
|            | H | 2.41682100  | -1.86610300 | -0.40520400 |
|            | C | 1.31586500  | -0.01680900 | -0.09329500 |
|            | H | 1.31308300  | 0.34250300  | -1.12856800 |
|            | C | -0.00105900 | -0.74223800 | 0.21206300  |
|            | H | -0.02910400 | -0.97084600 | 1.28677100  |

|            |   |             |             |             |
|------------|---|-------------|-------------|-------------|
|            | H | 0.00195600  | -1.70787700 | -0.31248600 |
|            | C | -1.24715700 | 0.05973700  | -0.18162800 |
|            | H | -1.22565500 | 0.25191900  | -1.26398700 |
|            | H | -1.20710300 | 1.03959100  | 0.30761200  |
|            | C | -2.55766700 | -0.65031100 | 0.18248200  |
|            | H | -2.57840200 | -0.83768300 | 1.26602300  |
|            | H | -2.58597300 | -1.63946000 | -0.29865400 |
|            | C | -3.81112000 | 0.13998700  | -0.21589300 |
|            | H | -3.79345400 | 0.32704700  | -1.29960300 |
|            | H | -3.78248300 | 1.12897200  | 0.26362500  |
|            | C | -5.12471800 | -0.56229100 | 0.15294800  |
|            | H | -5.14236300 | -0.74895100 | 1.23578300  |
|            | H | -5.15364700 | -1.55055900 | -0.32699100 |
|            | C | -6.37148200 | 0.23542700  | -0.24671600 |
|            | H | -6.40175900 | 0.40699600  | -1.32935800 |
|            | H | -7.29074100 | -0.29100900 | 0.03246300  |
|            | H | -6.38735500 | 1.21611900  | 0.24340700  |
|            | O | 4.11518700  | 0.82093600  | -0.37238500 |
|            | O | 1.37365500  | 1.13786000  | 0.76356000  |
|            | O | 1.81425300  | 2.29451400  | 0.00715600  |
|            | H | 2.76517300  | 2.07720500  | -0.11159100 |
| <b>BP2</b> | C | 3.63978500  | 1.41866500  | 1.47268500  |
|            | H | 2.90373400  | 0.95634400  | 2.13702000  |
|            | H | 3.47232700  | 2.50021100  | 1.47299100  |
|            | H | 4.63792500  | 1.22624100  | 1.87544200  |
|            | C | 3.53324800  | 0.88655400  | 0.04466500  |
|            | H | 4.29071700  | 1.37119200  | -0.58455500 |
|            | C | 2.16084300  | 1.08799300  | -0.62088100 |
|            | H | 2.25113400  | 0.86004700  | -1.68910100 |
|            | H | 1.92739500  | 2.15858600  | -0.55724400 |
|            | C | 0.97012400  | 0.29708600  | -0.05536900 |
|            | H | 0.81604000  | 0.49825900  | 1.00875400  |
|            | C | -0.32609200 | 0.58911300  | -0.82489200 |
|            | H | -0.18634700 | 0.24234600  | -1.86700500 |
|            | H | -0.44812300 | 1.68018600  | -0.90012800 |
|            | C | -1.54503700 | -0.02642100 | -0.21785400 |
|            | H | -1.42196000 | -0.94883800 | 0.34560800  |
|            | C | -2.91440100 | 0.37068500  | -0.66532500 |
|            | H | -3.10195900 | -0.01333400 | -1.68771600 |
|            | H | -2.97162200 | 1.46697700  | -0.76380400 |
|            | C | -4.04214900 | -0.12267900 | 0.25509700  |
|            | H | -3.88333000 | 0.27983800  | 1.26500400  |
|            | H | -3.97684600 | -1.21601200 | 0.34725000  |
|            | C | -5.44373400 | 0.26269700  | -0.23421400 |
|            | H | -5.59893200 | -0.14337900 | -1.24358800 |
|            | H | -5.50486700 | 1.35562300  | -0.33298800 |
|            | C | -6.56346500 | -0.22819000 | 0.69057900  |
|            | H | -6.45671000 | 0.19010400  | 1.69848800  |
|            | H | -7.55003600 | 0.06159300  | 0.31292200  |
|            | H | -6.55012200 | -1.32066900 | 0.78318700  |
|            | O | 3.90633100  | -0.50795600 | 0.15794900  |
|            | O | 3.90580200  | -1.11698800 | -1.15987800 |
|            | H | 2.98262600  | -1.44377900 | -1.20232800 |
|            | O | 1.19903300  | -1.13389300 | -0.17534500 |
|            | O | 1.61101700  | -1.67569100 | 1.10762500  |
|            | H | 2.57676500  | -1.49833500 | 1.07204200  |

|            |             |             |             |             |
|------------|-------------|-------------|-------------|-------------|
| <b>BT1</b> | C           | -4.41183800 | 1.49578200  | -0.29947000 |
|            | H           | -4.69636600 | 1.65775300  | -1.34794600 |
|            | H           | -3.89868300 | 2.39197300  | 0.05997500  |
|            | H           | -5.32170200 | 1.35303100  | 0.28936900  |
|            | C           | -3.48763100 | 0.30452700  | -0.17033700 |
|            | H           | -3.01102800 | 0.26657800  | 1.08390200  |
|            | C           | -2.15962800 | 0.34160300  | -0.92148800 |
|            | H           | -1.99551800 | 1.36381500  | -1.27971900 |
|            | H           | -2.21695300 | -0.32466300 | -1.79003500 |
|            | C           | -0.94093700 | -0.06027600 | -0.05318400 |
|            | H           | -0.97160500 | -1.13615400 | 0.15383700  |
|            | C           | 0.39288500  | 0.33825000  | -0.67979900 |
|            | H           | 0.42203300  | 1.43236300  | -0.77438900 |
|            | H           | 0.41213200  | -0.06391000 | -1.70187300 |
|            | C           | 1.62335600  | -0.15375000 | 0.09437400  |
|            | H           | 1.58326700  | -1.24901300 | 0.17940600  |
|            | H           | 1.58478100  | 0.23733800  | 1.11794500  |
|            | C           | 2.94613200  | 0.25740300  | -0.56541400 |
|            | H           | 2.97662500  | 1.35239600  | -0.66314700 |
|            | H           | 2.98322800  | -0.14121100 | -1.59014200 |
|            | C           | 4.18642900  | -0.21357300 | 0.20531100  |
|            | H           | 4.15766100  | -1.30839000 | 0.30659300  |
|            | H           | 4.15013400  | 0.18751600  | 1.22855500  |
|            | C           | 5.51121200  | 0.19719600  | -0.45117300 |
|            | H           | 5.53830900  | 1.29078200  | -0.55588900 |
|            | H           | 5.54941300  | -0.20748800 | -1.47219600 |
|            | C           | 6.74512100  | -0.27067000 | 0.32915500  |
|            | H           | 6.76450800  | -1.36313600 | 0.42167500  |
|            | H           | 7.67260200  | 0.03762100  | -0.16555800 |
|            | H           | 6.75392600  | 0.14680100  | 1.34304400  |
| O          | -4.27882000 | -0.84112100 | -0.34757200 |             |
| O          | -3.45182000 | -2.03467300 | -0.31724600 |             |
| H          | -3.55839100 | -2.31188700 | 0.61009700  |             |
| O          | -1.03882400 | 0.63831700  | 1.20043900  |             |
| O          | -2.14415800 | 0.10859500  | 1.91670900  |             |
| <b>BT2</b> | C           | 4.64441600  | -1.14579700 | 0.82598000  |
|            | H           | 4.84308600  | -1.91365600 | 0.07030000  |
|            | H           | 4.39431400  | -1.64043400 | 1.77100400  |
|            | H           | 5.55443100  | -0.55992300 | 0.97483900  |
|            | C           | 3.49916600  | -0.24012800 | 0.38555800  |
|            | H           | 3.27508000  | 0.50116300  | 1.16245700  |
|            | C           | 2.22692100  | -1.01973600 | 0.03326600  |
|            | H           | 2.00238300  | -1.70384100 | 0.86036800  |
|            | H           | 2.42258700  | -1.63777400 | -0.85160700 |
|            | C           | 1.00284100  | -0.14816000 | -0.23739000 |
|            | H           | 1.23791000  | 0.64182200  | -0.96027300 |
|            | C           | -0.22942000 | -0.95865200 | -0.71205900 |
|            | H           | -0.36318700 | -1.80710300 | -0.02990900 |
|            | H           | -0.00238500 | -1.36497600 | -1.70891900 |
|            | C           | -1.49215400 | -0.11994200 | -0.75278900 |
|            | H           | -1.59675500 | 0.48844400  | -1.65788700 |
|            | H           | -1.10018300 | 0.86081400  | 0.12714100  |
|            | C           | -2.78254900 | -0.73594500 | -0.26229600 |
|            | H           | -2.62620200 | -1.15256600 | 0.74280800  |
|            | H           | -3.02628400 | -1.60056600 | -0.90599400 |
|            | C           | -3.97593900 | 0.22924200  | -0.24756700 |



|            |   |             |             |             |
|------------|---|-------------|-------------|-------------|
|            | H | -4.12514800 | 0.63673500  | -1.25788400 |
|            | H | -3.73815500 | 1.08629600  | 0.39761500  |
|            | C | -5.27897100 | -0.42217300 | 0.23355100  |
|            | H | -5.12765300 | -0.82808400 | 1.24328200  |
|            | H | -5.51344700 | -1.28231600 | -0.40924800 |
|            | C | -6.46850100 | 0.54446400  | 0.24555300  |
|            | H | -6.66610000 | 0.94218900  | -0.75694600 |
|            | H | -7.38160500 | 0.04918500  | 0.59276500  |
|            | H | -6.27946300 | 1.39694200  | 0.90847200  |
|            | O | 3.82813200  | 0.46731900  | -0.82800000 |
|            | O | 4.88730500  | 1.41785000  | -0.52154100 |
|            | H | 4.40034700  | 2.25519100  | -0.59898500 |
|            | O | 0.65642700  | 0.47357000  | 1.01020200  |
|            | O | -0.30416900 | 1.48294000  | 0.74130800  |
| <b>C</b>   | C | 3.94254500  | -1.83682500 | -0.49939500 |
|            | H | 4.34167400  | -1.39873900 | -1.42115800 |
|            | H | 3.44370800  | -2.77810300 | -0.76401100 |
|            | H | 4.79064100  | -2.08219100 | 0.14878900  |
|            | C | 2.96998400  | -0.87733300 | 0.20432700  |
|            | H | 3.51714700  | 0.04638800  | 0.43462800  |
|            | C | 1.81247300  | -0.51573400 | -0.74994600 |
|            | H | 1.20609200  | -1.41188100 | -0.94115500 |
|            | H | 2.21957600  | -0.20861100 | -1.72289200 |
|            | C | 0.85703800  | 0.57437800  | -0.27469400 |
|            | H | 0.49147500  | 0.39191800  | 0.73903200  |
|            | C | -0.32211500 | 0.85835200  | -1.22248600 |
|            | H | -0.20876600 | 0.29308600  | -2.15495900 |
|            | H | -0.30286800 | 1.91657600  | -1.49643300 |
|            | C | -1.70411300 | 0.54437400  | -0.61382500 |
|            | H | -2.47444800 | 0.95083000  | -1.28392000 |
|            | C | -1.96800500 | -0.94770200 | -0.37840100 |
|            | H | -1.25951400 | -1.33102800 | 0.36865600  |
|            | H | -1.74641300 | -1.47282000 | -1.31762900 |
|            | C | -3.40303100 | -1.26955900 | 0.06188700  |
|            | H | -4.10309200 | -0.87517600 | -0.68713800 |
|            | H | -3.62071500 | -0.74066100 | 0.99564200  |
|            | C | -3.64073900 | -2.77251800 | 0.24503500  |
|            | H | -2.97670100 | -3.18902100 | 1.01189600  |
|            | H | -4.67123800 | -2.97487300 | 0.55521100  |
|            | H | -3.45968100 | -3.32376700 | -0.68582400 |
|            | C | 2.47406000  | -1.48219500 | 1.52752800  |
|            | H | 1.83274500  | -0.79434300 | 2.08824300  |
|            | H | 1.90516900  | -2.40390900 | 1.34889300  |
|            | H | 3.31930900  | -1.73615500 | 2.17606000  |
|            | O | 1.69796100  | 1.79487600  | -0.14945900 |
|            | O | 1.09174300  | 2.77657300  | 0.49260600  |
|            | O | -1.85963000 | 1.15980400  | 0.67211900  |
|            | O | -1.85906500 | 2.60166200  | 0.49916400  |
|            | H | -0.92076700 | 2.80773500  | 0.69245300  |
| <b>CP2</b> | C | 3.72607400  | 0.24817100  | -1.53207900 |
|            | H | 3.06186900  | 0.33428600  | -2.39988900 |
|            | H | 4.73769200  | 0.03127400  | -1.89747200 |
|            | H | 3.76545400  | 1.24616300  | -1.06132800 |
|            | C | 3.25630800  | -0.79843300 | -0.57045400 |
|            | C | 1.78714300  | -1.05392200 | -0.38757200 |
|            | H | 1.61872100  | -2.12229700 | -0.18389200 |

|            |   |             |             |             |
|------------|---|-------------|-------------|-------------|
|            | H | 1.24173800  | -0.81549000 | -1.30876900 |
|            | C | 1.13087700  | -0.30091700 | 0.79697300  |
|            | H | 1.70021900  | -0.50484400 | 1.71275500  |
|            | C | -0.33947400 | -0.67567500 | 1.05527600  |
|            | H | -0.63845500 | -0.27208100 | 2.02962800  |
|            | H | -0.38098700 | -1.76787200 | 1.15547800  |
|            | C | -1.38467700 | -0.24342800 | 0.01373600  |
|            | H | -1.14371500 | -0.62644600 | -0.98299100 |
|            | C | -2.80032900 | -0.67886600 | 0.40853800  |
|            | H | -3.08358700 | -0.14939400 | 1.32906500  |
|            | H | -2.77071000 | -1.74698400 | 0.66391400  |
|            | C | -3.85274600 | -0.43319600 | -0.67964000 |
|            | H | -3.57907200 | -1.00053000 | -1.57981100 |
|            | H | -3.83237800 | 0.62491100  | -0.96246400 |
|            | C | -5.26590000 | -0.82714800 | -0.23565100 |
|            | H | -5.58113800 | -0.24853500 | 0.64070300  |
|            | H | -5.99572900 | -0.64659500 | -1.03183700 |
|            | H | -5.32102300 | -1.88957600 | 0.03123700  |
|            | C | 4.21509000  | -1.31446000 | 0.45881400  |
|            | H | 3.86287500  | -2.24592000 | 0.91879500  |
|            | H | 5.20437400  | -1.50422100 | 0.02395400  |
|            | H | 4.37392300  | -0.59199100 | 1.27976100  |
|            | O | 1.30934900  | 1.09865800  | 0.48595200  |
|            | O | -1.41758500 | 1.20765100  | -0.10184000 |
|            | O | -0.70957300 | 1.62393800  | -1.29953100 |
|            | H | 0.21135900  | 1.64960100  | -0.95856600 |
|            | O | 0.79840700  | 1.90576800  | 1.58092800  |
|            | H | -0.13041900 | 2.02567500  | 1.29001100  |
| <b>CP1</b> | C | 4.59407300  | -1.15635100 | -0.55948700 |
|            | H | 4.50147400  | -1.25564100 | -1.64705700 |
|            | H | 4.56656100  | -2.16544400 | -0.12732300 |
|            | H | 5.58135900  | -0.73224800 | -0.34569100 |
|            | C | 3.47724400  | -0.27424700 | 0.02027500  |
|            | H | 3.54160500  | 0.71359600  | -0.45256300 |
|            | C | 2.09909800  | -0.86301800 | -0.33962300 |
|            | H | 1.95876300  | -1.81597200 | 0.19147000  |
|            | H | 2.07774300  | -1.09885700 | -1.41259700 |
|            | C | 3.66153400  | -0.09315200 | 1.53543300  |
|            | H | 2.92608800  | 0.59594500  | 1.96234500  |
|            | H | 3.57426400  | -1.05396800 | 2.06045500  |
|            | H | 4.65359500  | 0.31525800  | 1.75749200  |
|            | C | 0.90101300  | 0.04759900  | -0.03528900 |
|            | H | 0.92969800  | 0.38792000  | 1.00450100  |
|            | C | -0.42738700 | -0.67500200 | -0.32134600 |
|            | H | -0.44924400 | -1.63888600 | 0.20467800  |
|            | H | -0.46964700 | -0.92484100 | -1.39226000 |
|            | C | -1.71722100 | 0.06695000  | -0.00225400 |
|            | C | -2.97655700 | -0.78262900 | 0.04854800  |
|            | H | -2.88372600 | -1.43383700 | 0.93229200  |
|            | H | -2.96278400 | -1.46952200 | -0.81015200 |
|            | C | -4.28650300 | 0.00680400  | 0.10172900  |
|            | H | -4.34853600 | 0.65736600  | -0.77853400 |
|            | H | -4.26633600 | 0.67617700  | 0.96817700  |
|            | C | -5.51604300 | -0.90581300 | 0.16613000  |
|            | H | -5.49471100 | -1.54429900 | 1.05749400  |
|            | H | -6.43908900 | -0.31826900 | 0.20227400  |

|            |   |             |             |             |
|------------|---|-------------|-------------|-------------|
|            | H | -5.57510900 | -1.56210500 | -0.71036600 |
|            | O | 1.03415800  | 1.20976100  | -0.87315500 |
|            | O | 0.72488300  | 2.40611700  | -0.11296100 |
|            | H | -0.25057600 | 2.31583000  | -0.03020400 |
|            | O | -1.76240400 | 1.27474100  | 0.19622500  |
| <b>CT2</b> | C | -4.45880300 | -0.31178100 | 0.56829500  |
|            | H | -4.39513400 | 0.64336300  | 1.09919600  |
|            | H | -4.79723000 | -1.06997900 | 1.29266300  |
|            | H | -5.23334900 | -0.23001300 | -0.20122900 |
|            | C | -3.12210700 | -0.70877500 | -0.02718000 |
|            | H | -2.76596300 | 0.28935300  | -0.84511500 |
|            | C | -1.92516200 | -0.63475800 | 0.91742100  |
|            | H | -1.62274600 | -1.64646000 | 1.22719500  |
|            | H | -2.18932000 | -0.07623300 | 1.82272900  |
|            | C | -0.69360100 | 0.05386200  | 0.27904800  |
|            | H | -0.31931100 | -0.53354200 | -0.56714600 |
|            | C | 0.41260500  | 0.37240500  | 1.28810500  |
|            | H | 0.45431700  | -0.42664500 | 2.03787100  |
|            | H | 0.12200500  | 1.28261100  | 1.82468000  |
|            | C | 1.82529400  | 0.54504000  | 0.68911900  |
|            | H | 2.44932100  | 1.07641800  | 1.42195500  |
|            | C | 2.50237900  | -0.78190100 | 0.32024100  |
|            | H | 1.91323300  | -1.28911800 | -0.45587000 |
|            | H | 2.46890700  | -1.42523400 | 1.21024300  |
|            | C | 3.95660100  | -0.63742800 | -0.14993300 |
|            | H | 4.53183800  | -0.11129600 | 0.62407700  |
|            | H | 3.98655900  | -0.00177300 | -1.04084100 |
|            | C | 4.61586200  | -1.98812900 | -0.44979900 |
|            | H | 4.07946600  | -2.52473400 | -1.24160500 |
|            | H | 5.65123400  | -1.85807900 | -0.78207600 |
|            | H | 4.63033600  | -2.63362900 | 0.43709400  |
|            | C | -3.15517900 | -1.92017800 | -0.94197300 |
|            | H | -2.18829700 | -2.09222200 | -1.42579900 |
|            | H | -3.40505900 | -2.82479400 | -0.36620500 |
|            | H | -3.91172000 | -1.81169500 | -1.72598200 |
|            | O | -1.14629000 | 1.32225900  | -0.24325900 |
|            | O | -1.98701900 | 1.06799900  | -1.35611900 |
|            | O | 1.81494100  | 1.30282900  | -0.52562000 |
|            | O | 1.36505400  | 2.65201100  | -0.22961300 |
|            | H | 0.42008800  | 2.57278500  | -0.46901200 |
| <b>CT1</b> | C | -4.67749200 | -1.34074800 | -0.46999000 |
|            | H | -4.35959400 | -2.38650500 | -0.54980600 |
|            | H | -4.92005800 | -0.98598100 | -1.48023900 |
|            | H | -5.59802300 | -1.31332100 | 0.12318900  |
|            | C | -3.58020700 | -0.47272500 | 0.16648300  |
|            | H | -3.35550300 | -0.88225000 | 1.15972900  |
|            | C | -2.29173300 | -0.56184200 | -0.67772900 |
|            | H | -2.46514500 | -0.08792600 | -1.65455200 |
|            | H | -2.06286400 | -1.61685600 | -0.87975300 |
|            | C | -1.04818200 | 0.08028700  | -0.06662100 |
|            | H | -1.23148500 | 1.11709500  | 0.23159900  |
|            | C | 0.17578800  | 0.02758700  | -1.01619200 |
|            | H | 0.03263100  | 0.75529600  | -1.82312500 |
|            | H | 0.21875500  | -0.97421800 | -1.45739000 |
|            | C | 1.50479700  | 0.30287600  | -0.31745100 |
|            | H | 1.10436300  | 0.13724500  | 0.95433100  |

---

|   |             |             |             |
|---|-------------|-------------|-------------|
| C | 2.65604200  | -0.65382400 | -0.58202600 |
| H | 2.93609600  | -0.57876400 | -1.64545100 |
| H | 2.26387500  | -1.66731700 | -0.43373500 |
| C | 3.89876800  | -0.44781300 | 0.29794800  |
| H | 3.60116900  | -0.50330400 | 1.35297400  |
| H | 4.29844300  | 0.55938200  | 0.13785900  |
| C | 4.98761300  | -1.48835500 | 0.01422100  |
| H | 5.32395200  | -1.43903900 | -1.02823900 |
| H | 5.86230900  | -1.32701000 | 0.65267000  |
| H | 4.62413600  | -2.50618900 | 0.19903400  |
| C | -4.06725700 | 0.97399500  | 0.34425900  |
| H | -3.32980300 | 1.59963900  | 0.85725300  |
| H | -4.28548300 | 1.43699000  | -0.62711600 |
| H | -4.98725700 | 1.00211200  | 0.93844700  |
| O | -0.72912700 | -0.67370800 | 1.11623700  |
| O | 0.27383300  | 0.03175900  | 1.83245300  |
| O | 2.00705200  | 1.60778400  | -0.43062300 |
| O | 0.94067900  | 2.57796100  | -0.25264300 |
| H | 1.04116700  | 2.79391300  | 0.69153300  |

---

**Table S6:** Frequencies for  $\alpha,\gamma$ -OOQOOH radical A, B, and C in Fig. 5 and derived transition states and products at the B3LYP/6-31+G(d,p) level of theory ( $\text{cm}^{-1}$ ).

|            |           |           |           |
|------------|-----------|-----------|-----------|
| <b>A</b>   | 24.3616   | 40.8751   | 46.9018   |
|            | 54.0297   | 87.7160   | 97.9585   |
|            | 108.1411  | 123.0471  | 146.5021  |
|            | 152.2271  | 157.2658  | 172.0156  |
|            | 212.3146  | 244.6191  | 247.2637  |
|            | 273.2476  | 312.6941  | 385.4827  |
|            | 402.9628  | 429.1319  | 455.2391  |
|            | 500.9061  | 533.2229  | 556.7340  |
|            | 582.6810  | 729.7967  | 735.1282  |
|            | 755.4198  | 796.2095  | 805.2641  |
|            | 865.0563  | 882.6747  | 897.8623  |
|            | 918.3163  | 934.3868  | 987.8624  |
|            | 1003.9643 | 1027.0632 | 1029.3911 |
|            | 1045.1870 | 1065.5074 | 1067.4423 |
|            | 1068.9583 | 1082.6330 | 1121.4771 |
|            | 1140.1302 | 1166.9318 | 1208.0171 |
|            | 1216.2674 | 1231.0151 | 1252.7273 |
|            | 1265.2312 | 1275.1193 | 1297.5275 |
|            | 1312.4731 | 1327.0947 | 1328.0601 |
|            | 1337.7863 | 1340.3948 | 1347.2000 |
|            | 1372.9185 | 1383.3458 | 1390.4278 |
|            | 1401.2608 | 1408.0495 | 1413.7417 |
|            | 1418.8951 | 1434.9633 | 1475.4806 |
|            | 1478.9082 | 1484.9210 | 1489.9815 |
|            | 1491.2134 | 1495.5884 | 1502.5393 |
|            | 1504.6264 | 1511.0441 | 1517.1688 |
|            | 3003.3646 | 3005.6269 | 3011.6645 |
|            | 3019.0783 | 3021.2128 | 3026.4336 |
|            | 3028.0495 | 3030.0361 | 3034.6912 |
|            | 3036.9014 | 3049.0032 | 3056.9851 |
| 3060.9710  | 3064.7291 | 3080.4647 |           |
| 3086.1493  | 3088.7573 | 3096.3250 |           |
| 3101.6214  | 3117.9702 | 3620.8393 |           |
| <b>AP1</b> | 25.9264   | 39.7360   | 45.1643   |
|            | 68.5906   | 86.1367   | 98.2515   |
|            | 107.5842  | 133.2231  | 149.4507  |
|            | 156.0572  | 176.7600  | 213.0062  |
|            | 217.5718  | 246.5818  | 278.1957  |
|            | 292.0579  | 377.0978  | 413.0934  |
|            | 483.7786  | 522.8282  | 538.5905  |
|            | 561.6045  | 595.0132  | 732.4045  |
|            | 740.0461  | 770.9398  | 806.7589  |
|            | 833.4532  | 885.2922  | 897.9498  |
|            | 910.4251  | 951.7183  | 972.0437  |
|            | 987.0751  | 994.9797  | 1025.4766 |
|            | 1030.6673 | 1039.0751 | 1062.9166 |
|            | 1066.9149 | 1079.2190 | 1103.4770 |
|            | 1141.7026 | 1163.2753 | 1213.1212 |
|            | 1228.1610 | 1243.4738 | 1269.4664 |
|            | 1274.9510 | 1305.3397 | 1311.3293 |
|            | 1324.5902 | 1332.8854 | 1335.2361 |
|            | 1338.2386 | 1357.9437 | 1376.5542 |
|            | 1392.3585 | 1405.6561 | 1406.7090 |

|            |            |           |           |
|------------|------------|-----------|-----------|
|            | 1419.1263  | 1420.2637 | 1425.9292 |
|            | 1476.5182  | 1485.8186 | 1490.0434 |
|            | 1491.3734  | 1495.9100 | 1503.1156 |
|            | 1504.6609  | 1511.3966 | 1517.1651 |
|            | 1786.0110  | 2938.8653 | 3001.9779 |
|            | 3004.2525  | 3008.8518 | 3013.4367 |
|            | 3019.7886  | 3025.7751 | 3026.4291 |
|            | 3029.5765  | 3033.7283 | 3035.7201 |
|            | 3048.5406  | 3062.9178 | 3063.2973 |
|            | 3074.2854  | 3090.1199 | 3095.6552 |
|            | 3100.4193  | 3120.9082 | 3633.0938 |
| <b>AP2</b> | 17.4684    | 26.4537   | 31.6674   |
|            | 54.2955    | 75.4217   | 99.4225   |
|            | 106.2837   | 110.8510  | 129.6049  |
|            | 147.4923   | 154.6378  | 184.2501  |
|            | 207.2999   | 235.5102  | 245.1677  |
|            | 246.8422   | 271.4703  | 279.0911  |
|            | 339.1590   | 359.1425  | 416.2276  |
|            | 443.5702   | 445.5880  | 484.2182  |
|            | 521.2734   | 585.4489  | 613.2415  |
|            | 731.0884   | 751.6060  | 793.7871  |
|            | 817.1134   | 846.0440  | 897.2066  |
|            | 902.7384   | 941.5151  | 951.8470  |
|            | 964.6008   | 985.5822  | 994.8130  |
|            | 1026.5210  | 1038.3396 | 1056.5992 |
|            | 1066.5147  | 1067.6054 | 1083.2321 |
|            | 1108.1232  | 1113.8025 | 1139.6173 |
|            | 1151.9025  | 1204.9548 | 1223.5044 |
|            | 1232.3640  | 1254.1264 | 1273.3633 |
|            | 1284.2321  | 1290.0211 | 1314.2593 |
|            | 1326.2267  | 1331.0759 | 1350.6320 |
|            | 1357.9919  | 1366.3581 | 1385.6220 |
|            | 1400.1168  | 1405.8337 | 1408.4880 |
|            | 1417.5477  | 1428.8390 | 1439.6900 |
|            | 1453.8670  | 1464.5208 | 1473.5468 |
|            | 1491.2158  | 1494.5941 | 1504.4354 |
|            | 1505.0742  | 1514.9168 | 1521.6945 |
|            | 2913.8590  | 2932.1120 | 2989.5567 |
|            | 3003.3258  | 3015.6103 | 3019.8919 |
|            | 3022.7307  | 3027.9344 | 3029.3143 |
|            | 3034.5907  | 3041.5261 | 3046.4375 |
|            | 3049.5538  | 3066.4105 | 3081.2651 |
|            | 3092.3370  | 3095.5273 | 3100.3535 |
|            | 3181.8018  | 3612.2113 | 3767.7133 |
| <b>AT1</b> | -1657.0382 | 25.5449   | 40.2319   |
|            | 46.7158    | 65.4665   | 74.9717   |
|            | 96.7651    | 104.0446  | 130.5957  |
|            | 153.8498   | 159.2460  | 176.4740  |
|            | 200.9795   | 225.3494  | 237.1130  |
|            | 248.0755   | 267.9082  | 319.2325  |
|            | 370.6829   | 402.2098  | 435.9878  |
|            | 465.8551   | 503.1251  | 556.1754  |
|            | 569.6412   | 662.7506  | 732.5092  |
|            | 736.9837   | 762.9523  | 816.6749  |
|            | 830.9519   | 855.5052  | 896.3132  |
|            | 898.7577   | 913.8762  | 953.9164  |

|            |            |           |           |
|------------|------------|-----------|-----------|
|            | 983.0229   | 988.0741  | 1004.7761 |
|            | 1023.5176  | 1034.3325 | 1046.5886 |
|            | 1065.9823  | 1067.3246 | 1075.9565 |
|            | 1088.9136  | 1110.5796 | 1141.3802 |
|            | 1171.8563  | 1202.0710 | 1218.1004 |
|            | 1235.2665  | 1245.8161 | 1267.2628 |
|            | 1279.0639  | 1307.1379 | 1313.5022 |
|            | 1324.5019  | 1336.7009 | 1337.5178 |
|            | 1342.6940  | 1353.7207 | 1365.7160 |
|            | 1371.6047  | 1375.9920 | 1396.3831 |
|            | 1406.3512  | 1409.9364 | 1419.3684 |
|            | 1455.5588  | 1480.3177 | 1490.1627 |
|            | 1491.4427  | 1495.9713 | 1503.0419 |
|            | 1504.6778  | 1511.4110 | 1517.4643 |
|            | 1605.3294  | 3002.1448 | 3004.6159 |
|            | 3010.7177  | 3018.7042 | 3020.4663 |
|            | 3025.1527  | 3027.1013 | 3029.4527 |
|            | 3033.5109  | 3047.0949 | 3048.2549 |
|            | 3056.3774  | 3063.2646 | 3069.6126 |
|            | 3085.5288  | 3095.5008 | 3100.4672 |
|            | 3104.6832  | 3127.1305 | 3735.8191 |
| <b>AT2</b> | -1635.3991 | 22.7881   | 37.6877   |
|            | 48.6944    | 58.3084   | 83.0772   |
|            | 113.9006   | 127.6332  | 129.8525  |
|            | 158.5928   | 173.2674  | 188.6383  |
|            | 226.8945   | 246.1286  | 273.2481  |
|            | 298.1529   | 311.4814  | 397.0505  |
|            | 405.8422   | 432.5709  | 485.8788  |
|            | 488.7115   | 509.8996  | 530.4300  |
|            | 556.7674   | 621.9890  | 731.4990  |
|            | 748.6537   | 799.2390  | 807.8095  |
|            | 834.1694   | 873.9133  | 894.0798  |
|            | 909.4789   | 916.2317  | 946.0309  |
|            | 988.8181   | 991.7199  | 999.0269  |
|            | 1015.8219  | 1042.7816 | 1046.8762 |
|            | 1064.1142  | 1070.7945 | 1086.4565 |
|            | 1101.5234  | 1121.0638 | 1143.3345 |
|            | 1162.9772  | 1169.6931 | 1213.3357 |
|            | 1234.3335  | 1243.2914 | 1262.6738 |
|            | 1267.6033  | 1291.4738 | 1297.1283 |
|            | 1322.3538  | 1332.0825 | 1334.1442 |
|            | 1344.1102  | 1361.3751 | 1379.4114 |
|            | 1394.7559  | 1404.5308 | 1406.5365 |
|            | 1409.5192  | 1413.1840 | 1418.6963 |
|            | 1468.1670  | 1472.0922 | 1475.4457 |
|            | 1482.4423  | 1491.2254 | 1494.5430 |
|            | 1504.5901  | 1505.2718 | 1515.0849 |
|            | 1564.9663  | 2959.2401 | 3005.7960 |
|            | 3009.4230  | 3014.3625 | 3021.3170 |
|            | 3029.8809  | 3030.5877 | 3031.5501 |
|            | 3034.7154  | 3049.2404 | 3051.8365 |
|            | 3052.4482  | 3068.0171 | 3072.3059 |
|            | 3079.4318  | 3088.2943 | 3097.0808 |
|            | 3099.8416  | 3102.6564 | 3662.5789 |
| <b>B</b>   | 30.9917    | 44.7715   | 51.9830   |
|            | 65.5281    | 90.6140   | 102.6464  |

|            |           |           |           |
|------------|-----------|-----------|-----------|
|            | 117.8723  | 130.5133  | 154.1305  |
|            | 167.9528  | 178.1080  | 211.8365  |
|            | 224.5581  | 225.7768  | 248.7631  |
|            | 277.7388  | 317.0659  | 326.8238  |
|            | 357.0289  | 429.5074  | 450.5800  |
|            | 479.3404  | 493.7640  | 535.5053  |
|            | 570.8748  | 626.1550  | 729.7941  |
|            | 738.4206  | 774.8888  | 825.2346  |
|            | 835.8163  | 862.6410  | 898.6094  |
|            | 907.3357  | 918.5310  | 959.2876  |
|            | 968.9740  | 1000.4361 | 1012.6316 |
|            | 1032.6428 | 1051.2793 | 1063.1943 |
|            | 1068.7518 | 1087.3748 | 1121.4304 |
|            | 1141.2712 | 1167.2772 | 1182.4556 |
|            | 1209.3277 | 1219.1925 | 1236.0385 |
|            | 1260.6112 | 1283.4636 | 1295.8293 |
|            | 1320.0792 | 1324.2992 | 1334.1595 |
|            | 1341.6889 | 1346.2510 | 1364.4146 |
|            | 1366.4488 | 1387.9343 | 1397.3910 |
|            | 1408.4695 | 1412.2717 | 1418.7963 |
|            | 1419.7003 | 1436.1314 | 1477.5532 |
|            | 1487.3462 | 1491.6463 | 1492.0489 |
|            | 1493.1677 | 1499.7981 | 1504.8284 |
|            | 1508.9620 | 1509.8874 | 1516.6050 |
|            | 3005.0767 | 3008.6990 | 3018.4403 |
|            | 3020.8696 | 3028.9135 | 3031.0276 |
|            | 3031.7629 | 3037.8023 | 3041.6148 |
|            | 3050.7874 | 3057.8203 | 3061.3201 |
|            | 3064.4553 | 3081.7002 | 3089.2382 |
|            | 3097.7365 | 3102.2561 | 3117.0706 |
|            | 3121.8667 | 3134.6375 | 3615.0640 |
| <b>BP1</b> | 31.1597   | 40.0056   | 41.2408   |
|            | 57.0455   | 78.6674   | 98.5346   |
|            | 109.6538  | 122.3067  | 136.8137  |
|            | 160.8094  | 178.6540  | 218.1781  |
|            | 223.4023  | 251.0016  | 297.6838  |
|            | 307.1399  | 350.5084  | 408.1175  |
|            | 439.5138  | 464.7158  | 530.0776  |
|            | 548.6896  | 613.2316  | 649.0627  |
|            | 732.6544  | 742.4270  | 787.0651  |
|            | 803.3773  | 836.9638  | 866.7260  |
|            | 899.3018  | 932.2765  | 953.1893  |
|            | 978.4335  | 988.9760  | 1008.1381 |
|            | 1022.9552 | 1036.5169 | 1057.4223 |
|            | 1068.5293 | 1076.7008 | 1089.5547 |
|            | 1141.7275 | 1160.2840 | 1189.7672 |
|            | 1217.7255 | 1238.3735 | 1255.6846 |
|            | 1282.8604 | 1295.9353 | 1321.7481 |
|            | 1329.6299 | 1336.0140 | 1338.2523 |
|            | 1363.6547 | 1376.0232 | 1389.8976 |
|            | 1401.2318 | 1405.8581 | 1409.7876 |
|            | 1419.1907 | 1435.9070 | 1466.4815 |
|            | 1470.3149 | 1480.3828 | 1482.6313 |
|            | 1490.9630 | 1491.1493 | 1499.8986 |
|            | 1505.2010 | 1509.3975 | 1516.4767 |
|            | 1770.7280 | 3001.7062 | 3007.7079 |



|            |            |           |           |
|------------|------------|-----------|-----------|
|            | 3015.3414  | 3017.5096 | 3020.0138 |
|            | 3022.9483  | 3029.0273 | 3030.2820 |
|            | 3039.9822  | 3042.3275 | 3052.0435 |
|            | 3056.2369  | 3060.9129 | 3074.4871 |
|            | 3089.9825  | 3096.8108 | 3100.3575 |
|            | 3105.5016  | 3161.5896 | 3557.2925 |
| <b>BP2</b> | 23.5839    | 31.8525   | 43.5409   |
|            | 59.2539    | 86.1933   | 118.1129  |
|            | 122.1477   | 137.7997  | 143.6445  |
|            | 173.8058   | 186.5775  | 206.8146  |
|            | 238.3438   | 241.5814  | 258.0938  |
|            | 301.4342   | 310.7861  | 334.6349  |
|            | 356.1402   | 402.6854  | 438.6245  |
|            | 444.2882   | 477.8866  | 494.8041  |
|            | 534.3736   | 558.7360  | 646.1947  |
|            | 696.9512   | 731.8910  | 778.7634  |
|            | 800.1388   | 817.1777  | 861.1776  |
|            | 894.8376   | 903.5997  | 924.4847  |
|            | 946.4865   | 952.1569  | 979.1892  |
|            | 992.9727   | 1016.4808 | 1032.5863 |
|            | 1055.9183  | 1063.5820 | 1080.8483 |
|            | 1102.5893  | 1123.5634 | 1140.2746 |
|            | 1149.1152  | 1179.3641 | 1211.8304 |
|            | 1231.5558  | 1238.5551 | 1265.0614 |
|            | 1286.0409  | 1305.9707 | 1323.0791 |
|            | 1328.6392  | 1349.8063 | 1363.8839 |
|            | 1366.6312  | 1377.1708 | 1401.7410 |
|            | 1407.8595  | 1417.8322 | 1421.5987 |
|            | 1427.2970  | 1433.5472 | 1454.7641 |
|            | 1457.0311  | 1472.4538 | 1479.8725 |
|            | 1493.3090  | 1493.9063 | 1500.9062 |
|            | 1503.8970  | 1509.5335 | 1513.9115 |
|            | 2914.6483  | 2929.9983 | 2991.6344 |
|            | 3012.5088  | 3017.7155 | 3020.2856 |
|            | 3030.6212  | 3037.9619 | 3039.1954 |
|            | 3050.0458  | 3054.8127 | 3063.1224 |
|            | 3080.7605  | 3096.7442 | 3096.9966 |
|            | 3101.3138  | 3127.8013 | 3134.3796 |
|            | 3178.5912  | 3555.9086 | 3615.2076 |
| <b>BT1</b> | -1624.8399 | 27.0607   | 34.0807   |
|            | 44.7901    | 63.5315   | 72.9618   |
|            | 106.4186   | 124.3102  | 141.5281  |
|            | 153.3641   | 173.2809  | 187.3959  |
|            | 206.0244   | 213.5418  | 246.0464  |
|            | 249.6586   | 278.5193  | 284.2993  |
|            | 339.6716   | 360.7910  | 420.2709  |
|            | 435.3356   | 458.0859  | 504.6042  |
|            | 528.3454   | 562.6389  | 635.4651  |
|            | 731.1578   | 740.9393  | 784.8742  |
|            | 847.2230   | 858.1271  | 880.6691  |
|            | 898.0647   | 914.7969  | 947.2981  |
|            | 968.2764   | 973.9179  | 993.1003  |
|            | 1004.5053  | 1018.4003 | 1043.3142 |
|            | 1050.3918  | 1063.4100 | 1068.2045 |
|            | 1104.4394  | 1119.3831 | 1148.8959 |
|            | 1178.5013  | 1200.7332 | 1226.0394 |

|            |            |           |           |
|------------|------------|-----------|-----------|
|            | 1234.4693  | 1249.6922 | 1268.8020 |
|            | 1281.2474  | 1294.9833 | 1320.3769 |
|            | 1327.6709  | 1330.1406 | 1336.5037 |
|            | 1357.9318  | 1368.1135 | 1370.2511 |
|            | 1385.0823  | 1404.9951 | 1408.0828 |
|            | 1409.8083  | 1418.4459 | 1455.7810 |
|            | 1479.8691  | 1483.2542 | 1490.7807 |
|            | 1490.8705  | 1492.1018 | 1499.6871 |
|            | 1504.8243  | 1509.2764 | 1516.4578 |
|            | 1598.8519  | 3002.9770 | 3007.2356 |
|            | 3017.9646  | 3019.8019 | 3025.1034 |
|            | 3027.0481  | 3029.0146 | 3030.1665 |
|            | 3040.2649  | 3047.1081 | 3055.5661 |
|            | 3060.3779  | 3069.2428 | 3085.7187 |
|            | 3096.5058  | 3100.7859 | 3104.5129 |
|            | 3107.2918  | 3140.6035 | 3733.2099 |
| <b>BT2</b> | -1632.9562 | 22.9802   | 30.4320   |
|            | 44.7106    | 62.3690   | 81.6512   |
|            | 89.4141    | 112.7923  | 143.2135  |
|            | 146.9764   | 186.7162  | 212.8332  |
|            | 228.1253   | 243.1282  | 248.2451  |
|            | 263.8098   | 283.6018  | 317.7934  |
|            | 331.5984   | 369.1624  | 442.2202  |
|            | 458.8159   | 480.7999  | 489.0235  |
|            | 518.3250   | 552.3452  | 618.1750  |
|            | 732.2654   | 770.8261  | 790.1787  |
|            | 818.0123   | 864.9130  | 886.2317  |
|            | 900.2190   | 925.2194  | 939.7300  |
|            | 952.2805   | 973.6284  | 1002.5935 |
|            | 1007.5983  | 1023.2981 | 1039.6089 |
|            | 1050.6677  | 1066.3837 | 1101.3807 |
|            | 1113.4991  | 1129.3464 | 1135.8178 |
|            | 1150.8930  | 1165.5442 | 1169.1894 |
|            | 1214.6845  | 1238.7579 | 1251.7721 |
|            | 1270.5336  | 1285.4284 | 1310.2824 |
|            | 1318.7483  | 1331.7876 | 1347.8029 |
|            | 1353.6209  | 1364.0386 | 1370.0583 |
|            | 1383.6956  | 1396.7164 | 1407.2472 |
|            | 1412.2421  | 1416.8982 | 1421.4933 |
|            | 1461.5386  | 1471.2811 | 1474.6950 |
|            | 1490.7558  | 1493.0599 | 1501.0783 |
|            | 1505.1733  | 1508.2386 | 1513.9278 |
|            | 1574.2016  | 2957.1240 | 3009.2756 |
|            | 3011.8961  | 3018.3783 | 3031.7604 |
|            | 3032.9778  | 3040.4975 | 3042.6138 |
|            | 3047.4021  | 3055.5505 | 3060.0838 |
|            | 3063.9549  | 3073.5626 | 3088.0377 |
|            | 3095.4694  | 3098.4290 | 3103.6129 |
|            | 3113.9471  | 3140.1857 | 3756.9265 |
| <b>C</b>   | 37.2002    | 38.7074   | 49.8890   |
|            | 74.0645    | 79.1164   | 100.1786  |
|            | 111.2094   | 142.5215  | 157.9738  |
|            | 193.8972   | 201.3733  | 237.0029  |
|            | 244.8514   | 248.1519  | 257.1225  |
|            | 305.7324   | 327.6048  | 339.1488  |
|            | 349.7224   | 374.3236  | 424.2809  |

|            |           |           |           |
|------------|-----------|-----------|-----------|
|            | 438.4906  | 461.9449  | 529.2103  |
|            | 542.5613  | 573.1540  | 652.0238  |
|            | 743.3690  | 771.7671  | 824.6599  |
|            | 829.0012  | 847.9564  | 906.2807  |
|            | 907.1467  | 935.2048  | 939.8863  |
|            | 948.7457  | 967.1285  | 967.9737  |
|            | 1005.6925 | 1015.4366 | 1052.5531 |
|            | 1068.0607 | 1081.3856 | 1129.5046 |
|            | 1151.9305 | 1163.6449 | 1180.8281 |
|            | 1193.4114 | 1209.9792 | 1227.1361 |
|            | 1257.4150 | 1279.8489 | 1287.0820 |
|            | 1308.9696 | 1325.4971 | 1331.1200 |
|            | 1351.9277 | 1364.3975 | 1371.0466 |
|            | 1379.4904 | 1391.2326 | 1405.7657 |
|            | 1409.3755 | 1412.0177 | 1420.1307 |
|            | 1430.2542 | 1438.8710 | 1473.4872 |
|            | 1481.6909 | 1486.9122 | 1493.2094 |
|            | 1499.4462 | 1502.0319 | 1505.4318 |
|            | 1510.7049 | 1513.5319 | 1517.3310 |
|            | 3020.1409 | 3023.7948 | 3026.3148 |
|            | 3027.2610 | 3029.3013 | 3029.6023 |
|            | 3032.8635 | 3038.6017 | 3057.4849 |
|            | 3063.4899 | 3066.3339 | 3081.5506 |
|            | 3091.8866 | 3098.5715 | 3102.9530 |
|            | 3103.5247 | 3106.0247 | 3106.5698 |
|            | 3111.6513 | 3114.7029 | 3609.3089 |
| <b>CP2</b> | 37.9605   | 42.3548   | 54.0530   |
|            | 73.5013   | 80.2877   | 98.2994   |
|            | 118.5118  | 134.1077  | 138.1716  |
|            | 146.2582  | 165.0039  | 192.9922  |
|            | 242.9857  | 255.9796  | 270.3203  |
|            | 298.2268  | 308.4572  | 331.9598  |
|            | 354.6559  | 363.3380  | 391.6035  |
|            | 424.7772  | 462.4742  | 517.9413  |
|            | 535.5047  | 554.5302  | 659.2176  |
|            | 694.5140  | 740.7337  | 781.1392  |
|            | 802.5494  | 818.3809  | 854.9725  |
|            | 897.0646  | 921.2201  | 928.9496  |
|            | 941.0570  | 945.4671  | 959.5605  |
|            | 987.3408  | 1006.3202 | 1009.9161 |
|            | 1035.0753 | 1045.2429 | 1058.1293 |
|            | 1075.5634 | 1086.9095 | 1128.5547 |
|            | 1155.4232 | 1212.4060 | 1239.6014 |
|            | 1267.1013 | 1278.4612 | 1282.8020 |
|            | 1312.0011 | 1324.7369 | 1328.7030 |
|            | 1339.3272 | 1357.7382 | 1369.4320 |
|            | 1380.8515 | 1404.0408 | 1405.1416 |
|            | 1410.9728 | 1420.1807 | 1420.5471 |
|            | 1428.3902 | 1454.2311 | 1472.6917 |
|            | 1473.6725 | 1474.2581 | 1482.9224 |
|            | 1485.7718 | 1488.8777 | 1500.4408 |
|            | 1501.0880 | 1505.0486 | 1513.7710 |
|            | 2952.9645 | 2964.6114 | 3002.9468 |
|            | 3019.8822 | 3028.7916 | 3030.7013 |
|            | 3039.4271 | 3040.1738 | 3044.4727 |
|            | 3049.8751 | 3056.5625 | 3070.2064 |

|            |            |           |           |
|------------|------------|-----------|-----------|
|            | 3077.7592  | 3079.9943 | 3085.8923 |
|            | 3091.3791  | 3092.8314 | 3102.2546 |
|            | 3105.0754  | 3558.7354 | 3606.6355 |
| <b>CP1</b> | 27.6965    | 39.6985   | 42.8410   |
|            | 67.8282    | 70.6015   | 105.6281  |
|            | 116.7375   | 142.8242  | 188.5586  |
|            | 221.5033   | 228.7314  | 241.0266  |
|            | 242.8921   | 254.3937  | 302.7848  |
|            | 338.7891   | 352.8334  | 372.7533  |
|            | 402.8175   | 423.7140  | 462.3143  |
|            | 528.0735   | 556.3563  | 640.6615  |
|            | 695.9308   | 732.8417  | 801.4036  |
|            | 802.0462   | 838.2634  | 879.0586  |
|            | 884.2905   | 915.7319  | 934.2844  |
|            | 954.1993   | 966.4590  | 968.1667  |
|            | 998.8855   | 1027.2894 | 1040.3952 |
|            | 1052.6364  | 1083.3901 | 1101.6342 |
|            | 1143.6972  | 1154.7486 | 1166.3868 |
|            | 1191.5647  | 1218.1413 | 1257.0260 |
|            | 1279.9145  | 1286.5867 | 1317.1499 |
|            | 1328.9577  | 1342.7285 | 1359.4420 |
|            | 1378.7520  | 1387.3107 | 1397.8197 |
|            | 1406.8360  | 1408.9863 | 1422.4135 |
|            | 1428.1518  | 1436.9747 | 1455.8832 |
|            | 1474.3421  | 1474.7144 | 1493.5432 |
|            | 1496.2427  | 1501.6408 | 1505.9364 |
|            | 1510.5058  | 1511.5256 | 1517.3477 |
|            | 1765.0412  | 3006.8502 | 3011.0521 |
|            | 3021.8041  | 3023.0962 | 3026.6392 |
|            | 3031.0990  | 3041.9562 | 3046.0852 |
|            | 3054.3612  | 3056.7545 | 3062.9395 |
|            | 3082.5581  | 3085.0656 | 3087.7093 |
|            | 3095.4381  | 3101.7639 | 3105.8152 |
|            | 3108.4400  | 3111.2756 | 3547.1762 |
| <b>CT2</b> | -1619.0202 | 35.6687   | 42.8492   |
|            | 65.0710    | 81.9611   | 92.3272   |
|            | 112.4627   | 139.2803  | 169.8498  |
|            | 190.6340   | 196.5151  | 210.1766  |
|            | 234.7014   | 245.8834  | 255.2809  |
|            | 263.3440   | 304.9883  | 338.6435  |
|            | 361.2430   | 383.7811  | 391.8686  |
|            | 453.3657   | 484.9105  | 505.0459  |
|            | 541.3954   | 547.9648  | 590.8448  |
|            | 680.9393   | 742.4591  | 813.8903  |
|            | 823.7502   | 836.4213  | 864.8597  |
|            | 910.4070   | 912.4687  | 938.3474  |
|            | 946.0910   | 973.3273  | 978.5131  |
|            | 990.4876   | 992.1504  | 1010.4378 |
|            | 1022.0290  | 1052.7657 | 1072.1676 |
|            | 1087.4986  | 1114.1144 | 1142.8900 |
|            | 1162.8601  | 1171.1600 | 1193.9486 |
|            | 1244.7443  | 1249.6640 | 1266.3676 |
|            | 1274.1225  | 1289.4306 | 1302.9807 |
|            | 1329.7877  | 1341.3590 | 1364.8791 |
|            | 1368.5288  | 1375.7060 | 1401.7008 |
|            | 1404.5214  | 1411.1215 | 1419.5093 |

|            |            |           |           |
|------------|------------|-----------|-----------|
|            | 1420.2258  | 1421.4873 | 1469.5037 |
|            | 1478.8736  | 1481.0488 | 1482.6321 |
|            | 1485.3021  | 1495.3250 | 1499.3544 |
|            | 1504.1999  | 1505.3859 | 1513.2031 |
|            | 1568.7083  | 2994.2635 | 3002.4231 |
|            | 3011.0614  | 3017.9259 | 3021.3360 |
|            | 3028.4511  | 3031.3219 | 3052.8747 |
|            | 3059.8302  | 3066.7263 | 3078.0007 |
|            | 3080.8894  | 3082.2886 | 3084.1291 |
|            | 3095.0988  | 3102.4709 | 3105.1356 |
|            | 3116.4474  | 3118.8886 | 3651.0165 |
| <b>CT1</b> | -1614.3357 | 22.4176   | 36.6938   |
|            | 54.9531    | 72.0472   | 84.5161   |
|            | 88.3428    | 121.3339  | 132.0217  |
|            | 190.0875   | 206.7175  | 221.6127  |
|            | 233.9697   | 244.5024  | 250.9742  |
|            | 255.4154   | 286.7734  | 302.2953  |
|            | 329.0443   | 347.4989  | 389.1722  |
|            | 418.9111   | 438.5026  | 455.9079  |
|            | 498.6769   | 558.5994  | 588.0907  |
|            | 649.0030   | 743.7548  | 805.2268  |
|            | 827.0008   | 847.2692  | 869.2179  |
|            | 901.6233   | 918.3193  | 932.5013  |
|            | 939.2230   | 966.1023  | 973.8370  |
|            | 977.7975   | 990.0402  | 1013.6527 |
|            | 1045.2422  | 1066.4326 | 1072.6891 |
|            | 1109.4282  | 1121.2367 | 1161.1171 |
|            | 1172.5249  | 1190.7021 | 1191.7352 |
|            | 1199.7194  | 1243.9357 | 1272.6994 |
|            | 1288.3637  | 1292.7751 | 1320.7837 |
|            | 1335.4321  | 1338.8713 | 1360.0706 |
|            | 1364.4134  | 1371.6287 | 1380.2901 |
|            | 1397.9236  | 1404.7780 | 1408.6604 |
|            | 1420.0708  | 1427.5895 | 1459.1330 |
|            | 1472.0221  | 1475.9720 | 1493.5070 |
|            | 1499.9044  | 1500.4780 | 1504.8171 |
|            | 1509.6650  | 1512.9911 | 1516.4165 |
|            | 1595.6903  | 2992.8946 | 3018.4655 |
|            | 3023.4524  | 3028.2496 | 3031.6373 |
|            | 3040.9972  | 3042.3118 | 3048.6164 |
|            | 3061.4427  | 3065.0780 | 3082.3897 |
|            | 3085.5355  | 3089.2987 | 3096.6826 |
|            | 3103.4993  | 3103.7165 | 3106.9826 |
|            | 3108.0618  | 3110.7614 | 3732.6083 |

**Table S7:** Thermodynamic properties, standard enthalpy (kcal/mol), standard entropy (cal/mol/K), and heat capacities (300 – 1000 K) (cal/mol/K), for Benson Group Additivity.

| <b>Groups</b>    | $\Delta H^{\circ}_{298}$ | $\Delta S^{\circ}_{298}$ | <b>Cp300</b> | <b>Cp400</b> | <b>Cp500</b> | <b>Cp600</b> | <b>Cp800</b> | <b>Cp1000</b> |
|------------------|--------------------------|--------------------------|--------------|--------------|--------------|--------------|--------------|---------------|
| <b>c/c/h3</b>    | -10.01                   | 30.29                    | 6.22         | 7.74         | 9.24         | 10.62        | 12.84        | 14.59         |
| <b>c/c2/h2</b>   | -5                       | 9.65                     | 5.59         | 7.08         | 8.34         | 9.53         | 11.23        | 12.48         |
| <b>c/c2/h/o</b>  | -7.04                    | -12.57                   | 4.61         | 6.69         | 8.13         | 8.93         | 9.44         | 9.66          |
| <b>c/c/h2/o</b>  | -8.02                    | 9.15                     | 4.55         | 6.6          | 8.3          | 9.53         | 10.91        | 11.95         |
| <b>o/c/o</b>     | -5.5                     | 8.54                     | 3.9          | 4.31         | 4.6          | 4.84         | 5.32         | 5.8           |
| <b>o/h/o</b>     | -16.3                    | 27.83                    | 5.21         | 5.72         | 6.17         | 6.66         | 7.15         | 7.61          |
| <b>o/c/oj</b>    | 12.6                     | 36                       | 7.1          | 7.38         | 7.8          | 8.08         | 8.76         | 9.7           |
| <b>c/c/co/h2</b> | -5.41                    | 9.02                     | 5.62         | 6.89         | 8.01         | 9.35         | 10.99        | 12.19         |
| <b>co/c/h</b>    | -29.34                   | 34.45                    | 6.72         | 7.71         | 8.77         | 9.9          | 11.45        | 12.63         |
| <b>cj/c2/h</b>   | 40.95                    | 12.7                     | 4.4          | 5.21         | 6.3          | 6.8          | 7.73         | 8.36          |
| <b>c/c/cj/h2</b> | -4.95                    | 9.42                     | 5.5          | 6.95         | 8.25         | 9.35         | 11.07        | 12.34         |
| <b>co/c2</b>     | -31.5                    | 15.14                    | 5.59         | 6.09         | 6.81         | 7.48         | 8.54         | 9.14          |
| <b>c/co/h3</b>   | -10.31                   | 30.8                     | 6.47         | 8.03         | 9.48         | 10.59        | 12.68        | 14.26         |
| <b>c/c3/h</b>    | -2.09                    | -11.48                   | 4.93         | 6.8          | 8.03         | 8.73         | 9.72         | 10.27         |
| <b>cj/c3</b>     | 38                       | -10.77                   | 4.06         | 4.92         | 5.42         | 5.75         | 6.27         | 6.35          |
| <b>c/cj/h3</b>   | -10.08                   | 30.41                    | 6.19         | 7.74         | 9.24         | 10.62        | 12.84        | 14.59         |

**Table S8:** Composition of groups for  $\alpha,\gamma$ -OOQOOH radical A, B, and C in Fig. 5, and derived transition states and products.

| <b>Compound</b> | <b>group</b> | <b>quantity</b> | <b>group</b> | <b>quantity</b> |
|-----------------|--------------|-----------------|--------------|-----------------|
| <b>A</b>        | c/c/h3       | 1               | c/c2/h2      | 7               |
|                 | c/c2/h/o     | 1               | c/c/h2/o     | 1               |
|                 | o/c/o        | 1               | o/h/o        | 1               |
|                 | o/c/oj       | 1               |              | 1               |
| <b>AP1</b>      | c/c/h3       | 1               | c/c2/h2      | 6               |
|                 | c/c2/h/o     | 1               | c/c/co/h2    | 1               |
|                 | o/c/o        | 1               | o/h/o        | 1               |
|                 | co/c/h       | 1               |              |                 |
| <b>AP2</b>      | c/c/h3       | 1               | c/c2/h2      | 4               |
|                 | cj/c2/h      | 1               | c/c/cj/h2    | 2               |
|                 | c/c2/h/o     | 1               | c/c/h2/o     | 1               |
|                 | o/c/o        | 2               | o/h/o        | 2               |
| <b>B</b>        | c/c/h3       | 2               | c/c2/h2      | 6               |
|                 | o/c/o        | 1               | o/h/o        | 1               |
|                 | c/c2/h/o     | 2               | o/c/oj       | 1               |
| <b>BP1</b>      | c/c/h3       | 1               | c/c2/h2      | 5               |
|                 | o/c/o        | 1               | o/h/o        | 1               |
|                 | co/c2        | 1               | c/co/h3      | 1               |
|                 | c/c2/h/o     | 1               | c/c/co/h2    | 1               |
| <b>BP2</b>      | c/c/h3       | 2               | c/c2/h2      | 3               |
|                 | cj/c2/h      | 1               | c/c/cj/h2    | 2               |
|                 | o/c/o        | 2               | o/h/o        | 2               |
|                 | c/c2/h/o     | 2               |              |                 |
| <b>C</b>        | c/c/h3       | 3               | c/c2/h2      | 4               |
|                 | o/c/o        | 1               | o/h/o        | 1               |
|                 | c/c3/h       | 1               | c/c2/h/o     | 2               |
|                 | o/c/oj       | 1               |              |                 |
| <b>CP2</b>      | c/c/h3       | 1               | c/c2/h2      | 3               |
|                 | c/cj/h3      | 2               | c/c/cj/h2    | 1               |
|                 | cj/h3        | 1               | c/c2/h/o     | 2               |
|                 | o/c/o        | 2               | o/h/o        | 2               |
| <b>CP1</b>      | c/c/h3       | 3               | c/c2/h2      | 2               |
|                 | o/c/o        | 1               | o/h/o        | 1               |
|                 | co/c2        | 1               | c/c/co/h2    | 2               |
|                 | c/c3/h       | 1               | c/c2/h/o     | 1               |

**Table S9:** Reaction pathways and energy barriers for  $\alpha,\gamma$ -OOQOOH radical A, B, and C in Fig 5. All in kcal/mol.

|                    | Reactants |   | Transition States |   | Products     | Energy Barrier |
|--------------------|-----------|---|-------------------|---|--------------|----------------|
| $\Delta H^0_{298}$ | -69.3     |   | -49.9             |   | -103.6 + 8.9 | <b>19.3</b>    |
| <b>Reaction</b>    | A         | → | AT1               | → | AP1 + OH     |                |
| $\Delta H^0_{298}$ | -69.3     |   | -51.5             |   | -57.6        | <b>17.8</b>    |
| <b>Reaction</b>    | A         | → | AT2               | → | AP2          |                |
| $\Delta H^0_{298}$ | -73.3     |   | -56.1             |   | -111.1 + 8.9 | <b>17.2</b>    |
| <b>Reaction</b>    | B         | → | BT1               | → | BP1 + OH     |                |
| $\Delta H^0_{298}$ | -73.3     |   | -55.1             |   | -61.7        | <b>18.2</b>    |
| <b>Reaction</b>    | B         | → | BT2               | → | BP2          |                |
| $\Delta H^0_{298}$ | -75.4     |   | -61.1             |   | -69.8        | <b>14.3</b>    |
| <b>Reaction</b>    | C         | → | CT2               | → | CP2          |                |
| $\Delta H^0_{298}$ | -75.4     |   | -58.1             |   | -113.3 + 8.9 | <b>17.3</b>    |
| <b>Reaction</b>    | C         | → | CT1               | → | CP1 + OH     |                |



**Table S10:** Cartesian coordinates for ax-hydroperoxy-cyclohexyl-ax-peroxy (ax-OOH-ax-OO) and its radicals and transition states at the CBS-QB3 level of theory. Naming of species in Fig. S16.

|           |          |          |          |
|-----------|----------|----------|----------|
| <b>RC</b> |          |          |          |
| C         | -0.00486 | -0.00731 | -0.00042 |
| C         | -0.01052 | -0.00672 | 1.533125 |
| C         | 1.387618 | -0.00173 | 2.14473  |
| C         | 2.321755 | -1.04784 | 1.545984 |
| C         | 2.330197 | -1.01672 | 0.010016 |
| C         | 0.909932 | -1.09617 | -0.57016 |
| O         | 0.519411 | 1.213618 | -0.54185 |
| O         | -0.30682 | 2.31625  | -0.10657 |
| O         | 2.063433 | 1.300586 | 1.910882 |
| O         | 1.352426 | 2.330747 | 2.310489 |
| H         | -1.03053 | -0.13451 | -0.36515 |
| H         | -0.52394 | -0.90872 | 1.883374 |
| H         | -0.57804 | 0.845231 | 1.906334 |
| H         | 1.329061 | -0.09264 | 3.232535 |
| H         | 1.981289 | -2.02745 | 1.901625 |
| H         | 3.330013 | -0.90133 | 1.943385 |
| H         | 2.934124 | -1.84592 | -0.36893 |
| H         | 2.80583  | -0.09416 | -0.33034 |
| H         | 0.934729 | -1.00489 | -1.65887 |
| H         | 0.459106 | -2.06826 | -0.33848 |
| H         | 0.250475 | 2.697618 | 0.594821 |
| <b>PI</b> |          |          |          |
| C         | -0.01113 | -0.02128 | 0.010576 |
| C         | -0.00875 | -0.0289  | 1.503956 |
| C         | 1.292011 | -0.00702 | 2.241559 |
| C         | 2.279557 | -1.02709 | 1.651688 |
| C         | 2.376604 | -0.91768 | 0.122554 |
| C         | 1.002361 | -1.03277 | -0.55402 |
| O         | 0.442642 | 1.242655 | -0.54139 |
| O         | -0.38236 | 2.297286 | 0.05576  |
| O         | 1.973605 | 1.262179 | 2.101618 |
| O         | 1.097361 | 2.312592 | 2.576802 |
| H         | -1.01678 | -0.21267 | -0.37819 |
| H         | -0.9442  | 0.046034 | 2.042893 |
| H         | 1.13057  | -0.19113 | 3.308794 |
| H         | 1.940397 | -2.02844 | 1.940028 |
| H         | 3.258568 | -0.87124 | 2.113406 |
| H         | 3.036311 | -1.70201 | -0.26089 |

|           |          |          |          |
|-----------|----------|----------|----------|
| H         | 2.828708 | 0.04079  | -0.13996 |
| H         | 1.085496 | -0.88689 | -1.63511 |
| H         | 0.582587 | -2.03241 | -0.39597 |
| H         | -0.37459 | 2.929124 | -0.67569 |
| H         | 0.63276  | 2.544931 | 1.7522   |
| <hr/>     |          |          |          |
| <b>P2</b> |          |          |          |
| C         | -0.00758 | -0.00466 | -0.00194 |
| C         | -0.01994 | -0.00492 | 1.530921 |
| C         | 1.380927 | 0.006394 | 2.152732 |
| C         | 2.328157 | -0.92149 | 1.470763 |
| C         | 2.26167  | -1.14951 | -0.00442 |
| C         | 0.817536 | -1.17294 | -0.54725 |
| O         | 0.629725 | 1.151228 | -0.56365 |
| O         | 0.04729  | 2.352901 | -0.00677 |
| O         | 1.802407 | 1.411488 | 2.051186 |
| O         | 2.990781 | 1.59898  | 2.849259 |
| H         | -1.03999 | -0.05443 | -0.36935 |
| H         | -0.53465 | -0.91167 | 1.863692 |
| H         | -0.59131 | 0.845044 | 1.90643  |
| H         | 1.325399 | -0.20953 | 3.22311  |
| H         | 3.177922 | -1.29519 | 2.031102 |
| H         | 2.803893 | -0.34384 | -0.52392 |
| H         | 0.825126 | -1.13574 | -1.63931 |
| H         | 0.32038  | -2.10364 | -0.25542 |
| H         | 0.683889 | 2.528051 | 0.707833 |
| H         | 3.678533 | 1.580896 | 2.168744 |
| H         | 2.778685 | -2.07736 | -0.26826 |
| <hr/>     |          |          |          |
| <b>P3</b> |          |          |          |
| C         | -0.00826 | -0.00401 | -0.00205 |
| C         | -0.02255 | -0.0063  | 1.532241 |
| C         | 1.370783 | 0.005782 | 2.166499 |
| C         | 2.281941 | -1.09108 | 1.586675 |
| C         | 2.192025 | -1.20902 | 0.101648 |
| C         | 0.853841 | -1.14907 | -0.56    |
| O         | 0.598049 | 1.165842 | -0.5664  |
| O         | -0.00269 | 2.352942 | 0.00386  |
| O         | 1.87656  | 1.333461 | 1.927284 |
| O         | 3.073051 | 1.520311 | 2.722545 |
| H         | -1.03937 | -0.08139 | -0.36868 |
| H         | -0.5367  | -0.91499 | 1.863537 |
| H         | -0.60318 | 0.84078  | 1.899422 |
| H         | 1.288224 | -0.11609 | 3.251473 |
| H         | 1.970688 | -2.03685 | 2.068315 |

|           |          |          |          |
|-----------|----------|----------|----------|
| H         | 3.307622 | -0.91873 | 1.921458 |
| H         | 3.069656 | -1.46862 | -0.47667 |
| H         | 0.950834 | -1.0271  | -1.64153 |
| H         | 0.290461 | -2.08571 | -0.40155 |
| H         | 0.650519 | 2.546056 | 0.697437 |
| H         | 3.737853 | 1.594627 | 2.023734 |
| <hr/>     |          |          |          |
| <b>P4</b> |          |          |          |
| C         | -0.00442 | 0.002921 | 0.005206 |
| C         | -0.00565 | -0.01016 | 1.547177 |
| C         | 1.373757 | 0.004687 | 2.20986  |
| C         | 2.316728 | -1.03542 | 1.604287 |
| C         | 2.405387 | -0.95128 | 0.070193 |
| C         | 1.072823 | -0.83251 | -0.59168 |
| O         | -0.03052 | 1.364484 | -0.52794 |
| O         | 1.306186 | 1.912965 | -0.63525 |
| O         | 1.848778 | 1.360622 | 2.048552 |
| O         | 3.140749 | 1.4918   | 2.692041 |
| H         | -0.98724 | -0.3416  | -0.33556 |
| H         | -0.5001  | -0.92996 | 1.877166 |
| H         | -0.60812 | 0.826993 | 1.909621 |
| H         | 1.267384 | -0.1709  | 3.287044 |
| H         | 1.935841 | -2.02035 | 1.89821  |
| H         | 3.305587 | -0.92764 | 2.053247 |
| H         | 2.950897 | -1.81877 | -0.31491 |
| H         | 3.005392 | -0.06962 | -0.20508 |
| H         | 0.980359 | -1.08784 | -1.64166 |
| H         | 1.537412 | 2.083425 | 0.295837 |
| H         | 2.897526 | 2.03232  | 3.45697  |
| <hr/>     |          |          |          |
| <b>P5</b> |          |          |          |
| C         | -0.00101 | 0.005751 | -0.00032 |
| C         | -0.00294 | 0.007149 | 1.533703 |
| C         | 1.37834  | -0.00441 | 2.137645 |
| C         | 2.492585 | -0.18336 | 1.430592 |
| C         | 2.493645 | -0.406   | -0.05894 |
| C         | 1.121054 | -0.86249 | -0.5701  |
| O         | 0.166726 | 1.38851  | -0.3629  |
| O         | 0.072951 | 1.485317 | -1.81111 |
| H         | -0.97512 | -0.32731 | -0.37946 |
| H         | -0.57241 | -0.86433 | 1.881427 |
| H         | -0.56036 | 0.884604 | 1.880074 |
| H         | 1.438346 | 0.148816 | 3.211764 |
| H         | 3.45516  | -0.15563 | 1.934182 |
| H         | 3.255113 | -1.14624 | -0.32676 |

|            |          |          |          |
|------------|----------|----------|----------|
| H          | 2.783116 | 0.523567 | -0.56413 |
| H          | 1.082857 | -0.83391 | -1.66042 |
| H          | 0.934291 | -1.89774 | -0.26178 |
| H          | -0.76684 | 1.95699  | -1.89397 |
| <hr/>      |          |          |          |
| <b>P6</b>  |          |          |          |
| C          | -0.00316 | 0.001818 | -0.00196 |
| C          | -0.00435 | -0.00512 | 1.503786 |
| C          | 1.116614 | -0.00172 | 2.226033 |
| C          | 2.49794  | 0.048554 | 1.630476 |
| C          | 2.472884 | 0.451376 | 0.150588 |
| C          | 1.371884 | -0.30552 | -0.59791 |
| O          | -0.45546 | 1.327157 | -0.35812 |
| O          | -0.76638 | 1.318953 | -1.78298 |
| H          | -0.74766 | -0.70936 | -0.38059 |
| H          | -0.97414 | -0.00977 | 1.990884 |
| H          | 1.046928 | -0.04266 | 3.310383 |
| H          | 2.97372  | -0.93573 | 1.751062 |
| H          | 3.116668 | 0.744447 | 2.208048 |
| H          | 3.448121 | 0.271345 | -0.31012 |
| H          | 2.271133 | 1.524203 | 0.07171  |
| H          | 1.35747  | -0.04648 | -1.65855 |
| H          | 1.544151 | -1.38682 | -0.52978 |
| H          | -1.72369 | 1.447551 | -1.74544 |
| <hr/>      |          |          |          |
| <b>TS1</b> |          |          |          |
| C          | -0.00576 | -0.00733 | 0.000443 |
| C          | -0.00949 | -0.0108  | 1.515059 |
| C          | 1.353313 | 0.002177 | 2.228827 |
| C          | 2.410101 | -0.89128 | 1.581901 |
| C          | 2.409709 | -0.80487 | 0.04984  |
| C          | 1.008055 | -1.04112 | -0.53129 |
| O          | 0.445311 | 1.227647 | -0.57311 |
| O          | -0.49918 | 2.275299 | -0.25155 |
| O          | 1.777143 | 1.375896 | 2.132174 |
| O          | 0.592163 | 2.109162 | 2.421376 |
| H          | 1.208584 | -0.24998 | 3.28566  |
| H          | -0.16151 | 1.25854  | 1.979068 |
| H          | -0.77169 | -0.64771 | 1.961703 |
| H          | -1.01075 | -0.21744 | -0.37958 |
| H          | 1.019969 | -0.97011 | -1.62205 |
| H          | 0.647788 | -2.04297 | -0.27177 |
| H          | 3.105495 | -1.54474 | -0.35631 |
| H          | 2.766363 | 0.178228 | -0.26331 |
| H          | 2.203842 | -1.92042 | 1.898943 |

|            |          |          |          |
|------------|----------|----------|----------|
| H          | 3.389702 | -0.62822 | 1.992795 |
| H          | -0.02739 | 2.719474 | 0.47427  |
| <hr/>      |          |          |          |
| <b>TS2</b> |          |          |          |
| C          | -0.01219 | 0.009882 | -0.00748 |
| C          | -0.02054 | 0.010752 | 1.525738 |
| C          | 1.37014  | -0.01049 | 2.149414 |
| C          | 2.406836 | 0.886551 | 1.451822 |
| C          | 2.345461 | 0.952839 | -0.0573  |
| C          | 0.889464 | 1.117877 | -0.56145 |
| O          | 0.539852 | -1.18345 | -0.58374 |
| O          | 0.004043 | -2.35688 | 0.067789 |
| O          | 1.915357 | -1.34112 | 2.016534 |
| O          | 3.293729 | -1.16262 | 2.303129 |
| H          | 1.331858 | 0.24006  | 3.215119 |
| H          | 3.331944 | -0.01879 | 1.841191 |
| H          | 2.613416 | 1.827386 | 1.961742 |
| H          | 2.967209 | 1.770753 | -0.42798 |
| H          | 2.731772 | 0.023796 | -0.48348 |
| H          | 0.878464 | 1.085884 | -1.65387 |
| H          | 0.478891 | 2.086906 | -0.25854 |
| H          | -1.04209 | 0.134356 | -0.36498 |
| H          | -0.53155 | 0.920668 | 1.857257 |
| H          | -0.60335 | -0.83253 | 1.900602 |
| H          | 0.734928 | -2.54536 | 0.681177 |
| <hr/>      |          |          |          |
| <b>TS3</b> |          |          |          |
| C          | -0.00855 | -0.00946 | -0.00407 |
| C          | -0.01086 | -0.00389 | 1.539794 |
| C          | 1.341145 | 0.001516 | 2.273927 |
| C          | 2.353208 | -0.95532 | 1.605932 |
| C          | 2.452589 | -0.53784 | 0.163629 |
| C          | 1.175737 | -0.78691 | -0.61172 |
| O          | 0.117246 | 1.27669  | -0.64873 |
| O          | -0.46562 | 2.338915 | 0.130537 |
| O          | 1.992774 | 1.276502 | 2.357722 |
| O          | 2.173112 | 1.794876 | 1.051817 |
| H          | -0.95968 | -0.44655 | -0.33037 |
| H          | -0.51843 | -0.9249  | 1.847725 |
| H          | -0.62739 | 0.82386  | 1.89022  |
| H          | 1.188664 | -0.25054 | 3.326306 |
| H          | 1.980566 | -1.98621 | 1.694271 |
| H          | 3.30901  | -0.89331 | 2.128912 |
| H          | 3.390264 | -0.73752 | -0.35189 |
| H          | 2.472831 | 0.812734 | 0.409088 |

|            |          |          |          |
|------------|----------|----------|----------|
| H          | 1.269802 | -0.49792 | -1.66066 |
| H          | 0.945233 | -1.86248 | -0.59452 |
| H          | 0.343609 | 2.648001 | 0.575864 |
| <hr/>      |          |          |          |
| <b>TS4</b> |          |          |          |
| C          | -0.01344 | 0.001176 | 0.000941 |
| C          | -0.01294 | 0.020354 | 1.547109 |
| C          | 1.401439 | -0.00808 | 2.138239 |
| C          | 2.231987 | 1.196559 | 1.676068 |
| C          | 2.019979 | 1.518909 | 0.167195 |
| C          | 1.343357 | 0.371832 | -0.55386 |
| O          | -0.42053 | -1.32543 | -0.35632 |
| O          | -0.5824  | -1.35564 | -1.80266 |
| O          | 2.019549 | -1.28673 | 1.823185 |
| O          | 2.822595 | -1.20374 | 0.660329 |
| H          | -0.77177 | 0.694665 | -0.39272 |
| H          | -0.52532 | 0.920117 | 1.902301 |
| H          | -0.58344 | -0.83945 | 1.903523 |
| H          | 1.342695 | -0.03007 | 3.229574 |
| H          | 3.283206 | 0.990558 | 1.878552 |
| H          | 1.945393 | 2.056022 | 2.287958 |
| H          | 2.976014 | 1.747824 | -0.30759 |
| H          | 1.401231 | 2.421881 | 0.059353 |
| H          | 1.415415 | 0.354068 | -1.63931 |
| H          | 2.138491 | -0.66224 | -0.12344 |
| H          | 0.05128  | -2.05116 | -2.02545 |
| <hr/>      |          |          |          |
| <b>TS5</b> |          |          |          |
| C          | -0.00338 | 0.004681 | -1.2E-05 |
| C          | -0.01109 | 0.007337 | 1.530626 |
| C          | 1.363418 | -0.00382 | 2.120584 |
| C          | 2.517809 | 0.287072 | 1.38964  |
| C          | 2.424483 | 0.779226 | -0.06448 |
| C          | 0.981536 | 1.048588 | -0.53165 |
| O          | 0.466383 | -1.23416 | -0.54284 |
| O          | -0.39418 | -2.30677 | -0.08664 |
| O          | 1.644434 | -2.24694 | 2.044366 |
| O          | 2.774144 | -2.26932 | 1.455616 |
| H          | -1.01545 | 0.193433 | -0.37493 |
| H          | -0.52129 | 0.919897 | 1.872772 |
| H          | -0.60658 | -0.82557 | 1.909098 |
| H          | 1.429357 | -0.07388 | 3.200611 |
| H          | 2.906095 | -0.95231 | 1.315771 |
| H          | 3.354877 | 0.678525 | 1.968666 |
| H          | 2.884659 | 0.045676 | -0.73129 |

|            |          |          |          |
|------------|----------|----------|----------|
| H          | 3.01118  | 1.696271 | -0.16713 |
| H          | 0.642934 | 2.026502 | -0.17294 |
| H          | 0.938369 | 1.072988 | -1.62285 |
| H          | 0.182883 | -2.71623 | 0.579818 |
| <hr/>      |          |          |          |
| <b>TS6</b> |          |          |          |
| C          | 0.001976 | -0.00504 | -0.0115  |
| C          | 0.002042 | -0.04229 | 1.522212 |
| C          | 1.203653 | 0.007955 | 2.23328  |
| C          | 2.542509 | 0.205866 | 1.594024 |
| C          | 2.441847 | 0.66049  | 0.134679 |
| C          | 1.399498 | -0.17851 | -0.61402 |
| O          | -0.43813 | 1.254809 | -0.55106 |
| O          | -1.8001  | 1.486215 | -0.09755 |
| O          | 0.908293 | 2.103006 | 2.949017 |
| O          | -0.25283 | 2.30769  | 2.465413 |
| H          | -0.67443 | -0.7796  | -0.3879  |
| H          | -0.80265 | -0.6183  | 1.976984 |
| H          | -0.4093  | 1.160419 | 1.892742 |
| H          | 1.206893 | -0.3158  | 3.268613 |
| H          | 3.064151 | -0.76306 | 1.645233 |
| H          | 3.143426 | 0.897777 | 2.191295 |
| H          | 3.418328 | 0.57774  | -0.34958 |
| H          | 2.152944 | 1.714403 | 0.094765 |
| H          | 1.664861 | -1.24048 | -0.56139 |
| H          | 1.357658 | 0.093509 | -1.67124 |
| H          | -1.68505 | 2.334021 | 0.354617 |

**Table S11:** Frequencies for ax-hydroperoxy-cyclohexyl-ax-peroxy (ax-OOH-ax-OO) and radicals and transition states at the B3LYP/6-311++G(2df,2pd) level of theory. Naming of species in Fig. S16.

| Species' Names | Frequencies (cm <sup>-1</sup> ) |      |      |      |      |      |      |      |
|----------------|---------------------------------|------|------|------|------|------|------|------|
| <b>RC</b>      | 87                              | 100  | 133  | 181  | 223  | 254  | 322  |      |
|                | 331                             | 379  | 407  | 441  | 489  | 537  | 587  |      |
|                | 710                             | 775  | 804  | 827  | 875  | 883  | 916  |      |
|                | 933                             | 973  | 1020 | 1038 | 1078 | 1086 | 1140 |      |
|                | 1144                            | 1202 | 1227 | 1257 | 1292 | 1321 | 1341 |      |
|                | 1352                            | 1366 | 1380 | 1388 | 1402 | 1404 | 1413 |      |
|                | 1473                            | 1477 | 1489 | 1503 | 3020 | 3028 | 3031 |      |
|                | 3048                            | 3048 | 3065 | 3073 | 3080 | 3092 | 3115 | 3682 |
|                | <b>P1</b>                       | 88   | 113  | 142  | 178  | 187  | 216  | 245  |
| 275            |                                 | 317  | 339  | 433  | 465  | 480  | 532  |      |
| 587            |                                 | 626  | 737  | 800  | 806  | 862  | 882  |      |
| 895            |                                 | 931  | 938  | 950  | 1007 | 1031 | 1057 |      |
| 1117           |                                 | 1131 | 1167 | 1214 | 1286 | 1312 | 1327 |      |
| 1340           |                                 | 1359 | 1366 | 1369 | 1385 | 1400 | 1415 |      |
| 1442           |                                 | 1474 | 1484 | 1497 | 3025 | 3027 | 3037 |      |
| 3040           |                                 | 3045 | 3068 | 3073 | 3094 | 3201 | 3673 | 3790 |
| <b>P2</b>      |                                 | 81   | 88   | 113  | 157  | 198  | 247  | 272  |
|                | 297                             | 328  | 386  | 395  | 468  | 488  | 546  |      |
|                | 572                             | 606  | 731  | 779  | 804  | 852  | 874  |      |
|                | 910                             | 936  | 956  | 972  | 1009 | 1033 | 1083 |      |
|                | 1086                            | 1135 | 1170 | 1218 | 1265 | 1313 | 1329 |      |
|                | 1340                            | 1362 | 1368 | 1370 | 1388 | 1402 | 1411 |      |
|                | 1413                            | 1465 | 1474 | 1489 | 2956 | 3013 | 3040 |      |
|                | 3048                            | 3053 | 3060 | 3086 | 3102 | 3177 | 3693 | 3761 |
|                | <b>P3</b>                       | 80   | 86   | 119  | 151  | 189  | 250  | 258  |
| 298            |                                 | 317  | 356  | 399  | 430  | 470  | 478  |      |
| 598            |                                 | 602  | 768  | 816  | 825  | 852  | 876  |      |
| 893            |                                 | 943  | 953  | 964  | 995  | 1065 | 1074 |      |
| 1102           |                                 | 1123 | 1153 | 1238 | 1251 | 1277 | 1332 |      |
| 1347           |                                 | 1353 | 1365 | 1378 | 1382 | 1404 | 1409 |      |
| 1413           |                                 | 1461 | 1465 | 1480 | 2908 | 2927 | 3014 |      |
| 3035           |                                 | 3050 | 3075 | 3077 | 3102 | 3189 | 3705 | 3771 |
| <b>P4</b>      |                                 | 81   | 97   | 135  | 170  | 224  | 242  | 258  |
|                | 281                             | 351  | 376  | 413  | 458  | 478  | 538  |      |
|                | 586                             | 670  | 725  | 733  | 827  | 852  | 878  |      |
|                | 895                             | 931  | 944  | 958  | 1017 | 1046 | 1065 |      |
|                | 1097                            | 1139 | 1165 | 1206 | 1280 | 1311 | 1324 |      |
|                | 1341                            | 1364 | 1365 | 1376 | 1392 | 1400 | 1410 |      |



|            |       |      |      |      |      |      |      |      |
|------------|-------|------|------|------|------|------|------|------|
|            | 1450  | 1464 | 1467 | 1491 | 2956 | 3015 | 3024 |      |
|            | 3032  | 3046 | 3050 | 3085 | 3095 | 3174 | 3655 | 3768 |
| <b>P5</b>  | 88    | 127  | 185  | 213  | 283  | 348  | 391  |      |
|            | 436   | 569  | 603  | 658  | 765  | 816  | 861  |      |
|            | 889   | 910  | 941  | 975  | 1004 | 1009 | 1050 |      |
|            | 1084  | 1102 | 1170 | 1204 | 1244 | 1274 | 1334 |      |
|            | 1354  | 1365 | 1367 | 1388 | 1400 | 1428 | 1467 |      |
|            | 1478  | 1490 | 1716 | 3006 | 3017 | 3019 | 3032 |      |
|            | 3046  | 3049 | 3094 | 3139 | 3161 | 3778 |      |      |
| <b>P6</b>  | 83    | 140  | 200  | 228  | 268  | 327  | 430  |      |
|            | 464   | 516  | 581  | 712  | 736  | 827  | 853  |      |
|            | 890   | 908  | 935  | 960  | 1016 | 1022 | 1064 |      |
|            | 1088  | 1107 | 1165 | 1185 | 1260 | 1280 | 1339 |      |
|            | 1349  | 1365 | 1369 | 1376 | 1399 | 1428 | 1473 |      |
|            | 1488  | 1500 | 1704 | 2989 | 3008 | 3025 | 3033 |      |
|            | 3045  | 3075 | 3089 | 3141 | 3171 | 3778 |      |      |
| <b>TS1</b> | -2191 | 96   | 133  | 178  | 216  | 250  | 290  |      |
|            | 317   | 364  | 438  | 468  | 498  | 564  | 605  |      |
|            | 623   | 754  | 783  | 819  | 833  | 877  | 890  |      |
|            | 924   | 943  | 949  | 973  | 996  | 1042 | 1052 |      |
|            | 1091  | 1141 | 1151 | 1182 | 1222 | 1282 | 1306 |      |
|            | 1313  | 1351 | 1355 | 1376 | 1381 | 1391 | 1406 |      |
|            | 1422  | 1474 | 1484 | 1499 | 1704 | 3017 | 3029 |      |
|            | 3032  | 3042 | 3049 | 3067 | 3079 | 3097 | 3128 | 3685 |
| <b>TS2</b> | -2160 | 58   | 127  | 148  | 223  | 244  | 286  |      |
|            | 330   | 380  | 432  | 451  | 504  | 544  | 596  |      |
|            | 675   | 719  | 798  | 820  | 826  | 877  | 889  |      |
|            | 926   | 937  | 964  | 983  | 994  | 1045 | 1082 |      |
|            | 1090  | 1128 | 1147 | 1191 | 1224 | 1264 | 1322 |      |
|            | 1330  | 1335 | 1357 | 1364 | 1377 | 1395 | 1403 |      |
|            | 1408  | 1470 | 1488 | 1493 | 1703 | 3008 | 3024 |      |
|            | 3040  | 3051 | 3052 | 3083 | 3091 | 3095 | 3117 | 3712 |
| <b>TS3</b> | -1814 | 80   | 146  | 195  | 226  | 302  | 331  |      |
|            | 377   | 403  | 452  | 508  | 523  | 538  | 596  |      |
|            | 656   | 730  | 752  | 821  | 842  | 888  | 895  |      |
|            | 912   | 935  | 971  | 986  | 1019 | 1052 | 1057 |      |
|            | 1081  | 1116 | 1141 | 1151 | 1219 | 1252 | 1291 |      |
|            | 1313  | 1338 | 1345 | 1358 | 1378 | 1385 | 1403 |      |
|            | 1408  | 1463 | 1464 | 1479 | 1558 | 2984 | 2990 |      |
|            | 3010  | 3041 | 3073 | 3084 | 3095 | 3112 | 3126 | 3676 |
| <b>TS4</b> | -1889 | 52   | 132  | 168  | 199  | 234  | 246  |      |
|            | 302   | 342  | 392  | 439  | 480  | 524  | 580  |      |
|            | 635   | 755  | 766  | 813  | 847  | 889  | 896  |      |

|            |       |      |      |      |      |      |      |      |
|------------|-------|------|------|------|------|------|------|------|
|            | 916   | 950  | 954  | 975  | 1026 | 1046 | 1095 |      |
|            | 1105  | 1112 | 1153 | 1201 | 1242 | 1252 | 1275 |      |
|            | 1322  | 1330 | 1337 | 1352 | 1367 | 1370 | 1380 |      |
|            | 1391  | 1470 | 1475 | 1494 | 1513 | 2964 | 2982 |      |
|            | 3047  | 3053 | 3068 | 3081 | 3098 | 3109 | 3131 | 3778 |
| <b>TS5</b> | -908  | 84   | 115  | 135  | 169  | 205  | 230  |      |
|            | 295   | 361  | 374  | 423  | 435  | 508  | 556  |      |
|            | 591   | 692  | 761  | 798  | 819  | 850  | 899  |      |
|            | 919   | 940  | 971  | 984  | 1023 | 1040 | 1083 |      |
|            | 1118  | 1183 | 1184 | 1248 | 1262 | 1303 | 1320 |      |
|            | 1335  | 1362 | 1368 | 1376 | 1393 | 1408 | 1417 |      |
|            | 1456  | 1486 | 1501 | 1551 | 1567 | 2995 | 3027 |      |
|            | 3040  | 3045 | 3071 | 3085 | 3089 | 3099 | 3181 | 3704 |
| <b>TS6</b> | -1009 | 46   | 95   | 131  | 166  | 186  | 235  |      |
|            | 267   | 288  | 364  | 383  | 455  | 486  | 550  |      |
|            | 587   | 680  | 725  | 795  | 820  | 849  | 889  |      |
|            | 935   | 938  | 969  | 981  | 1031 | 1054 | 1083 |      |
|            | 1121  | 1161 | 1196 | 1242 | 1279 | 1296 | 1320 |      |
|            | 1334  | 1359 | 1365 | 1376 | 1387 | 1391 | 1412 |      |
|            | 1457  | 1484 | 1504 | 1548 | 1575 | 2975 | 3023 |      |
|            | 3037  | 3045 | 3062 | 3082 | 3087 | 3114 | 3177 | 3770 |

**Table S12:** Isodesmic reactions and information for reference species. Naming of species present in Fig. S16.

| <b>RC</b>                                                                            |             |             |             |             |             |                     |
|--------------------------------------------------------------------------------------|-------------|-------------|-------------|-------------|-------------|---------------------|
|    |             |             |             |             |             |                     |
| <i>Exp. Δ<sub>f</sub>H° [kJ/mol]<sup>a</sup></i>                                     |             | -74.87      | -214.9      | 9.92        |             |                     |
| <i>Energy [Hartree]</i>                                                              | -535.112013 | -40.406188  | -385.545038 | -189.954761 |             |                     |
|    |             |             |             |             |             |                     |
| <i>Exp. Δ<sub>f</sub>H° [kJ/mol]<sup>a</sup></i>                                     |             | -124.6      | -124.6      | -214.9      | -214.9      | 75.839 <sup>b</sup> |
| <i>Energy [Hartree]</i>                                                              | -535.112013 | -235.344878 | -235.344878 | -385.545038 | -385.545038 | -234.68889          |
| <b>P1</b>                                                                            |             |             |             |             |             |                     |
|    |             |             |             |             |             |                     |
| <i>Exp. Δ<sub>f</sub>H° [kJ/mol]<sup>a</sup></i>                                     |             | -124.6      | -124.6      | -214.9      | -214.9      | 75.839 <sup>b</sup> |
| <i>Energy [Hartree]</i>                                                              | -535.087637 | -235.344878 | -235.344878 | -385.545038 | -385.545038 | -234.68889          |
|    |             |             |             |             |             |                     |
| <i>Exp. Δ<sub>f</sub>H° [kJ/mol]<sup>a</sup></i>                                     |             | -124.6      | -104.7      | -214.9      | -214.9      | 90                  |
| <i>Energy [Hartree]</i>                                                              | -535.087637 | -235.344878 | -118.850369 | -385.545038 | -385.545038 | -118.195239         |
| <b>P2</b>                                                                            |             |             |             |             |             |                     |
|    |             |             |             |             |             |                     |
| <i>Exp. Δ<sub>f</sub>H° [kJ/mol]<sup>a</sup></i>                                     |             | -124.6      | -124.6      | -214.9      | -214.9      | 75.839 <sup>b</sup> |
| <i>Energy [Hartree]</i>                                                              | -535.088858 | -235.344878 | -235.344878 | -385.545038 | -385.545038 | -234.68889          |
|  |             |             |             |             |             |                     |
| <i>Exp. Δ<sub>f</sub>H° [kJ/mol]<sup>a</sup></i>                                     |             | -124.6      | -104.7      | -214.9      | -214.9      | 90                  |
| <i>Energy [Hartree]</i>                                                              | -535.088858 | -235.344878 | -118.850369 | -385.545038 | -385.545038 | -118.195239         |
| <b>P3</b>                                                                            |             |             |             |             |             |                     |
|  |             |             |             |             |             |                     |
| <i>Exp. Δ<sub>f</sub>H° [kJ/mol]<sup>a</sup></i>                                     |             | -124.6      | -124.6      | -214.9      | -214.9      | 75.839 <sup>b</sup> |
| <i>Energy [Hartree]</i>                                                              | -535.088586 | -235.344878 | -235.344878 | -385.545038 | -385.545038 | -234.68889          |
|  |             |             |             |             |             |                     |
| <i>Exp. Δ<sub>f</sub>H° [kJ/mol]<sup>a</sup></i>                                     |             | -124.6      | -104.7      | -214.9      | -214.9      | 90                  |
| <i>Energy [Hartree]</i>                                                              | -535.088586 | -235.344878 | -118.850369 | -385.545038 | -385.545038 | -118.195239         |
| <b>P4</b>                                                                            |             |             |             |             |             |                     |
|  |             |             |             |             |             |                     |
| <i>Exp. Δ<sub>f</sub>H° [kJ/mol]<sup>a</sup></i>                                     |             | -124.6      | -124.6      | -214.9      | -214.9      | 75.839 <sup>b</sup> |
| <i>Energy [Hartree]</i>                                                              | -535.084927 | -235.344878 | -235.344878 | -385.545038 | -385.545038 | -234.68889          |
|  |             |             |             |             |             |                     |
| <i>Exp. Δ<sub>f</sub>H° [kJ/mol]<sup>a</sup></i>                                     |             | 124.6       | -104.7      | -214.9      | -214.9      | 90                  |
| <i>Energy [Hartree]</i>                                                              | -535.084927 | -235.344878 | -118.850369 | -385.545038 | -385.545038 | -118.195239         |
| <b>P5</b>                                                                            |             |             |             |             |             |                     |

|                                                  |             |             |             |             |
|--------------------------------------------------|-------------|-------------|-------------|-------------|
|                                                  |             |             |             |             |
| <i>Exp. Δ<sub>f</sub>H° [kJ/mol]<sup>a</sup></i> |             | -124.6      | -214.9      | -4.32       |
| <i>Energy [Hartree]</i>                          | -384.337369 | -235.344878 | -385.545038 | -234.138191 |
|                                                  |             |             |             |             |
| <i>Exp. Δ<sub>f</sub>H° [kJ/mol]<sup>a</sup></i> |             | -104.7      | -214.9      | 20.41       |
| <i>Energy [Hartree]</i>                          | -384.337369 | -118.850369 | -385.545038 | -117.641175 |

**P6**

|                                                  |             |             |             |             |
|--------------------------------------------------|-------------|-------------|-------------|-------------|
|                                                  |             |             |             |             |
| <i>Exp. Δ<sub>f</sub>H° [kJ/mol]<sup>a</sup></i> |             | -124.6      | -214.9      | -4.32       |
| <i>Energy [Hartree]</i>                          | -384.337776 | -235.344878 | -385.545038 | -234.138191 |
|                                                  |             |             |             |             |
| <i>Exp. Δ<sub>f</sub>H° [kJ/mol]<sup>a</sup></i> |             | -104.7      | -214.9      | 20.41       |
| <i>Energy [Hartree]</i>                          | -384.337776 | -118.850369 | -385.545038 | -117.641175 |

<sup>a</sup> all Exp. Δ<sub>f</sub>H° from NIST Chemistry WebBook (except <sup>b</sup> from Ref. (19))

## References

1. Hansen N, Cool TA, Westmoreland PR, & Kohse-Höinghaus K (2009) Recent contributions of flame-sampling molecular-beam mass spectrometry to a fundamental understanding of combustion chemistry. *Prog. Energy Combust. Sci.* 35(2):168-191.
2. Qi F (2013) Combustion chemistry probed by synchrotron VUV photoionization mass spectrometry. *Proc. Combust. Inst.* 34:33-63.
3. Wang Z, *et al.* (2018) n-Heptane cool flame chemistry: Unraveling intermediate species measured in a stirred reactor and motored engine. *Combust. Flame* 187(Supplement C):199-216.
4. Dagaut P, *et al.* (1986) A jet-stirred reactor for kinetic studies of homogeneous gas-phase reactions at pressures up to ten atmospheres (1 MPa). *J. Phys. E: Sci. Instrum.* 19:207-209.
5. Raffaelli A & Saba A (2003) Atmospheric pressure photoionization mass spectrometry. *Mass Spectrom. Rev.* 22(5):318-331.
6. Battin-Leclerc F, *et al.* (2010) Experimental confirmation of the low-temperature oxidation scheme of alkanes. *Angew. Chem. Int. Edit.* 49(18):3169-3172.
7. Dodson LG, *et al.* (2015) VUV photoionization cross sections of HO<sub>2</sub>, H<sub>2</sub>O<sub>2</sub>, and H<sub>2</sub>CO. *J. Phys. Chem. A* 119(8):1279-1291.
8. Wang Z, *et al.* (2016) Additional chain-branching pathways in the low-temperature oxidation of branched alkanes. *Combust. Flame* 164:386-396.
9. Wang Z, *et al.* (2017) New insights into the low-temperature oxidation of 2-methylhexane. *Proc. Combust. Inst.* 36:373-382.
10. Frisch MJ, *et al.* (2009) Gaussian 09, Revision D.01, Wallingford CT.
11. Benson SW (1976) *Thermochemical Kinetics* (Wiley-Interscience, New York).
12. Sheng C (2002) Elementary, Pressure Dependent Model for Combustion of C1, C2 and Nitrogen Containing Hydrocarbons: Operation of A Pilot Scale Incinerator and Model Comparison. (New Jersey Institute of Technology, New Jersey, U. S.).
13. Lay TH, Krasnoperov LN, Venanzi CA, Bozzelli JW, & Shokhirev NV (1996) Ab Initio Study of  $\alpha$ -Chlorinated Ethyl Hydroperoxides CH<sub>3</sub>CH<sub>2</sub>OOH, CH<sub>3</sub>CHClOOH, and CH<sub>3</sub>CCl<sub>2</sub>OOH: Conformational Analysis, Internal Rotation Barriers, Vibrational Frequencies, and Thermodynamic Properties. *J. Phys. Chem.* 100(20):8240-8249.
14. Fernandes RX, Zador J, Jusinski LE, Miller JA, & Taatjes CA (2009) Formally direct pathways and low-temperature chain branching in hydrocarbon autoignition: the cyclohexyl + O<sub>2</sub> reaction at high pressure. *Phys. Chem. Chem. Phys.* 11(9):1320-1327.
15. Montgomery Jr. JA, Frisch MJ, Ochterski JW, & Petersson GA (2000) A complete basis set model chemistry. VII. Use of the minimum population localization method. *J. Chem. Phys.* 112(15):6532-6542.
16. Yang Y, Boehman AL, & Simmie JM (2010) Uniqueness in the low temperature oxidation of cycloalkanes. *Combust. Flame* 157(12):2357-2368.
17. Zhang K, *et al.* (2016) An updated experimental and kinetic modeling study of n-heptane oxidation. *Combust. Flame* 172:116-135.
18. CHEMKIN-PRO 15112, Reaction Design: San Diego, (2012).
19. Goos E, Burcat A, & Ruscic B, Extended Third Millennium Ideal Gas and Condensed Phase Thermochemical Database for Combustion with updates from Active Thermochemical Tables.
